1

2 Title

3 **Comprehensive characterization of migration profiles of murine cerebral cortical neurons during**  
4 **development using FlashTag labeling**

5

6 Authors

7 Satoshi Yoshinaga<sup>1</sup>, Minkyung Shin<sup>1</sup>, Ayako Kitazawa<sup>1</sup>, Kazuhiro Ishii<sup>1</sup>, Masato  
8 Tanuma<sup>2</sup>, Atsushi Kasai<sup>2</sup>, Hitoshi Hashimoto<sup>2, 3, 4, 5, 6</sup>, Ken-ichiro Kubo<sup>1, \*</sup> and  
9 Kazunori Nakajima<sup>1, 7, \*</sup>

10 Affiliations

11 1. Department of Anatomy, Keio University School of Medicine, Shinjuku, Tokyo, 160-8582, Japan.

12 2. Laboratory of Molecular Neuropharmacology, Graduate School of Pharmaceutical Sciences, Osaka  
13 University, Suita, Osaka 565-0871, Japan.

14 3. Molecular Research Center for Children's Mental Development, United Graduate School of Child  
15 Development, Osaka University, Kanazawa University, Hamamatsu University School of Medicine,  
16 Chiba University, and University of Fukui, Suita, Osaka 565-0871, Japan.

17 4. Division of Bioscience, Institute for Dataability Science, Osaka University, Suita, Osaka 565-0871,  
18 Japan.

19 5. Open and Transdisciplinary Research Initiatives, Osaka University, Suita, Osaka 565-0871, Japan.

20 6. Department of Molecular Pharmaceutical Sciences, Graduate School of Medicine, Osaka University,  
21 Suita, Osaka 565-0871, Japan.

22 7. Lead Contact

23 Author List Footnotes

24 Present address

25 Minkyun Shin: Korea Brain Research Institute, Dong-gu, Daegu, 41068, Republic of Korea; Kazuhiro

26 Ishii: Department of Psychiatry, The Jikei University School of Medicine, Minato, Tokyo, 105-8461,

27 Japan.

28 \*Correspondence:

29 [kkubo@keio.jp](mailto:kkubo@keio.jp), [kazunori@keio.jp](mailto:kazunori@keio.jp)

30

31 **Summary**

32 In mammalian cerebral neocortex, different regions have different cytoarchitecture, neuronal birthdates  
33 and functions. In most regions, neuronal migratory profiles have been speculated similar to each other  
34 based on observations using thymidine analogues. Few reports investigated regional migratory  
35 differences from mitosis at the ventricular surface. Here, in mice, we applied FlashTag technology, in  
36 which dyes are injected intraventricularly, to describe migratory profiles. We revealed a mediolateral  
37 regional difference in migratory profiles of neurons that is dependent on the developmental stages, e.g.,  
38 neurons labeled at E12.5-15.5 reached their destination earlier dorsomedially than dorsolaterally even  
39 where there were underlying ventricular surfaces, reflecting sojourning below the subplate. This  
40 difference was hardly recapitulated by thymidine analogues, which visualize neurogenic gradient,  
41 suggesting biological significance different from neurogenic gradient. These observations advance  
42 understanding of cortical development, portraying strength of FlashTag in studying migration, and are  
43 thus a resource for studies of normal and abnormal neurodevelopment.

44 **Key words**

45 Cortical development, carboxyfluorescein succinimidyl ester, FlashTag, cell migration, neuronal  
46 migration, neuronal birthdate, cortical regions, subplate, projection neurons, thymidine analogues.

47

48 **Introduction**

49           The mammalian cerebral neocortex is a well-organized, 6-layered structure that contains diversity  
50 of neurons. Neuronal migration is an essential step for precise formation of complex cortical  
51 cytoarchitecture which underlies the evolution of mammalian cognitive function. In the earliest stage of  
52 cortical development, neural stem cells form a pseudostratified structure called neuroepithelium, and  
53 these stem cells undergo self-renewal to expand the cortical areas (Caviness et al., 1995; His, 1889; Rakic,  
54 1995; Sauer, 1935; Subramanian et al., 2017). They then begin to produce the earliest-born neurons  
55 (Bystron et al., 2006; Iacopetti et al., 1999), which form the preplate (PP), or primordial plexiform layer  
56 (Marin-Padilla, 1971) (See Figures S1A, B and the *histological terminology* section in Star Methods).  
57 These neurons include Cajal-Retzius cells and future subplate (SP) neurons, most of which are transient  
58 population that undergo cell death postnatally (Hoerder-Suabedissen and Molnár, 2015; Kostovic and  
59 Rakic, 1990; Price et al., 1997). In the pallium, cortical projection neuron production follows. They  
60 derive from radial glial cells in the ventricular zone (VZ). Some daughter cells become postmitotic soon  
61 after they exit the VZ (Tabata et al., 2009) and others divide in a more basal structure (the subventricular  
62 zone or SVZ)(Boulder-Committee, 1970; Takahashi et al., 1996). In both cases, they migrate radially  
63 through the intermediate zone (IZ), SP, and the cortical plate (CP) to the primitive cortical zone (PCZ)  
64 (Sekine et al., 2011; Sekine et al., 2012), the most superficial part of the CP. Migrating neurons overtake  
65 earlier born neurons to finish their migration in the PCZ and this process serves as a basis of the  
66 inside-out pattern of neuronal positioning, in which earlier-born neurons position deeply and later-born  
67 neurons position superficially (Sekine et al., 2011; Shin et al., 2019).

68           Different cortical regions have different functions. The cerebral cortex is subdivided into many  
69 cortical areas based on cytoarchitectonics (Brodmann, 1909), which have high correlations with function.  
70 According to the protomap hypothesis, the neural stem cells in the VZ provide a protomap of prospective  
71 cytoarchitectonic areas (Rakic, 1988). Since, in addition to thalamic input (Moreno-Juan et al., 2017),  
72 neuronal migration takes place between proliferation at the ventricular surface and formation of  
73 cytoarchitectonics, neuronal migratory profiles of the whole brain visualized from mitosis at the  
74 ventricular surface to their final destination may serve as basic information to understand the formation of  
75 the complex mammalian brain.

76           To describe the above-mentioned neuronal behaviors in the neurogenesis, positioning and neuronal  
77 migration, thymidine analogues have long been used. Interkinetic nuclear migration of the VZ stem cells  
78 (Fujita, 1963) and inside-out pattern of neuronal birthdate (Angevine and Sidman, 1961; Bayer and

79 Altman, 1991; Hicks and D'Amato, 1968) was clearly shown by tritium thymidine ( $^3\text{H-TdR}$ ). The  
80 limitation of the use of these S-phase markers to study neuronal migration was hardly discussed,  
81 however; in the last 20 years, growing evidence suggests that many projection neurons, especially  
82 superficial layer neurons, are generated indirectly in the SVZ from intermediate neural progenitors  
83 (Haubensak et al., 2004; Kowalczyk et al., 2009; Miyata et al., 2004; Noctor et al., 2004; Takahashi et al.,  
84 1996) and basal radial glial cells (Fietz et al., 2010; Hansen et al., 2010) that derive from (apical) radial  
85 glial cells, in addition to direct neurogenesis (Tabata et al., 2009). Also, interneurons are born in the  
86 ventral forebrain and migrate all the way to the cortex (tangential migration) (Anderson et al., 1997;  
87 Marin and Rubenstein, 2001; Tamamaki et al., 1997). Thymidine analogues are incorporated in the  
88 S-phase and retained by the progeny of dividing cells that undergo final mitosis irrespective of the  
89 anatomical position. Because basal progenitors are already in the midst of migration when they are in the  
90 S-phase, and because interneurons incorporate thymidine analogues ventrally, migratory “profiles” of  
91 neurons revealed by thymidine analogues contain those with different “starting points” (cellular positions  
92 when thymidine analogues are incorporated).

93 As a method to align the “starting points”, we previously developed *in utero* electroporation, in  
94 which expression plasmids are injected into the lateral ventricle and electrical pulses are given to transfect  
95 the cells along the ventricular surface at the time of labeling (Tabata and Nakajima, 2001; Tabata and  
96 Nakajima, 2008). This method is supposed to label apical progenitors in the S/G2/M phase preferentially  
97 (Pilaz et al., 2009). With this method, we previously described a) different migratory profiles between the  
98 direct progeny of apical progenitors and basal progenitors and b) regional differences in the abundance of  
99 the two modes of neurogenesis between dorsomedial and dorsolateral cortex (Tabata et al., 2009). Since it  
100 is well described that neurogenic event progresses along the lateral-to-medial gradient (Hicks and  
101 D'Amato, 1968; Smart and McSherry, 1982; Smart and Smart, 1982; Takahashi et al., 1999), we  
102 hypothesized that the migratory profile of dorsomedial (future cingulate) cortex and dorsolateral cortex  
103 (future somatosensory cortex where there is an underlying ventricular zone prenatally) differs  
104 significantly. On the other hand, aforementioned work (Bayer and Altman, 1991) and others (Hicks and  
105 D'Amato, 1968) using thymidine analogues did not describe as such, although the former studied regional  
106 differences in the migration of later-born cortical neurons in rats and they observed that it took about two  
107 days for labeled neurons to reach the top of the CP in the dorsomedial and dorsolateral cortex where there  
108 is an underlining VZ, while neurons migrating to the lateral (future presumptive insular and piriform)  
109 cortex which lack underlining VZ took longer because they migrate in a sigmoid manner to circumvent

110 the growing striatum along the lateral cortical stream. The overall migratory profiles of neurons that are  
111 born at ventricular surfaces in different cortical regions at different stages remain to be described.

112 To visualize migration of neurons of different cortical regions that undergo mitosis at ventricular  
113 surface at given timing, we decided to take advantage of FlashTag (FT) technology (Govindan et al.,  
114 2018; Telley et al., 2016), in which fluorescent dyes were injected into the ventricle. This technique is  
115 reported to label ventricular cells at the M-phase specifically. Once the hydrophobic precursor fluorescent  
116 molecules (5(6)-carboxyfluorescein diacetate succinimidyl ester; CFDA-SE, often called CFSE in  
117 biological contexts) diffuse into the cell, cellular esterases cleave it to produce carboxyfluorescein  
118 succinimidyl ester, which is fluorescent and covalently bound to intracellular proteins (Telley et al., 2016).  
119 FT also refers to the use of other compounds with identical modes of action, including CytoTell Blue  
120 (Telley et al., 2016). Here, we successfully visualized the migration of projection neuron in different  
121 cortical regions with high temporal resolution. We describe mediolateral regional differences in migratory  
122 profiles of neurons born at different stages in regions where there is an underlying ventricular zone,  
123 which was not clearly detected by experiments using thymidine analogues.

124

## 125 **Results**

### 126 **Characterization of cell population labeled with FT**

127 FT technology has been increasingly used to label neuronal progenitors on the ventricular surfaces  
128 and their positioning (Govindan et al., 2018; Mayer et al., 2018; Oberst et al., 2019; Telley et al., 2019;  
129 Telley et al., 2016), but it has hardly used to study overall migratory profiles. Therefore, we first  
130 characterized the cellular population labeled with FT to ensure the validity of our analyses. We performed  
131 intraventricular injection of ~0.5  $\mu$ l of 1 mM of CFSE. We decreased the concentration of CFSE and  
132 quantity of organic solvent to one tenth of that used in the previous studies (Govindan et al., 2018; Telley  
133 et al., 2016) to minimize any possible but unknown side effects from injection although the original  
134 concentration was successfully used. To characterize the population of cells labeled with FT, we injected  
135 CFSE into the lateral ventricle (LV) of E14 ICR embryos and fixed 0.5-9.5 hours later (Figures 1A-E).  
136 When brains were fixed 0.5 hour after the dye injection, strong fluorescence was observed in cells most  
137 apical in the pallial VZ, which often overlapped with phospho-histone H3 (pH3, a mitosis marker)  
138 (Hendzel et al., 1997; Kim et al., 2017)-positive cells along the ventricular surface (Figure 1A). More  
139 than one third of the labeled cells were positive for pH3 (Figure 1F, -0.5 hour), although the mitosis rate  
140 should be underestimated by the time lag between dye injection and fixation. FT-labeled cells moved  
141 basally to leave the ventricular surface (Figures 1A-D). 3.5 hours after FT labeling, FT-labeled cells

142 already left the ventricular surface and were almost never immunolabeled with pH3 (Figures 1B, F, -3.5  
143 hours), suggesting that the labeling time window is less than several hours, compatible with previous  
144 observations (Telley et al., 2016). To visualize the difference of cellular population labeled with FT and  
145 thymidine analogues, we performed bolus injection of 5-ethynyl-2'-deoxyuridine (EdU, a thymidine  
146 analogue) into the intraperitoneal cavity of the mother mice at the same time with or 3-9 hours after FT  
147 labeling (Figures 1A-E). No cells were double-positive for FT labeling and EdU when EdU and FT  
148 labeling were performed simultaneously (Figures 1A, F, -0.5 hour). 9 hours after FT, some FT-labeled  
149 (FT+) cells were also labeled with EdU (EdU+), indicating that they reentered S-phase (Figures 1D, G,  
150 -9.5 hours). The slight differences of EdU+/FT+ between dorsomedial and dorsolateral cortices (Figure  
151 1G, -9.5 hours, the definition of dorsomedial, dorsal and dorsolateral cortices, as well as cortical zones in  
152 this study are given in Figures S1A, B) might reflect differences in cell cycle length and/or proportion of  
153 direct neurogenesis (Polleux et al., 1997).

154 To further define the difference of labeled cellular population, we performed bolus injection of  
155 EdU into the intraperitoneal cavity of the mother mice at the same time with or 3-9 hours prior to FT  
156 (Figures 1H-L). Brains were harvested 0.5 hours after FT. Approximately 60 to 90% of FT-labeled cells  
157 in mice treated with EdU 3-9 hours prior to FT were co-labeled with EdU (Figure 1L, -3.5, -6.5, 9.5 hour).  
158 Since EdU is incorporated in the S-phase, these observations suggest that S-phase cells move apically to  
159 the ventricular surface by interkinetic nuclear migration over the course of several hours and are labeled  
160 with FT when they are around M-phase. Collectively, these observations suggest that FT labels cells  
161 around M phase on the ventricular surface almost specifically, and that FT can serve as a method to  
162 describe neuronal migration from the identical starting point, i.e., ventricular surface.

163 To investigate whether cortical interneurons were also labeled with FT, CytoTell Blue, another  
164 fluorescent dye used for FT labeling (Govindan et al., 2018; Telley et al., 2016), was injected into the LV  
165 of the E12.5 (Figures 1M, N) and E15.5 (Figure 1O) GAD67-GFP knock-in mouse brains (Tamamaki et  
166 al., 2003), in which interneurons are labeled with GFP. Examined several days after labeling, most of the  
167 FT-labeled cells were in the CP/gray matter and vast majority of them were negative for GFP. Many  
168 migrating cells in the lateral cortical stream (LCS) or "reservoir" (Bayer and Altman, 1991) were also  
169 mostly negative for GFP (Figures S1C, C1-C3). More ventrally, FT-labeled cells were identified in the  
170 caudal amygdaloid stream (CAS) (Remedios et al., 2007) and were negative for GFP (Figures S1C,  
171 C4-C6). GFP-labeled interneurons that migrated into the dorsal pallium were rarely labeled with FT,  
172 except for a small number of cells that were positive for both FT and GFP (Figures 1N, O, arrowheads),  
173 suggesting that most of the FT-labeled cells in the cortex are projection neurons when FT labeling is  
174 performed at E12.5-15.5.

175 Why did we observe only few FT-labeled interneurons in the cortex, although the ventral progenitors  
176 of the interneurons are also labeled with FT (Mayer et al., 2018) (Figures S1D, E)? We reasoned that  
177 frequent abventricular cell division might dilute the fluorescent dyes, losing fluorescent labeling. In fact,  
178 we performed immunohistochemistry against pH3 and confirmed that abventricular mitosis is very  
179 frequent in the ganglionic eminences (Figures S1D, E), compatible with previous reports (Katayama et al.,  
180 2013; Smart, 1976; Tan et al., 2016; Tan and Shi, 2013). We next reasoned that injection of a fluorescent  
181 dye into the SVZ might prevent loss of fluorescence by dilution upon abventricular mitosis. To address  
182 this, we injected CytoTell Blue into the parenchyma of the ganglionic eminences (the injection sites were  
183 retrospectively identified, e.g., the presumable injection site is shown by an asterisk in Figure S1F) in the  
184 *GAD67-GFP* mice at E12.5, and labeled interneuron progenitors far more strongly than intraventricular  
185 injections. FT and GFP-double labeled cells with tangential morphologies were distributed in the whole  
186 hemispheres, especially in the SVZ and marginal zone (MZ) of the dorsal pallium at E15.5 (Figures S1F,  
187 F1-10). These observations are compatible with the idea that FT-labeled interneuron progenitors in the  
188 VZ undergo mitosis in the SVZ, resulting in the loss of FT fluorescence in the migrating cortical  
189 interneurons when fluorescent dyes were injected intraventricularly. Another group independently reported  
190 that the projection neurons occupied the majority of the FT-labeled cells using single-cell RNA-seq  
191 (Telley et al., 2019).

192 In summary, when fluorescent dyes were injected intraventricularly, the FT-labeled cells at early  
193 (E12.5) and late (E15.5) stages of neurogenesis were mostly non-GABAergic projection neurons. We do  
194 not preclude small subpopulation of interneurons from being labeled with FT, which will be described  
195 later in late and very late stages of neurogenesis (E15.5 and E17.0 cohort).

196

### 197 **FT visualizes clear regional differences in neuronal migration profiles in the cerebral cortex**

198 During characterizing FT labeling, we noticed that there are regional differences in neuronal  
199 migration during development of the cerebral cortex using FT technology. We performed FT labeling at  
200 E14.5 and fixed two days later (Figure 2A). Many FT-labeled cells reached the top of the CP in the  
201 dorsomedial cortex while most of the labeled cells were still below the SP in the dorsolateral cortex (the  
202 lower border of the SP is shown by yellow dotted lines). This suggests that there are clear regional  
203 differences in neuronal migration profiles, e.g., times required for cells to reach the top of the CP, even  
204 where there is an underlying ventricular surface, when mitotic cells on the ventricular surface are  
205 selectively labeled with FT.

206 To compare migration profiles visualized with FT labeling with those with thymidine analogues, EdU  
207 was also administered at the same time with FT labeling. The distribution of EdU-positive cells was



208 similar to that reported previously (Bayer and Altman, 1991) as expected, and the distribution of labeled  
209 cells did not clearly differ between the dorsomedial and dorsolateral region when examined where there is  
210 an underlying ventricular zone (Figures 2B, C). The EdU-labeled neurons in the dorsolateral CP (Figure  
211 2B) should have passed the SP to enter the CP earlier than FT-labeled cells (Figure 2A), although  
212 M-phase labeled (FT-labeled) cells should have started migration earlier than S-phase labeled  
213 (EdU-labeled) cells if they were labeled in the VZ. Therefore, EdU-labeled neurons in the dorsolateral CP  
214 in Figure 2B would have been in the S-phase in the SVZ at the time of FT labeling and EdU  
215 administration. We previously reported that mitotically-active population leaving the VZ (rapidly exiting  
216 population, or REP) (Tabata et al., 2009), most of which corresponds to the basal progenitors and glial  
217 progenitors (Tabata et al., 2009; Tabata et al., 2012), are abundant in the dorsolateral cortex than  
218 dorsomedial cortex. This population would have contributed to the EdU-labeled cells in the dorsolateral  
219 CP.

220 To further characterize these regional differences, we performed time-lapse imaging of the FT-labeled  
221 cells (Figure 2D). In the dorsolateral cortex, labeled cells left the VZ to enter and accumulate in the  
222 multipolar cell accumulation zone (MAZ), a zone enriched in postmitotic multipolar cells (Tabata et al.,  
223 2009; Tabata et al., 2012)(Figure 2D, 10:08-25:21). They then migrated through the IZ and transiently  
224 sojourned just below the SP (Figure 2D, 30:25-35:29) before entering the CP (Figure 2D, 40:34). This  
225 sojourning behavior below the SP would correspond to the stationary period (Ohtaka-Maruyama et al.,  
226 2018). To note, this sojourning behavior was not clear in the dorsomedial cortex. To visualize the  
227 migratory profile in 3 dimensions (3D), we injected the dye at E14.5 and fixed about two days later, and  
228 the brains were subjected to 3D FAST imaging (Seiriki et al., 2017; Seiriki et al., 2019). The mediolateral  
229 difference in the migratory profile was preserved along the anterior-posterior axis (Figure 2E,  
230 Supplemental movie. 1). The difference was somewhat clearer in posterior cortex (presumptive  
231 retrosplenial - visual cortex) than anterior (presumptive medial prefrontal cortex – somatosensory cortex).  
232 These observations suggest that this mediolateral difference in neuronal migration profiles may, at least in  
233 part, result from transient pause just below the dorsolateral SP.

234

### 235 **Regional migratory/positional profiles differ from neuronal birthdates at the ventricular surface**

236 It was previously reported that early and late-born neurons migrate differently (Hatanaka et al., 2004).  
237 Do both early-born neurons and late-born neurons show similar regional differences? Or do regional  
238 differences have birthdate-dependent characters? To better understand migration profiles of neurons born  
239 at different embryonic stages, we injected CFSE at E10.5, 11.5, 12.5 13.5, 14.5, 15.5, 17.0 and fixed

240 chronologically. Subsequent observation was carried out on the coronal section in which the  
241 interventricular foramen was visible, respectively.

#### 242 **E10.5 cohort**

243 One day after injection, at E11.5, some labeled cells were already located in the PP in both  
244 dorsomedial and dorsolateral cortex (Figures 3D, E, Figure S2A), although the formed PP is very thin  
245 especially in the dorsomedial cortex (Figure 3D). Many other labeled cells were still in the VZ, which  
246 consists of densely-packed, radially oriented (Boulder-Committee, 1970) Pax6-positive (Englund et al.,  
247 2005) nuclei of radial glia. Two days after injection, at E12.5, most of the labeled cells were in the PP  
248 (Figure 3A, D, E, Figure S2B). Mediolateral migratory differences were not clear in these observations.

249 Three days after injection, at E13.5, the CSPG (Bicknese et al., 1994) and nuclear staining showed PP  
250 splitting proceeded in a lateral-to-medial direction and an emergence of the cortical plate was apparently  
251 recognized in the dorsolateral cortex (asterisks in Figure 3B, a blue arrow in Figure 3E) but not in the  
252 dorsomedial cortex (Figures 3B, D)(upper and lower borders of the formed CP are shown by blue lines in  
253 Figures 3D and 3E), which is consistent with the lateral-to-medial neurogenic gradient. In the dorsolateral  
254 cortex, most of the labeled cells were in the CP and MZ, whereas in the dorsomedial cortex, most of the  
255 labeled cells were in the PP. Note that strongly-labeled cells were hardly found in the SP just below the  
256 CP at E13.5 (Figures 3B, D, E, Figure S2C). At E14.5-15.5 in the dorsomedial cortex, labeled cells were  
257 found at the boundary between SP and CP as well as in the MZ (Figures 3D, Figures S2D, S2E), which  
258 was similar to the dorsolateral cortex of the E14.5 (Figures 3E, Figure S2D). In the E15.5 dorsolateral  
259 cortex, many labeled cells were distributed in the CSPG-positive SP below the CP (Fig. 3E, Figure S2E).  
260 At E16.5, in both the dorsomedial and dorsolateral cortex, labeled cells were mainly found in the SP  
261 (Figures 3C, D, E, Figure S2F) and were Tbr1 (Hevner et al., 2001)-positive (Figure S2G), suggesting  
262 that they are of pallial origin. Some cells were also found in the MZ (Figures 3C, D, E, Figure S2G) and  
263 were also positive for Reelin (Ogawa et al., 1995) (Figures S2G), suggesting that FT labeling at E10.5  
264 mainly labels Tbr1-positive SP cells and Cajal-Retzius cells. These observations suggest that at least  
265 some future SP neurons in the PP are located in the CP and MZ when the CP begins to be formed. They  
266 might eventually move down to the SP layer in a lateral-to-medial fashion. This view is compatible with  
267 previous observations (Bayer and Altman, 1991; Osheroff and Hatten, 2009; Saito et al., 2019). Recent  
268 observations have shown that future SP neurons migrate tangentially in the PP (Pedraza et al., 2014; Saito  
269 et al., 2019), but FT failed to explicitly detect tangential migration of the future SP neurons probably  
270 because FT labels the whole hemispheres.

271 In summary, E10.5 cohort reached the PP in less than one day after they exited the VZ in both  
272 dorsomedial and dorsolateral cortices. Among the E10.5 cohort, future SP neurons formed a distinct layer  
273 below the CP in a lateral-to-medial fashion, reflecting the well-described neurogenic gradient.

#### 274 **E11.5 cohort**

275 As early as half a day after injection, at E12.0, most of the labeled cells were located in the VZ, and  
276 some cells were in the CSPG-positive PP in both the dorsomedial (Figures 4D, E, an arrowhead in Figure  
277 4D, Figure S3A) and dorsolateral cortex (Figures 4D, E, arrowheads in Figure 4E, Figure S3A). At E12.5  
278 and 13.0, more labeled cells were found in the PP in both dorsomedial (Figures 4A, B, D, Figures S3B,  
279 S3C) and dorsolateral cortex (Figures 4A, B, E, Figures S3B, S3C) as well as in VZ. Many labeled cells  
280 reached just beneath the meninges. At E 13.5, in the dorsomedial cortex, where PP splitting has not  
281 occurred yet at this stage, many neurons were located in the PP just beneath the meninges (Figure 4D,  
282 Figure S3D). However, in the dorsolateral cortex, where the PP was split, many labeled cells showed  
283 radial (parallel to the apicobasal axis) alignment in the newly formed CP (Figure 4E, Figure S3D). The  
284 formation of the CP coincided with this radial alignment of the labeled cells at E13.5 in the dorsolateral  
285 cortex and E14.5 in the dorsomedial cortex (Figures 4D, E, Figure S3E). At E15.5, some cells were  
286 located in the MZ, others stayed in the deep part of the CP and expressed a deep layer marker *Ctip2*  
287 (Arlotta et al., 2005), and still others emerged below the CP (Figures 4C, D, E, Figures S3F, S3G, S3H).

288 In summary, E11.5 cohort reached the PP soon after they exited the VZ in both dorsomedial and  
289 dorsolateral cortices, like E10.5 cohort. The formation of radial alignment occurred after they reached just  
290 below the meningeal surface in a lateral-to-medial fashion, in parallel with the formation of the CP. As in  
291 the E10.5 cohort, future SP neurons formed a distinct layer below the CP after the CP formed in the  
292 E11.5 cohort.

#### 293 **E12.5 cohort**

294 As early as half a day after injection, at E13.0, many labeled cells were in the VZ, but a small number  
295 of labeled cells were also found in the PP in the dorsomedial cortex (Figures 5A, G, Figure S4A, S4G).  
296 The latter cells were often weakly positive for Pax6 (Figure S4G, arrowheads) (number of FT+/Pax6+  
297 cells,  $9.0 \pm 2.0$  cells [mean  $\pm$  standard error of means] /dorsomedial low power field,  $n = 4$  brains). On the  
298 other hand, in the dorsolateral cortex, many labeled cells were located in zones just above the VZ in  
299 addition to the VZ, and they are mostly negative for Pax6 (Figures 5A, H, Figure S4A, S4H; arrows).  
300 FT+ / Pax6+ cells outside of the VZ were relatively rare in the dorsolateral cortex (number of FT+/Pax6+  
301 cells,  $1.6 \pm 0.8$  cells/dorsolateral low power field,  $n = 4$  brains). One day after injection, at E13.5, more  
302 labeled cells were in the PP in addition to the VZ in the dorsomedial cortex and labeled cells in the PP  
303 were no longer positive for Pax6 (Figures 5B, G, Figure S4B). In the dorsolateral cortex, the incipient CP

304 appears at this stage (E13.5) (See also Figure 3B), and majority of the labeled cells were below the CP  
305 and still migrating in the IZ (Figures 5B, H, Figure S4B). Some of them entered and were radially aligned  
306 in the CP; others were migrating in the IZ at E14.0 (Figures 5C, H, Figure S4C). In the dorsomedial  
307 cortex of E14.0, however, when the incipient CP is about to be formed, many labeled cells had already  
308 reached just beneath the meningeal surface (Figures 5C, G, Figure S4C). The radial alignment of the  
309 labeled cells coincided with the formation of the CP at E14.5 in the dorsomedial cortex (2 days after  
310 injection) (Figures 5D, G, Figure S4D), as in the E11.5 cohort. Most of the labeled cells occupy the CP at  
311 E15.5 at both dorsomedial and dorsolateral cortex (Figures 5E, G, H, Figure S4E), and some emerged in  
312 the SP at E16.5 in the dorsomedial cortex (Figures 5F, G, Figure S4F).

313 Taken together, we observed slight signs of mediolateral differences in migration profiles of neurons  
314 labeled at E12.5, that is, dorsomedial E12.5 cohort reached the outermost region of the PP just beneath  
315 the pial surface relatively soon after they left the VZ, while dorsolateral E12.5 cohort slowly migrate in  
316 the lower part of the PP or IZ before they enter the CP. Radial alignment of the labeled cells, on the other  
317 hand, occurred in a lateral-to-medial fashion in parallel with the formation of the CP.

#### 318 **E13.5 cohort**

319 Half a day after injection, at E14.0, most of the labeled cells were located in or just above the VZ, i.e.  
320 the multipolar cell accumulation zone (MAZ), a zone enriched in postmitotic multipolar cells (Tabata et  
321 al., 2009; Tabata et al., 2012), in both dorsomedial and dorsolateral cortex (Figures 6A, F, G, Figure S5A).  
322 One day after injection, at E14.5, many labeled neurons were migrating in the IZ below the  
323 CSPG-positive SP (Figures 6B, F, G, Figure S5B). One and a half days after injection, at E15.0, many  
324 labeled cells reached the top of the CP in the dorsomedial cortex (Figures 6C, F, Figure S5C), while in  
325 the dorsolateral cortex, few cells reached the CP and many cells were still migrating in the superficial IZ  
326 or beneath the SP (Figures 6C, G, Figure S5C). In the dorsolateral cortex, it was at E15.5-16.5 when most  
327 of the labeled cells reached the superficial CP (Figures 6D, E, G, Figure S5D, S5E). These observations  
328 suggest that there are clear regional differences in times required for neurons to reach the CP for the  
329 E13.5 cohort. At E16.5, E17.5 and E18.5, labeled neurons were overtaken by neurons presumptively born  
330 later to settle in the deep part of the CP (Figures 6E, F, G, Figures S5F, G) in dorsomedial and  
331 dorsolateral cortices. In the ventrolateral cortex, some labeled neurons were still in the reservoir and  
332 others were migrating out the reservoir to the insular and piriform CP (Figures S5F, F1) at E17.5,  
333 compatible with the previous observation that neurons which migrate along the lateral cortical stream take  
334 longer to reach their final destinations (Bayer and Altman, 1991). Labeled neurons were also observed in  
335 the presumptive CAS (Remedios et al., 2007) (Figures 5F2).

336 In summary, cells labeled at E13.5 reached just beneath the meningeal surface in about 1.5 days in the  
337 dorsomedial cortex, while those in the dorsolateral cortex took longer to enter the CP and thus to reach  
338 just beneath the meningeal surface. This areal difference was similar to that observed in E14.5 cohort in  
339 Figure 2, and likely to be explained by transient sojourning below the SP, at least in part.

#### 340 **E14.5 cohort**

341 To confirm if regional migratory differences observed in the slice time-lapse imaging are indeed  
342 observed *in vivo*, and to characterize regional differences better histologically, we performed FT labeling  
343 at E14.5 and fixed chronologically (Figures 7A-I, Figures S6A-H). Half a day after injection, at E15.0,  
344 most of the labeled cells were in the VZ (Figure 7A, H, I, Figures S6A). Small number of labeled cells  
345 left the VZ mainly in the dorsolateral cortex (Figure 7H, J) (dorsomedial,  $3.7 \pm 0.9$  cells/low power field,  
346  $n = 3$  brains; dorsolateral,  $23.0 \pm 3.5$  cells/low power field,  $n = 3$  brains). They have a long ascending  
347 process and a retraction bulb, and mitotically active as shown by Ki-67 immunoreactivity (Figure 7J),  
348 which presumably corresponds to the mitotically-active rapidly exiting population (REP) that we reported  
349 previously (Tabata et al., 2009). They were also positive for stem cell markers Pax6 and Sox2, although  
350 they were outside of the VZ (Figure 7J) (Pax6 positive, dorsomedial,  $91.7 \pm 8.3\%$ , 11 cells from 3 brains;  
351 dorsolateral,  $80.8 \pm 2.9\%$ , 69 cells from 3 brains), suggesting that most of the cells in this population has  
352 a feature of mouse outer radial glial cells (moRG) (Shitamukai et al., 2011; Vaid et al., 2018; Wang et al.,  
353 2011). The progeny of this population was often difficult to identify, probably because the fluorescent  
354 signals decrease upon mitosis in the SVZ. One day after injection, at E15.5, the major population of the  
355 labeled cells left the VZ and accumulated in the MAZ (Figures 7B, H, I, Figures S6B). One and a half  
356 days after injection, at E16.0, most of the labeled cells were migrating in the IZ (Figures 7C, H, I, Figures  
357 S6C). Until this timepoint, mediolateral migratory difference of the major population was not so clear.  
358 Two days after injection, at E16.5, however, many cells reached the most superficial part of the CP in the  
359 dorsomedial cortex, while the majority were still migrating in the IZ just beneath the SP in the  
360 dorsolateral cortex (Figures 7D, H, I, Figures S6D), showing a clear mediolateral difference in migration.  
361 These observations are consistent with the view that mediolateral migratory difference is attributable to  
362 the migratory behavior of neurons in the dorsolateral IZ or just beneath the dorsolateral SP. In the  
363 dorsomedial cortex, most of the labeled cells settled in the most superficial CP, or PCZ, a zone composed  
364 of densely packed immature neurons (Sekine et al., 2011; Sekine et al., 2012; Shin et al., 2019), at  
365 E16.5-17.5 (Figures 7D, E, H). By E18.5, they were overtaken by presumptive later-born neurons and  
366 positioned in a slightly deeper part of the CP as NeuN-positive mature neurons in the dorsomedial cortex  
367 (Figures 7F, H). In the dorsolateral cortex, it took one more day to reach the CP (Figures 7E, I, Figures  
368 S6E) and settled in the PCZ (double headed arrows in Figures 7G, H, I) at E17.5-18.5 (Figures 7E, F, I,

369 Figures S6E, S6F). At P0.5, they positioned in a slightly deeper part of the CP as NeuN-positive mature  
370 neurons (Figure 7G) by being taken over by immature neurons in the PCZ. At P7, labeled neurons mainly  
371 positioned in layer II/III in the dorsomedial and lateral cortices and in layer IV in the dorsolateral cortex  
372 (Figure S6H).

373 In summary, labeled cells showed similar migratory profile until they enter the IZ in both dorsolateral  
374 and dorsomedial cortices. Cells take longer before they pass the SP and enter the CP in the dorsolateral  
375 cortex, compatible with our *in vitro* observations in Figure 2 and similar to the E13.5 cohort. This time  
376 lag to enter the CP was not caught up until they settle in their final destination. These observations  
377 suggest that regional differences in migration of the E14.5 cohort derive from transient sojourning in the  
378 IZ below the SP, at least in part.

### 379 **E15.5 cohort**

380 Half a day after injection, at E16.0, many of the labeled cells were in the VZ (Figures 8A, B, Figures  
381 S7A, S7H, S7I). We observed some cells outside of the VZ (Figures 8B, Figures S7A, I, arrowheads),  
382 which were often positive for Pax6, as in E14.5 cohort. Around the pallial-subpallial boundaries (PSB),  
383 small number of cells with single long ascending processes with various orientation were scattered  
384 (Figure S7J; similar cells were observed in E17.0 cohort and will be analyzed in detail).

385 One day after injection, at E16.5, most of the labeled cells were accumulated in the MAZ both in  
386 the dorsomedial and dorsolateral cortex (Figures 8A, B, Figures S7B, S7H, S7I). 1.5 days after injection,  
387 at E17.0, some labeled cells entered the IZ, which is rich in L1-positive axons including thalamocortical  
388 and corticofugal axons (Fukuda et al., 1997; Kudo et al., 2005; Yoshinaga et al., 2012), both in the  
389 dorsomedial and dorsolateral cortex (Figures 8A, B, Figures S7C, S7H, S7I). Two days after injection, at  
390 E17.5, most of the labeled cells were migrating in the superficial and deep part of the IZ in the  
391 dorsomedial cortex (Figure 8A, Figures S7D, S7H), but in the dorsolateral cortex, migrating cells were  
392 mainly located in the deep part of the IZ (Figure 8B, Figures S7D, S7I).

393 Three days after injection, at E18.5, most of the labeled cells were located in the PCZ in the  
394 dorsomedial cortex (Figure 8A, Figures S7E, S7H). On the other hand, in the dorsolateral cortex, only a  
395 small population of the labeled cells reached the PCZ and others were still migrating in the CP and the SP  
396 in a locomotion morphology (Figure 8B, Figures S7E, S7I). In the dorsolateral cortex, it took one more  
397 day for most of them to reach the PCZ at P0.5 (Figure 8B, Figure S7F, S7I).

398 At P1.5, cells labeled at E15.5 settled in the gray matter both in the dorsomedial and dorsolateral  
399 cortices (Figures 8A, B, Figures S7G, S7H, S7I). In the dorsolateral cortex, some of these labeled cells  
400 changed their position slightly deeper to leave the top of the CP, which was not prominently observed in  
401 the dorsomedial cortex (Figures 8A, B, Figures S7G, S7H, S7I).

402        These observations suggest that there are mediolateral differences in migratory profiles in the E15.5  
403 cohort similar to those observed for the E13.5 and E14.5 cohorts.

#### 404 **E17.0 cohort**

405        Half a day after injection, at E17.5, labeled cells were mainly in the VZ (Figure 9C, Figure S8A).  
406 One to 1.5 days after injection, at E18.0-18.5, the main population of the labeled cells migrated out of the  
407 VZ into the MAZ (Figures 9C, D, Figures S8B, S8C). They entered the IZ two days after injection, or at  
408 E19.0 (Figure 9C, Figure S8D). In the dorsal part of the IZ/WM at P1.0, we observed a band like zone  
409 where cellular density is somewhat higher than the deeper and more superficial part of the IZ/WM  
410 (Figure 9A, inset). This slightly dense cellular zone in the IZ/WM was sandwiched by L1-positive axon  
411 bundles that are skew. At this timepoint, some of the labeled cells were found in this cellular zone in the  
412 dorsal part of the IZ/WM (Figure 9A). We also observed small number of labeled cells with single  
413 leading processes extending medially (Figure 9A, Figure S8J). Most of the labeled cells at this stage were  
414 positive for neuronal marker Hu (Figures S8J2-6). As late as P2.0, or four days after injection, labeled  
415 neurons began to migrate in the CP/GM in a bipolar morphology (Figure 9C, Figure S8F). About five or  
416 more days after injection, or later than P3.0, labeled cells settle in the PCZ, or the top of the gray matter,  
417 of the dorsal cortex (Figure 9C, Figure S8G, H). These cells obtain pyramidal morphology and became  
418 positive for NeuN by P5.0 (Figure S8I), suggesting that they were indeed mature neurons.

419        Collectively, labeled cells mainly distributed dorsally, and only a few cells settled in the dorsomedial  
420 and lateral cortex. We did not observe clear sojourning just below the dorsal and dorsolateral SP as in  
421 E13.5-15.5 cohort, but appearance of a slightly dense zone that consists of migrating neurons may suggest  
422 sojourning and/or deceleration in the midst of migration in the IZ/WM. Axon bundles just above this zone  
423 may contain axons from the SP (Figure 9A, S8E, positive for Nurr1 and Cplx3).

424        Half a day after injection, at E17.5, some strongly labeled cells with a long ascending process were  
425 scattered around the PSB (Figure S8A) as for the E15.5 cohort (Figure 7J). As early as one day after  
426 injection, at E18.0, these cells distributed throughout the cortex (Figure 9D, Figure S8B). This population  
427 was mostly negative for a radial glial marker Pax6 (Figure 9C, Figures S8A, S8B), glial lineage markers  
428 Gfap, Sox10 (Stolt et al., 2002; Zhou et al., 2000) nor Olig2 (Tatsumi et al., 2018) (except for the  
429 ventromedial cortex) (data not shown). They were, however, positive for GFP in Gad67-GFP mice  
430 (Figure 9E), suggesting that they were GABAergic interneurons. Some of these cells were positive for  
431 CGE-derived interneuron markers *Htr3a* (Murthy et al., 2014) and *Couptf2* (Kanatani et al., 2015;  
432 Kanatani et al., 2008), while others were negative, suggesting that they constitute a heterogenous  
433 population. In addition, a few of them were positive for BrdU administered at E13.5, suggesting that at  
434 least some of these cells underwent final mitosis days before E17.0. These observations raise a possibility

435 that the FT-labeled interneurons that leave the VZ earlier than the main population of FT-labeled cells are  
436 not labeled with FT at mitosis but are labeled after they become postmitotic. Labeled cells with similar  
437 morphologies were found in the MZ / Layer I and CP before the main population of the labeled cells  
438 reached the CP (Figure 9F, Figures S8C, S8D, S8E).

#### 439 **Mechanisms of regional differences in neuronal migration**

440 We finally sought to gain insight into the mechanisms of regional differences in neuronal migration.  
441 We focused on the sojourning just below the SP in the E14.5 cohort. Based on our observations in Figure  
442 2, we hypothesized that the SP neurons or some other structures in the SP transiently decelerate the  
443 migration of later-born neurons in the dorsolateral cortex. First, to see if the SP neurons regulate  
444 migration of neurons born at E14.5, we used *reeler* mice, in which SP neurons that normally position  
445 below the CP are mispositioned above the CP as revealed by *Nurr1* staining (Figures 10A, B)  
446 (Hoerder-Suabedissen et al., 2009; Ozair et al., 2018; Pedraza et al., 2014). FT labeling was performed at  
447 E14.5 and harvested the brains at E16.5. Compared to wildtype, the mediolateral migratory differences  
448 were less clear in *reeler* mice (Figures 10A, B). Next, to see if the thalamocortical axons (Bicknese et al.,  
449 1994; Molnár et al., 1998), one of the most characteristic structures in the SP (Figure 10C1), regulate  
450 neuronal migration, we used a Crispr/Cas9-based improved-Genome editing via Oviductal Nucleic Acids  
451 Delivery (i-GONAD) (Gurumurthy et al., 2019; Ohtsuka et al., 2018; Takabayashi et al., 2018) to  
452 generate *Gbx2* knockout mice (Figures S9A-A9C), which lack thalamocortical axons (Hevner et al.,  
453 2002; Miyashita-Lin et al., 1999). *Gbx2* knockout mice provide great opportunity to study the role of  
454 thalamocortical axons in regulating migration of cortical neurons specifically, because *Gbx2* is expressed  
455 in the dorsal thalamus but not in the cortex (Miyashita-Lin et al., 1999). As expected, immunoreactivity  
456 against a thalamocortical axon marker Netrin G1 (Nakashiba et al., 2002; Vue et al., 2013) was almost  
457 absent in the homozygous mice (Figure 10D1). In these mice, we performed FT labeling at E14.5 and  
458 harvested at 50 hours later. FT-labeled migrating neurons showed a migration profile almost identical to  
459 that of the control brains (Figures 10C, D), suggesting that thalamocortical axons are not likely to regulate  
460 neuronal migration around the SP. Taken together, these observations are compatible with a notion that  
461 the SP neurons or some other structures in the SP transiently decelerate the migration of later-born  
462 neurons in the dorsolateral cortex, although further analyses are warranted on other structures in the  
463 subplate and cell-autonomous regulation of neuronal migration that is dependent on cortical regions.

464

#### 465 **Discussions**

466 Using FT technology, we showed that there are clear regional differences in neuronal migration in the  
467 pallium even where there is an underlying VZ. The regional differences were dependent on the embryonic



468 stages when the apical radial glial cells divide at the ventricular surface to produce neuronal progenitors  
469 and neurons. In E10.5 and E11.5 cohorts, regional differences in neuronal migration, which is defined in  
470 the current study as movement from mitosis at the ventricular surface to settlement just beneath the  
471 meningeal surface, were not clear. In E12.5 cohort, we described slight regional differences. In E13.5,  
472 E14.5 and E15.5 cohorts, neurons in the dorsomedial cortex reached the top of the CP about one day  
473 earlier than those in the dorsolateral cortex. In E17.0 cohort, we observed that labeled neurons positioned  
474 nearly only dorsally. We also observed migratory behavior of the subpopulation of the labeled cells, for  
475 example, mitotically-active, Pax6 positive cells that leave the VZ as early as 0.5 days after labeling in  
476 E14.5 cohort (Figures 7A, I, J, Figure S6A). These comprehensive descriptions provide basic information  
477 about cortical development.

478 How are the regional differences formed? Timelapse imaging suggested that cells labeled at E14.5 in  
479 the dorsolateral cortex stop transiently below the SP while those in the dorsomedial cortex do not. It is  
480 known that the SP neurons interact with later-born neurons (Ohtaka-Maruyama et al., 2018). In *reeler*  
481 cortex, in which SP neurons are superficially mispositioned below the meninges and migrating neurons  
482 do not make contact with SP before entering the CP, mediolateral migratory difference was not clear.  
483 This observation was compatible with the idea that the SP cells transiently decelerate the migration of  
484 later-born neurons as part of normal migration. In addition to the SP neurons and thalamocortical axons,  
485 there are many other structures potentially relevant to the migratory difference; corticofugal (Denaxa et  
486 al., 2001), catecholaminergic (Lidov and Molliver, 1982) axons, and radial fibers bending (Mission et al.,  
487 1991; Saito et al., 2019) and branching (Takahashi et al., 1990) around the SP. We cannot, in addition,  
488 exclude the possibility that cell-intrinsic mechanisms of migratory neurons are also involved. Further  
489 research, including *in vivo* transplantation and specific ablation of anatomical structures, would be needed  
490 to obtain the mechanistic insight.

491 What is the physiological role of the regional differences in migratory profiles? This regional  
492 difference of migratory profiles of the E14.5 cohort was clearly visualized with FT but less clearly with  
493 thymidine analogues, a standard approach to study neurogenic gradient. We thus think that this has a  
494 biological significance different from neurogenic gradient. Migrating neurons receive synaptic contacts  
495 from the SP neurons when they pass the SP (Ohtaka-Maruyama et al., 2018). At the same stage,  
496 thalamocortical fibers wait in the SP (Lopez-Bendito and Molnar, 2003). Thus, if migrating neurons slow  
497 down beneath the dorsolateral SP, they have more chance to interact with the SP and/or thalamic afferents.  
498 Along the developmental time axis, the regional difference in neuronal migration including sojourning  
499 beneath the SP, was clear in cohorts that contain future layer IV neurons. Histologically, the dorsomedial  
500 cortex, where labeled cells did not sojourn beneath the SP clearly, is agranular and lacks layer IV. The

501 dorsolateral cortex, where cells sojourn just beneath the SP, corresponds to primary somatosensory areas,  
502 where layer IV neurons are predominant. These observations suggest a possibility that sojourning beneath  
503 the SP might be implicated in thalamocortical circuit formation and/or layer IV formation. In line with  
504 this, role of the extracellular environment is estimated to be increasingly important in refining neuronal  
505 identity as they migrate and differentiate especially in the E14-labeled future layer IV neurons (Telley et  
506 al., 2019). In addition, abnormal migration and positioning of neurons labeled at E14.0 (mainly future  
507 layer IV neurons) results in abnormal differentiation (Oishi et al., 2016a; Oishi et al., 2016b).

508 PP splitting involves the establishment of the cortical plate within the PP (Goffinet and Lyon, 1979;  
509 Marin-Padilla, 1971). It has been assumed that the cells in the earliest CP are future layer VI cells and  
510 that their active reorganization drives PP splitting (Nichols and Olson, 2010; Olson, 2014). However, it is  
511 also possible that some future SP neurons actively migrate away. In our present study of earliest cohorts,  
512 labeled cells were first observed in the PP, then in the CP and MZ upon the formation of the CP, and  
513 finally they moved down below the CP, supporting the downward movement of some SP neurons through  
514 the CP. This observation is compatible with previous descriptions using timelapse imaging or *in vivo*  
515 observations in which future SP neurons are labeled with *in utero* electroporation (Saito et al., 2019),  
516 genetically (*Lrp12/Mig13a-EGFP* mice) (Schneider et al., 2011) and immunohistochemically  
517 (*Hpca+/Reelin-* and *Eaac1+/Reelin-*)(Osheroff and Hatten, 2009). Historical studies using <sup>3</sup>H-TdR in cats  
518 (Luskin and Shatz, 1985) described that future SP neurons are transiently located in the deep part of the  
519 histologically-defined CP (Boulder-Committee, 1970) although Luskin and Shatz assumed that this is part  
520 of the SP. Altman and Bayer (Bayer and Altman, 1991) analyzed rats using <sup>3</sup>H-TdR and suggested that  
521 the SP neurons temporarily reside in the CP. These observations suggest that at least some neurons in the  
522 earliest CP and MZ are future SP neurons. Since FT might label only subpopulation of cells in our study,  
523 however, we do not exclude a possibility that some earliest born neurons form a distinct cell layer below  
524 the CP before or right after the CP formation.

525 Neurons labeled at E17.0 mainly distributed dorsally and relatively rarely medially nor laterally  
526 (Figure 9B). However, small number of cells labeled at E17.0 were observed at E18-19 in dorsomedial  
527 cortex as well. Some of them might migrate to subiculum and hippocampus; others fan out sparsely in the  
528 cingulate and secondary motor cortices. Another possibility is that they divide abventricularly to lose  
529 fluorescence. Around this stage, gliogenesis accelerates, but it was also shown that there are many  
530 *Hopx*-positive neurogenic moRG in the medial cortex at this stage (Vaid et al., 2018). Still another  
531 possibility is that they undergo programmed cell death. The fate of the majority of the dorsomedial E17.0  
532 cohort remains to be determined.

533        Interneurons are born in the ganglionic eminences and preoptic area. Ventral progenitors were also  
534 labeled with FT, but FT-labeled neurons rarely entered the cortex. This can be explained by the frequent  
535 abventricular division in the ventral forebrain (Katayama et al., 2013; Tan et al., 2016; Tan and Shi,  
536 2013) (Figures S1D, S1E). However, small number of cortical GABAergic interneurons were labeled on  
537 E17 (Figures 9D, E) and presumably on E15.5 (Figure S7J), which distributed into the cortex within a  
538 day. One interpretation for this retaining of the label in interneurons in E15.5 and E17 cohorts is that FT  
539 potentially labels a certain subpopulation that undergo final mitosis relatively late for interneurons at  
540 ventricular surface. Another interpretation is labeling of migrating interneurons that undergo final mitosis  
541 earlier than dye injection. Ventricle-directed migration of interneurons, some of which touch the  
542 ventricular surface, was described from E13 in mice and E15 in rats (Nadarajah et al., 2002). If some of  
543 the migrating interneurons had touched the ventricular surface and been labeled with FT, however,  
544 FT-labeled interneurons should have been observed in our earlier cohort as well. In our E14.5 cohort, we  
545 indeed observed some cells with long ascending processes that left the VZ earlier than the main  
546 population (Figures 7I, J). However, they were mostly positive for Pax6, a dorsal progenitor marker,  
547 suggesting that they are a different population. The origin of these interneurons labeled with FT on E15.5  
548 and E17 remains to be determined.

549        In the E14.5-15.5 cohorts, we observed cells that left the VZ within 0.5 days mainly in the  
550 dorsolateral cortex. These cells have the distribution, migratory behavior, cycling feature and morphology  
551 in common with “rapidly exiting population,” or REP, which was labeled by *in utero* electroporation and  
552 subsequent BrdU incorporation (Tabata et al., 2009). Many of these cells were positive for radial glial  
553 markers Pax6 and Sox2 (Figure 7J), supporting the view that moRG cells comprise a subpopulation of  
554 REP (Tabata et al., 2012). In the earlier cohort (labeled at E12.5, Figure 5G, Figures S4G, S4H), we also  
555 observed similar Pax6-positive population that left the VZ early. This population, however, did not share  
556 the lateral-more to medial-less gradient of the distribution of REP that we previously reported. In early  
557 stages of corticogenesis when the CP is not formed yet, migrating neurons show multipolar morphology  
558 (Hatanaka et al., 2004; Tabata and Nakajima, 2003) but they do not accumulate just above the VZ to form  
559 a clear MAZ. Because the accumulated multipolar cells were shown to serve as a fence to limit the apical  
560 border of the range of interkinetic nuclear migration (Watanabe et al., 2018), these Pax6-positive cells in  
561 our E12.5 cohort that leave the VZ soon and distribute sparsely may result from a poor fence to limit the  
562 apical border of the VZ. Conversely, we suppose that the REP and moRG in later cohorts (E14.5 and  
563 15.5) may have an active mechanism to pass the MAZ/SVZ.

564        Application of FT to visualize neuronal migration has several strengths over conventional methods.  
565 First, FT has potential to detect differences in neuronal migration that cannot be detected by thymidine

566 analogues. Second, this method enables visualization of neuronal migration of the whole brains. This  
567 feature especially goes well with whole brain 3D approach including FAST (Seiriki et al., 2017; Seiriki et  
568 al., 2019). Third, the methodology is simple, and FT can be a versatile approach to study neuronal  
569 migration in the whole brain in healthy and disease model mice. On the other hand, FT has several  
570 technical limitations. First, tangential migration of projection neurons (e.g. lateral dispersion of the  
571 rostromedial telencephalic wall-derived future SP neurons (Pedraza et al., 2014), ventral streaming of  
572 pallial-derived, early embryonic preplate neurons (Saito et al., 2019) and abnormal tangential migration  
573 of projection neurons (Pinheiro et al., 2011)) could not be efficiently visualized because FT labels mitotic  
574 cells on the ventricular surface throughout the brain. Second, the migration profile might be biased  
575 toward the slowly exiting population (SEP) (Tabata et al., 2009), or direct progeny of apical progenitors,  
576 because the fluorescence of the secondary proliferative population would decrease upon mitosis.

577 The results of FT experiments must be interpreted considering the following limitations. First, one  
578 may think that the mediolateral migratory difference is not true regional difference but a simple reflection  
579 of medially thinner cortex. But this is less likely because the regional difference was preserved in the  
580 posterior cortex, where the thickness of the cortical wall is equivalent in the dorsomedial and dorsolateral  
581 cortex (Figure 2E, Supplemental movie. 1). Second, we measured developmental stages using embryonic  
582 days, but developmental stages are confounded by neurogenic gradient, which differs about one day  
583 mediolaterally (Takahashi et al., 1999). This view is especially important to discuss the regional  
584 difference in neuronal migration of the E13.5 cohort. Cells labeled at E13.5 reached just beneath the  
585 meningeal surface at about E14.5-15.0 in the dorsomedial cortex upon the formation of the CP (Figures  
586 6B, C, F). At this stage, somal translocation was previously observed (Nadarajah et al., 2001). It is also  
587 reported that multipolar cells do not transform into bipolar locomotion cells before the CP forms  
588 (Hatanaka et al., 2004). In the dorsolateral cortex at this stage, in contrast, the CP structure is already  
589 formed, and labeled neurons need to transform from a multipolar migration mode to a bipolar locomotion  
590 mode (Figures 6C, D, G). One may reason that this difference in migratory modes determine the  
591 mediolateral differences in neuronal migration profiles. However, this is unlikely because the  
592 mediolateral regional difference was also observed in E14.5 and 15.5 cohort, when the dorsomedial CP is  
593 well developed.

594 In summary, we applied FT to describe neuronal migration and described migratory profiles of early-  
595 and late-born projection neurons in normal mouse cortical development. The labeling features of FT shed  
596 light into the hitherto overlooked regional differences of neuronal migration profiles. This versatile  
597 approach would be useful to study neuronal migration of disease models and transgenic animals.

598

599 ***Acknowledgements***

600 This work was supported by Grants-in-Aid for Scientific Research of the Ministry of Education,  
601 Culture, Sports, Science, and Technology (MEXT)/Japan Society for the Promotion of Science  
602 Grants-in-Aid for Scientific Research (KAKENHI) (JP17J05365, JP18K19379, JP19H05227,  
603 JP18K07855, JP19H01152, JP19K08306, JP20H03649, JP16H06482, JP18K19378, JP20H00492,  
604 JP19H05217, JP18H05416), the Keio Gijuku Academic Development Funds, Keio Gijuku Fukuzawa  
605 Memorial Fund for the Advancement of Education and Research, Takeda Science Foundation, and  
606 PRIME, AMED (JP19gm6310004, JP20dm0207061). S.Y. was a Research Fellow of Japan Society for  
607 the Promotion of Science from fiscal year (FY) 2017 to FY 2019.

608 We thank Drs. Ludovic Telley and Denis Jabaudon (University of Geneva) for technical advice and  
609 valuable discussions. We also thank Core Instrumentation Facility, Collaborative Research Resources,  
610 Keio University School of Medicine, Dr. Yoshifumi Takatsume, and distinguished technicians including  
611 Emiko Shimeno, Miki Sakota, Noriko Suzuki, Chisa Konno, and Maiko Saito for technical assistance.  
612 Greatest gratitude is expressed to all the members of Nakajima Lab for the valuable advice, expertise and  
613 encouragement.

614 ***Author Contributions***

615 Conceptualization, S.Y., K.K. and K.N.; Methodology, S.Y. M.T., A. Kasai., and H.H.; Investigation,  
616 S.Y., M.K., A. Kitazawa, K.I., and M.T.; Writing — Original Draft, S.Y.; Writing — Review &  
617 Editing, K.K. and K.N.; Visualization, S.Y., M.T., and A. Kasai; Supervision, K.K. and K.N.; Funding  
618 Acquisition, S.Y., A. Kasai, H.H., K.K., and K.N.

619 ***Declaration of Interests***

620 The authors declare no competing interests.

621

622 ***Figure Legends***

623 **Figure 1**

624 Characterization of cell population labeled with the FlashTag (FT) technology. **A-G:** 1 mM of 5- or  
625 6-(N-Succinimidyl)oxycarbonyl fluorescein 3',6'-diacetate (CFSE) was injected into the lateral ventricles  
626 (LV) at embryonic day (E)14 ICR mice and fixed 0.5 (A), 3.5 (B), 6.5 (C), 9.5 (D) hours later.

627 Intraperitoneal bolus injection of 5-Ethynyl-2'-deoxyuridine (EdU) was performed maternally 0.5 hours  
628 before fixation. Photomicrographs from the dorsolateral cortex were shown. In (A), FT-labeled cells  
629 positioned most apically and were often positive for phospho-histone H3 (pH3) (Figure 1F -0.5 hour,  
630 dorsolateral: 36.1± 4.0% [mean ± standard error of means], 339 cells from 5 brains; dorsomedial: 35.2 ±  
631 4.7%, 249 cells from 5 brains) but negative for EdU administered at the same time (Figure 1G, -0.5 hour,

632 dorsolateral:  $0 \pm 0\%$ , 339 cells from 5 brains; dorsomedial:  $0 \pm 0\%$ , 249 cells from 5 brains). The nuclei  
633 of EdU positive cells positioned basally in the VZ. 3.5 hours after FT injection, FT-labeled cells left the  
634 ventricular surface but still near it, and were no longer positive for pH3 (B) (Figure 1F, -3.5 hours,  
635 dorsolateral:  $2.8 \pm 0.7\%$ , 530 cells from 5 brains; dorsomedial:  $1.1 \pm 0.5\%$ , 415 cells from 5 brains). 6.5  
636 hours after labeling, almost no cells were adjacent to the lateral ventricle (C). 9.5 hours after labeling,  
637 most of the labeled cells were in about basal two thirds in the VZ and double labeled for EdU, suggesting  
638 that some of them reentered the S-phase (D) (Figure 1G, -9.5 hours, dorsolateral:  $15.9 \pm 2.5\%$ , 711 cells  
639 from 5 brains; dorsomedial:  $33.4 \pm 6.6\%$ , 546 cells from 5 brains). Schematic presentation of these  
640 experiments was shown in E. In (F), percentages of pH3+ cells out of the FT-labeled cells were shown.  
641 Magenta, pH3+ FT+/FT+ in the dorsolateral cortex. Green, pH3+ FT+/FT+ in the dorsomedial cortex. In  
642 (G), percentages of EdU+ cells out of FT-labeled cells were shown. Orange, EdU+ FT+/FT+ in the  
643 dorsolateral cortex. Blue, EdU+ FT+/FT+ in the dorsomedial cortex. **H-L:** EdU was administered 3 (I), 6  
644 (J) and 9 (K) hours before FT labeling. 0.5 hours after FT labeling, brains were harvested. Schematic  
645 presentation of these experiments was shown in (H). Nuclei of the EdU labeled cells positioned more  
646 apically in brains in which EdU was administered 3.5 hours before fixation (I) compared with A, and  
647 some of the EdU labeled cells positioned at the ventricular surface to enter M phase (interkinetic nuclear  
648 migration). In brains which EdU was administered 6.5 (J) and 9.5 (K) hours before fixation, EdU-labeled  
649 cells positioned even more apically. In these mice treated with EdU 3-9 hours prior to FT, FT-labeled  
650 cells were often co-labelled with EdU (I-K) (Figure 1L, dorsolateral, -9.5 hours:  $76.6 \pm 2.4\%$ , 328 cells  
651 from 5 brains; -6.5 hours:  $96.1 \pm 0.5\%$ , 304 cells from 5 brains; -3.5 hours:  $81.2 \pm 1.9\%$ , 263 cells from  
652 5 brains. Dorsomedial, -9.5 hours:  $65.1 \pm 1.5\%$ , 369 cells from 5 brains; -6.5 hours:  $96.7 \pm 1.2\%$ , 217  
653 cells from 5 brains; -3.5 hours:  $81.5 \pm 1.9\%$ , 287 cells from 5 brains). Note that EdU and FT never  
654 co-labeled when administered simultaneously (A). In the graph in (L), percentage of EdU+ cells out of  
655 FT-labeled cells were shown. Data for -0.5 hours in (L) corresponds to those for -0.5 hours in (G). Orange,  
656 EdU+ FT+/FT+ in the dorsolateral cortex. Blue, EdU+ FT+/FT+ in the dorsomedial cortex. **M-O:**  
657 CytoTell Blue was injected into the LV of the E12.5 (M-N) and 15.5 (O) GAD67-GFP brains. In E15.5  
658 dorsolateral cortex labeled at E12.5, most of the labeled cells (red) were in the deep part of the cortical  
659 plate (CP) (M, N). Vast majority of the labeled cells were negative for GFP (E12.5-15.5 dorsolateral  
660 cortex,  $93.3 \pm 2.5\%$ , 1653 cells from 3 brains) (N, N1-3). In postnatal day (P)1 dorsolateral cortex labeled  
661 at E15.5 (O), most of the labeled cells were found in the superficial gray matter. Again, vast majority of  
662 the labeled cells were negative for GFP (E15.5-P1,  $95.5 \pm 0.5\%$ , 1455 cells from 5 brains) (O, O1-3).  
663 Arrowheads in (N) and (O) show rare examples of cells positive for both FT and GFP.

664 EdU, 5-Ethynyl-2'-deoxyuridine; DAPI, 4',6-diamidino-2-phenylindole; FT, FlashTag; pH3,  
665 phospho-histone H3. GAD-GFP, Glutamate decarboxylase 67-green fluorescent protein, VZ, ventricular  
666 zone; MAZ, multipolar cell accumulation zone; IZ, intermediate zone; SP, subplate; CP, cortical plate;  
667 PCZ, primitive cortical zone; MZ, marginal zone; LI, cortical layer I; GM, gray matter; WM, white  
668 matter. Scale bars, 20  $\mu\text{m}$  (A-D, I-K), 50  $\mu\text{m}$  (N, O), 200  $\mu\text{m}$  (M).

669

## 670 **Figure 2**

671 Regional differences in neuronal migration in the cerebral cortex revealed by FT.

672 **A-C:** To visualize migration profile of the whole telencephalon, CFSE was injected into the ventricle of  
673 the E14.5 embryos and 5-Ethynyl-2'-deoxyuridine (EdU) was injected into the peritoneal cavity of the  
674 mother at the end of the surgery. Harvested at E16.5, many cells labeled with FT reached the superficial  
675 part of the CP in the dorsomedial cortex (cyan dotted line), while almost no cells reached the CP in the  
676 dorsolateral cortex (A, C). In the dorsolateral cortex, many neurons were just below the subplate (SP)  
677 (yellow dotted line). Such a clear difference in neuronal migration was not detected by EdU (B, C). **D:** FT  
678 labeling was performed at E14.0 and slice culture was prepared at E14.5. Labeled cells left the VZ and  
679 migrate in the MAZ in multipolar morphology (10:08-25:21). They gradually obtained polarity and  
680 migrate in the intermediate zone (20:17-30:25) and reached just below the SP (relatively dark band in the  
681 transmitted light channel, highlighted by white arrows). Neurons in the dorsomedial cortex (more medial  
682 than the magenta arrow) migrate smoothly to reach the most superficial part of the cortical  
683 plate(25:21-30:25), while in the dorsolateral cortex (more lateral than the magenta  
684 seemed to sojourn transiently below the SP (clear in the regions lateral than the magenta  
685 arrow)(30:25-35:29). These cells subsequently migrated into the CP in the locomotion mode  
686 (35:29-40:34). **E:** FAST 3D imaging of E16.5 brains in which FT labeling was performed at E14.5.  
687 Anterior and posterior representative sections were shown in addition to a section at the interventricular  
688 foramen. Supplemental Movie 1 shows a whole 3D movie taken from this brain.  
689 EdU, 5-Ethynyl-2'-deoxyuridine; DAPI, 4',6-diamidino-2-phenylindole; FT, FlashTag; IP, intraperitoneal  
690 injection; VZ, ventricular zone; MAZ, multipolar cell accumulation zone; IZ, intermediate zone; SP,  
691 subplate; CP, cortical plate; M, medial; L, lateral; D, dorsal; V, ventral. Scale bars, 200  $\mu\text{m}$ .

692

## 693 **Figure 3**

694 Cohort of cells born at E10.5.

695 **A-E:** Coronal sections of 12.5 (A), 13.5 (B) and 16.5 (C) brains labeled at E10.5. See also Figure S2 for  
696 coronal section from E11.5 to 16.5 shown with FT and DAPI. Higher magnification pictures from the

697 dorsomedial cortex and dorsolateral cortex from E11.5 to 16.5 were shown in (D) and (E), respectively.  
698 As early as E11.5, some cells were found in the preplate (PP), which was very thin in the dorsomedial  
699 cortex, as well as in the VZ (D, E, Figure S2A). At E12.5, many cells were in the PP, sometimes in a  
700 tangential morphology (A, D, E). At E13.5, the CSPG and nuclear staining showed PP splitting  
701 proceeded in a lateral-to-medial direction and the CP (asterisks) was observed in the dorsolateral cortex  
702 but not in the dorsomedial cortex (B). In the dorsomedial cortex, labeled cells were in the PP, often in  
703 somewhat round morphology (D). In the dorsolateral cortex, on the other hand, many labeled cells were  
704 located in the CP (shown with blue arrows) and MZ (E). Note that few cells were found below the CP  
705 identified by nuclear and CSPG staining (B, E, Figure S2C). At E14.5, thin CP was identified in the  
706 dorsomedial cortex as well (D, E, Figure S2D). Some labeled cells were in the deep part of the CP in the  
707 dorsomedial cortex, but many labeled cells were still in the MZ (D). In the dorsolateral cortex, many  
708 labeled cells were found near the boundary between the CP and SP (D, Figure S2D). At E15.5, labeled  
709 cells were found at the boundary between SP and CP as well as MZ in the dorsomedial cortex (D, Figure  
710 S2E, S2E'), which is similar to the dorsolateral cortex of the E14.5 (E, Figure S2D). In the E15.5  
711 dorsolateral cortex, many labeled cells were in the CSPG-positive SP (D, E, Figure S2E, S2E'). At E16.5,  
712 in both the dorsomedial and dorsolateral cortex, labeled cells were mainly found in the SP (C, D, E).  
713 Some cells were also found in the MZ (D, E, Figure S2G). Note that the CSPG staining in the SP showed  
714 some double-track immunoreactivity strong just above and below the distinct cell layer in the SP in dorsal  
715 and dorsolateral cortex at E15.5-E16.5 (E). Emergence of the labeled cells in the SP seems to coincide  
716 with this emergence of distinct layer.  
717 DAPI, 4',6-diamidino-2-phenylindole; FT, FlashTag; VZ, ventricular zone; PP, preplate; MAZ,  
718 multipolar cell accumulation zone; IZ, intermediate zone; SP, subplate; CP, cortical plate; MZ, marginal  
719 zone. Scale bars, 200  $\mu$ m (A-C) and 50  $\mu$ m (D, E).

720

#### 721 **Figure 4**

722 Cohort of cells born at E11.5.

723 **A-E:** Coronal sections of E12.5 (A), 13.0 (B) and 15.5 (C) brains labeled at E11.5. Higher magnification  
724 pictures from the dorsomedial cortex and dorsolateral cortex of E12.5 through E15.5 were shown in (D)  
725 and (E), respectively. See also Figure 3S for low magnification pictures of brains fixed at E12.5 through  
726 E15.5. At E12.0, most of the labeled cells were located in the VZ, and some cells were in the  
727 CSPG-positive PP in both the dorsomedial and dorsolateral cortex (D, E, arrowheads, Figure S3A). At  
728 E12.5 and 13.0, more labeled cells were found in the PP in both dorsomedial (A, B, D, Figures S3B, S3C)  
729 and dorsolateral cortex (A, B, E, Figures S3B, S3C). At E 13.5, in the dorsomedial cortex, where PP



730 splitting does not occur yet at this stage, many neurons reached the PP just beneath the meninges (D,  
731 Figure S3D). Many labeled cells were located in the newly formed CP and intermediate zone (IZ) in the  
732 dorsolateral cortex (E, Figure S3D). At E14.5, many cells were in the newly formed CP in both  
733 dorsomedial and dorsolateral cortex (D, E, Figure S3E). At E15.5, many cells were in the lower part of  
734 CP and, to lesser extent, MZ (C, D, E, Figures S3F, S3G, S3H). Some cells were also found in the SP in  
735 the dorsolateral cortex (C, E, Figures S3F, S3H).  
736 DAPI, 4',6-diamidino-2-phenylindole; FT, FlashTag; VZ, ventricular zone; PP, preplate; MAZ,  
737 multipolar cell accumulation zone; IZ, intermediate zone; SP, subplate; CP, cortical plate; MZ, marginal  
738 zone. Scale bars, 200  $\mu\text{m}$  (A-C) and 50  $\mu\text{m}$  (D, E).

739

#### 740 **Figure 5**

741 Cohort of cells born at E12.5.

742 **A-H:** Coronal sections of E13.0 (A), 13.5 (B), 14.0 (C), 14.5 (D), 15.5 (E), and 16.5 (F) brains labeled at  
743 E12.5. Higher magnification pictures from the dorsomedial cortex and dorsolateral cortex were shown in  
744 (G) and (H), respectively. In the dorsomedial cortex at E13.0, many labeled cells were in the VZ, but a  
745 small number of labeled cells were also found in the PP (A, G, Figure S4G). At E13.5, more labeled cells  
746 were in the PP in addition to the VZ in the dorsomedial cortex (B, G). At this stage, the incipient CP  
747 appears in the dorsolateral cortex, and many labeled neurons were migrating in the IZ (B, H). In the  
748 dorsomedial cortex of E14.0, when the incipient CP is beginning to be formed, some labeled cells reached  
749 just beneath the meningeal surface, while others seemed to be still migrating (C, G). In the dorsolateral  
750 cortex, too, many neurons reached the superficial part of the CP, while others were still migrating in the  
751 IZ and CP (C, H). At E14.5, labeled cells in the dorsomedial cortex began to be oriented radially just  
752 beneath the MZ (D, G). In the dorsolateral cortex, many strongly labeled cells were located in the cortical  
753 plate in addition to the IZ (D, H). At E 15.5, most of the labeled cells distributed not only the superficial  
754 CP, but also in the deep part of the CP in both the dorsomedial and dorsolateral CP, suggesting that some  
755 of them began to move deeper (E, G, H). At E16.5, the main population of the labeled cells was located in  
756 the somewhat deeper part of the CP in both the dorsomedial and dorsolateral cortex. In the dorsomedial  
757 cortex, many labeled cells were also distributed in the SP.

758 DAPI, 4',6-diamidino-2-phenylindole; FT, FlashTag; VZ, ventricular zone; PP, preplate; MAZ,  
759 multipolar cell accumulation zone; IZ, intermediate zone; SP, subplate; CP, cortical plate; MZ, marginal  
760 zone. Scale bars, 200  $\mu\text{m}$  (A-F), 50  $\mu\text{m}$  (G, H).

761

#### 762 **Figure 6**

763 Cohort of cells born at E13.5.  
764 **A-G:** Coronal sections of E14.0 (A), 14.5 (B), 15.0 (C), 15.5 (D) and 16.5 (E) brains labeled at E13.5.  
765 Higher magnification pictures from the dorsomedial cortex and dorsolateral cortex from E14.0-17.5 were  
766 shown in (F) and (G), respectively. Lower magnification pictures of E17.5 and E18.5 are shown in Figure  
767 S5. Coronal sections of FT-labeled brains of E14.0 through E18.5 stained with nuclear staining were also  
768 shown in Figure S5. At E14.0, most of the labeled cells were located in the VZ and zones just above the  
769 VZ in both dorsomedial and dorsolateral cortex (A, F, G). At E14.5, many labeled neurons were  
770 migrating in the IZ below the SP as revealed by immunohistochemistry for CSPG (B, F, G). At E15.0,  
771 majority of the labeled cells reached just beneath the pial surface in the dorsomedial cortex (C, F) but  
772 most of the labeled cells in the dorsolateral cortex were in the IZ below the SP (C, G). At E15.5, some of  
773 the labeled cells entered the CP while many neurons were still migrating in the IZ and SP in the  
774 dorsolateral cortex (D, G). At E16.5, most of the labeled cells in the dorsomedial cortex were located in  
775 the CP (E, F). Most of the labeled cells in the dorsolateral cortex reached the superficial part of the CP.  
776 Note that FT-labeled axon bundles were in the IZ. At E17.5, many strongly labeled neurons located in the  
777 deeper part of the CP, suggesting that later-born neurons passed through the neuronal layers that were  
778 born at E13.5 (F, G, Figure S5F, S5G).  
779 DAPI, 4',6-diamidino-2-phenylindole; FT, FlashTag; VZ, ventricular zone; PP, preplate; MAZ,  
780 multipolar cell accumulation zone; IZ, intermediate zone; SP, subplate; CP, cortical plate; MZ, marginal  
781 zone. Scale bars, 200  $\mu$ m (A-E), 50  $\mu$ m (F, G).

782

### 783 **Figure 7**

784 Cohort of cells born at E14.5.  
785 **A-J:** Coronal sections of E15.0 (A), 15.5 (B), 16.0 (C), 16.5 (D), 17.5 (E), 18.5 (F) and P0.5 (G) brains  
786 labeled at E14.5. Higher magnification pictures from the dorsomedial cortex and dorsolateral cortex were  
787 shown in (H) and (I), respectively. Higher magnification of the apical part of the dorsolateral cortical wall  
788 of E15.0 (0.5 days after injection) brains was shown in (J). At E15.0, most of the labeled cells were  
789 located in the VZ in both dorsomedial and dorsolateral cortex (A, H, I). Some labeled cells were located  
790 outside of the VZ in the dorsolateral cortex (A, I, J) but such cells were not frequently found in the  
791 dorsomedial cortex (A, H). The labeled cells that were located basally often had a long ascending process  
792 (red arrowheads, J, left) as well as some retraction bulb (blue arrowheads) and were immunoreactive for  
793 Pax6, Sox2 and Ki-67 (yellow arrowheads, J, right). Note that the ascending processes were so long that  
794 it was difficult to observe full length in the IZ crowded with radial fibers, which are also labeled with FT.  
795 At E15.5, majority of the labeled neurons were located in the MAZ in the multipolar morphology in both

796 the dorsomedial and dorsolateral cortex (B, H, I). At E16.0, most of the labeled cells were in the IZ (C, H,  
797 I). At E16.5 in the dorsomedial cortex, many cells reached the most superficial part of the CP (D, H). In  
798 the dorsolateral CP, on the other hand, most of the labeled cells were migrating in the IZ just beneath the  
799 SP (D, I; see also Figures 2A, C). At E17.5 in the dorsomedial cortex, vast majority of the labeled cells  
800 were located in the primitive cortical zone (PCZ), which is the most superficial part of the CP (E, H). In  
801 the dorsolateral cortex, most of the labeled cells were still migrating in the CP (E, I). At E18.5 in the  
802 dorsomedial cortex, labeled cells were distributed not only in the PCZ, but also in the slightly deeper part  
803 of the CP as NeuN-positive mature neurons (F, H). In the dorsolateral cortex, majority of the labeled cells  
804 were located in the PCZ (F, I). At P0.5 in the dorsolateral cortex, many labeled cells were distributed in  
805 the slightly deeper part of the CP as NeuN-positive mature neurons (G). Small double headed arrows  
806 show PCZ.  
807 DAPI, 4',6-diamidino-2-phenylindole; FT, FlashTag; VZ, ventricular zone; MAZ, multipolar cell  
808 accumulation zone; IZ, intermediate zone; SP, subplate; CP, cortical plate; PCZ, primitive cortical zone;  
809 MZ, marginal zone. Scale bars, 200  $\mu\text{m}$  (A-G), 50  $\mu\text{m}$  (H, I), 10  $\mu\text{m}$  (J).

810

### 811 **Figure 8**

812 Cohort of cells labeled at E15.5.

813 **A-B:** Coronal sections of E16.0, 16.5, 17.0, 17.5, 18.5, P0.5 and P1.5 brains labeled at E15.5. Data from  
814 the dorsomedial cortex and dorsolateral cortex were shown in (A) and (B), respectively. See Figure S7 for  
815 low magnification pictures. Figure S7 shows the same sections shown with immunohistochemistry  
816 helpful to define histology. At E16.0, most of the labeled cells were in the VZ (A, B, Figures S7A, S7H,  
817 S7I). Some labeled cells, often positive for Pax6, were outside of the VZ (B, Figure S7A, S7I)  
818 (arrowheads). One day (E16.5; A, B, Figures S7B, S7H, S7I) and 1.5-2 days (E17.0-17.5; A, B, Figures  
819 S6C, S6D, S6H, S6I) after injection, most of the labeled cells were in the MAZ and IZ, respectively. At  
820 E17.5, most of the labeled cells were migrating in the superficial and deep part of the IZ in the  
821 dorsomedial cortex (A, Figures S7D, S7H). In the dorsolateral cortex, migrating cells were mainly in the  
822 rather deep part of the IZ (B, Figure S7D, S7I). At E18.5 in the dorsomedial cortex, most of the labeled  
823 cells the PCZ (A, Figure S7E, S7H). In the dorsolateral cortex, on the other hand, only the small  
824 population of the labeled cells reached the PCZ and others were still migrating in the CP and SP in a  
825 locomotion morphology (B, Figures S7E, I). At P0.5, vast majority of the labeled cells settled in the PCZ  
826 in the dorsomedial cortex (A, Figures S7F, S7H). In the dorsolateral cortex, too, many labeled cells  
827 reached the PCZ (B, Figures S7F, I). At P1.5, labeled cells labeled at E15.5 settled in the gray matter in

828 the dorsolateral cortex (B, Figures S7G, H, I). Some of these labeled cells changed their position slightly  
829 apically to leave from the PCZ in the dorsolateral cortex (B, Figures S7G, H, I).  
830 DAPI, 4',6-diamidino-2-phenylindole; FT, FlashTag; VZ, ventricular zone; MAZ, multipolar cell  
831 accumulation zone; IZ, intermediate zone; SP, subplate; CP, cortical plate; PCZ, primitive cortical zone;  
832 MZ, marginal zone; PSB, pallial-subpallial boundary; LI, cortical layer I (LI in the IZ is an axonal  
833 marker); GM, gray matter; WM, white matter. Scale bars, 50  $\mu$ m.

834

835 **Figure 9**

836 Cohort of cells labeled at E17.0.

837 **A-C:** Coronal section of P1.0 (A) and P5.0 (B) brains labeled at E17.0. See also Figure S8 for lower  
838 magnification pictures of E17.5 through P5. Higher magnification pictures of E17.5 through P5 from the  
839 dorsal cortex were shown in (C). At E17.5, most of the labeled cells were located in the VZ (C). At E18.0,  
840 most of the labeled cells were located in the VZ and MAZ (C). Small number of labeled cells were also  
841 found throughout the cortex sparsely. At E18.5, many labeled cells were in the MAZ (C). Some labeled  
842 cells sparsely distributed throughout the cortex. At E19.0, many cells entered the LI-positive IZ dorsally  
843 (C). Small number of cells were also found in the MZ and CP (F). At P1.0, many labeled cells were  
844 migrating in the IZ / white matter (A, C). Migrating cells formed a slightly dense cellular structure (inset  
845 in A) sandwiched by LI-positive axon bundles (arrowheads in A). At P2.0, many neurons were migrating  
846 in the CP/cortical gray matter with a locomotion morphology (C). At P3.0, many labeled cells reached the  
847 dorsal PCZ (C). At P5.0, most of the labeled cells were located in the most superficial part of the cortical  
848 gray matter (B, C). Note that many cells were located in the dorsal (and dorsolateral) cortex (the yellow  
849 dotted line), and few cells were located in the dorsomedial and lateral cortices. **D-F:** Analyses of  
850 GABAergic interneurons. Cells labeled with FT (CytoTell Blue) at E17.0 sparsely distributed throughout  
851 the cortex at E18.0 (D, E), and they were mostly positive for GFP in GAD67-GFP mice (E). Labeled cells  
852 with similar morphologies were found in the MZ / Layer I and CP at E19.0 before the main population of  
853 the labeled cells reach the CP (F).

854 DAPI, 4',6-diamidino-2-phenylindole; FT, FlashTag; VZ, ventricular zone; MAZ, multipolar cell  
855 accumulation zone; IZ, intermediate zone; SP, subplate; CP, cortical plate; PCZ, primitive cortical zone;  
856 MZ, marginal zone; PSB, pallial-subpallial boundary; LI, cortical layer I; GM, gray matter; WM, white  
857 matter. Scale bars, 200  $\mu$ m (A, B, D), 50  $\mu$ m (C, E), 10  $\mu$ m (F). \* indicated another brain on the same  
858 slide glass.

859

860 **Figure 10**

861 Regional differences in neuronal migration in *reeler* mutants and *Gbx2* *-/-* mice.  
862 **A-B:** In wildtype brains, Nurr1+ cells were observed in the SP (A), while in *reeler* mice, Nurr1+ cells  
863 were mostly observed in the superplate, or beneath the meninges (B). In contrast to wildtype mice clearly  
864 showing regional differences in neuronal migration (A), regional differences were not clear in *reeler* mice  
865 (B). FT was performed at E14.5 and fixed at E16.5. **C-D:** In *Gbx2* *+/-* brain, Netrin G1-positive  
866 thalamocortical axons run the SP (C1). In *Gbx2* *-/-* brain, Netrin G1-positive thalamocortical axons were  
867 almost absent in the cortex (C2). In both cases, many neurons were observed just beneath the SP. FT was  
868 performed at E14.5 and fixed 50 hour later. Coronal sections slightly caudal to the main part of the  
869 interventricular foramina were shown to evaluate the thalamus at the same sections.  
870 DAPI, 4',6-diamidino-2-phenylindole; FT, FlashTag; VZ, ventricular zone; MAZ, multipolar cell  
871 accumulation zone; IZ, intermediate zone; SP, subplate; CP, cortical plate; M, medial; L, lateral; D,  
872 dorsal; V, ventral. Scale bars, 200  $\mu$ m.

873

#### 874 ***Supplemental Figure Legends***

875 **Figure S1**, related to Figure 1

876 Characterization of cell population labeled with FT.

877 A: The definition of “dorsomedial”, “dorsal” and “dorsolateral” cortex in the current study. B: The  
878 schematic presentation of histological zones in this study. See the *histological terminology* section in the  
879 materials and methods for discussion. C: CytoTell Blue was injected into the LV of the E12.5  
880 GAD67-GFP brains. A coronal section of E15.5 brains slightly caudal to the section shown in Figure 1M  
881 was shown. In the “reservoir” (Altman & Bayer, 1991), there were many migrating cells that were mostly  
882 negative for GFP (C1-C3). More ventrally, labeled cells were identified in the caudal amygdaloid stream  
883 (CAS), and were negative for GFP (C4-C6). Arrowheads show rare examples of cells positive for both  
884 FT and GFP. D-E. Immunohistochemistry against pH3 was performed in E13.5 (D) and E14.5 (E) wild  
885 type brains in which CFSE was injected at E12.5. Abventricular mitosis labeled by pH3 was abundant in  
886 the ganglionic eminences (D, E). In the medial ganglionic eminence (MGE) at E13.5, many FT-labeled  
887 cells were observed in the VZ and apical half of the SVZ (D). At E14.5, when FT-labeled interneurons  
888 enter the cortex when fluorescent dyes were injected into the parenchyma of the ganglionic eminences  
889 (data not shown), FT-labeled cells were again observed in the VZ and apical half of the SVZ (E). Note  
890 that relatively small number of cells migrated in the deep part of the SVZ of the MGE and in the  
891 presumptive pallidum, and that few labeled cells with interneuron-like morphology was observed in the  
892 cortex. F. CytoTell Blue was injected to parenchyma of the ganglionic eminence (GE) of the

893 heterozygous GAD67-GFP mice at E12.5. Asterisk in (F) indicates the injection site retrospectively  
894 identified. Strongly labeled cells distributed in the whole hemispheres, especially in the SVZ and  
895 marginal zone (MZ) (F, F1). They often showed tangential morphology and were positive for GFP  
896 (F1-F10).  
897 DAPI, 4',6-diamidino-2-phenylindole; FT, FlashTag; GAD-GFP, Glutamate decarboxylase 67-green  
898 fluorescent protein, VZ, ventricular zone; MAZ, multipolar cell accumulation zone; IZ, intermediate  
899 zone; SP, subplate; CP, cortical plate; PCZ, primitive cortical zone; MZ, marginal zone; LI, cortical layer  
900 I; GM, gray matter; WM, white matter; PSB, pallial-subpallial boundary; MGE, medial ganglionic  
901 eminence; LGE, lateral ganglionic eminence; Ctx, cortex. Scale bars, 200  $\mu\text{m}$  (C, D, E, F), 50  $\mu\text{m}$  (F1),  
902 20  $\mu\text{m}$  (C1-6).

903

904 **Figure S2**, related to Figure 3

905 Cohort of cells born at E10.5.

906 A-F: Coronal sections of 11.5 (A, A'), 12.5 (B), 13.5 (C), 14.5 (D, D'), 15.5 (E, E') and 16.5 (F) brains  
907 labeled at E10.5. See also Figure 3 for higher magnifications. As early as E11.5, some cells were found in  
908 the preplate (PP), which was very thin in the dorsomedial cortex, as well as in the VZ (A, A'). At E12.5,  
909 many cells were in the PP (B). In the dorsomedial cortex at E13.5, labeled cells were in the PP (C). In the  
910 dorsolateral cortex, on the other hand, many labeled cells were located in the CP and MZ (C). At E14.5,  
911 thin CP was identified in the dorsomedial cortex as well (D, D'). Some labeled cells were in the deep part  
912 of the CP in the dorsomedial cortex, but many labeled cells were in the MZ (D, D'). In the dorsolateral  
913 cortex, many labeled cells were found near the boundary between the CP and SP (D, D'). At E15.5,  
914 labeled cells were found at the boundary between SP and CP as well as MZ in the dorsomedial cortex (E),  
915 which is similar to the dorsolateral cortex of the E14.5 (D). In the E15.5 dorsolateral cortex, many labeled  
916 cells were in the CSPG-positive SP (E, E'). At E16.5, in both the dorsomedial and dorsolateral cortex,  
917 labeled cells were mainly found in the SP (F). Some cells were also found in the MZ (F). G: At E16.5, in  
918 both the dorsomedial and dorsolateral cortex, labeled cells were mainly found in the SP and were  
919 Tbr1-positive. Some cells were also found in the MZ and were positive for Reelin, suggesting that they  
920 were Cajal-Retzius neurons.

921 DAPI, 4',6-diamidino-2-phenylindole; FT, FlashTag; SP, subplate; CP, cortical plate; MZ, marginal zone.  
922 Scale bars, 200  $\mu\text{m}$  (A-F) and 50  $\mu\text{m}$  (G).

923

924 **Figure S3**, related to Figure 4

925 Cohort of cells born at E11.5.

926 A-F: Coronal sections of E12.0 (A), E12.5 (B), E13.0 (C), E13.5 (D), E14.5 (E) and E15.5 (F) brains  
927 labeled at E11.5. See the legend for Figure 4 for explanation. G-H: Immunohistochemistry against Ctip2  
928 and CSPG of E15.5 brains in which FT was performed at E11.5. Images (G) (dorsomedial) and (H)  
929 (dorsolateral) were taken from insets in Figures 4D and E, respectively. At E15.5, many cells were in the  
930 lower part of CP and, to lesser extent, MZ. Some cells were also found in the SP in the dorsolateral cortex.  
931 Most of the labeled cells in the CP at E15.5 were positive for Ctip2, a deep layer marker.  
932 DAPI, 4',6-diamidino-2-phenylindole; FT, FlashTag; SP, subplate; CP, cortical plate; MZ, marginal zone.  
933 Scale bars, 200  $\mu\text{m}$  (A-F), 20  $\mu\text{m}$  (G, H).

934

935 **Figure S4**, related to Figure 5

936 Cohort of cells born at E12.5.

937 **A-F:** Coronal sections of E13.0 (A), 13.5 (B), 14.0 (C), 14.5 (D), 15.5 (E), and 16.5 (F) brains labeled at  
938 E12.5 shown with nuclear staining. See the legend for Figure 5 for explanation. **G-H:** Single optical  
939 slices of E 13.0 brains taken from the dorsomedial and dorsolateral cortices were shown in (G) and (H),  
940 respectively. In the dorsomedial cortex at E13.0, many labeled cells were in the VZ, but a small number  
941 of labeled cells were also found in the PP (Figure 5A, G). The latter cells were often weakly positive for  
942 Pax6 (G, arrowheads). In the dorsolateral cortex, many labeled cells were located in regions just above  
943 the VZ in addition to the VZ, and they are often negative for Pax6 (H; arrows). FT+ / Pax6+ cells outside  
944 of the VZ were relatively rare (H, an arrowhead).  
945 DAPI, 4',6-diamidino-2-phenylindole; FT, FlashTag; PP, preplate; VZ, ventricular zone; MAZ,  
946 multipolar cell accumulation zone. Scale bars, 200  $\mu\text{m}$  (A-F) and 10  $\mu\text{m}$  (G, H).

947

948 **Figure S5**, related to Figure 6

949 Cohort of cells born at E13.5.

950 **A-E:** Coronal sections of E14.0 (A), 14.5 (B), 15.0 (C), 15.5 (D) and 16.5 (E) brains labeled at E13.5 and  
951 stained with DAPI. See the legend for Figure 6 for explanation. **F-G:** Coronal sections of E17.5 (A) and  
952 18.5 (B) brains labeled at E13.5. At E17.5, many strongly labeled neurons located in the rather deep part  
953 of the CP in the dorsomedial and dorsolateral cortices (Figure 6). Even at this stage, in the most lateral  
954 part of the cortex, many labeled cells were still migrating radially or about to leave the reservoir (R)  
955 (Bayer and Altman, 1991) (F1). Labeled cells were also found in the caudal amygdaloid stream (CAS)  
956 (F2). At E18.5, labeled cells were distributed in the CP but not in the SP (G).  
957 DAPI, 4',6-diamidino-2-phenylindole; FT, FlashTag; Pir, piriform cortex; Ins, insular cortex. Scale bars,  
958 200  $\mu\text{m}$  (A-F, F1, G), 50  $\mu\text{m}$  (F2).

959

960 **Figure S6**, related to Figure 7

961 Cohort of cells born at E14.5.

962 **A-G:** Coronal sections of E15.0 (A), 15.5 (B), 16.0 (C), 16.5 (D), 17.5 (E), 18.5 (F) and P0.5 (G) brains

963 labeled at E14.5. Images for FT and nuclear staining are shown. See also the legend of Figure 7 for

964 explanation. **H:** A coronal section of a P7 brain in which FT labeling and intraperitoneal BrdU injection

965 was performed at E14.5. In the dorsolateral cortex, FT labeled cells mainly distributed in the layer IV. In

966 dorsomedial and lateral cortex, FT labeled cells mainly distributed in the layer II/III. BrdU positive cells

967 were mainly detected in the superficial layers.

968 DAPI, 4',6-diamidino-2-phenylindole; FT, FlashTag; VZ, ventricular zone; MAZ, multipolar cell

969 accumulation zone; IZ, intermediate zone; SP, subplate; CP, cortical plate; PCZ, primitive cortical zone;

970 MZ, marginal zone. Scale bars, 200  $\mu$ m.

971

972 **Figure S7**, related to Figure 8

973 Cohort of cells labeled at E15.5.

974 **A-J:** Coronal sections of E16.0 (A), 16.5 (B), 17.0 (C), 17.5 (D), 18.5 (E), P0.5 (F) and P1.5 (G) brains

975 labeled at E15.5. Higher magnification pictures from the dorsomedial cortex and dorsolateral cortex were

976 shown in (H) and (I), respectively. Higher magnification of the pallial-subpallial boundaries (PSB) of

977 E16.0 (0.5 day after injection) brains was shown in (J). See Figure 8 for legends. At E16.0, around the

978 pallial-subpallial boundary (PSB), small number of labeled cells were in the IZ and CP with a long

979 leading process (J).

980 DAPI, 4',6-diamidino-2-phenylindole; FT, FlashTag; VZ, ventricular zone; MAZ, multipolar cell

981 accumulation zone; IZ, intermediate zone; SP, subplate; CP, cortical plate; PCZ, primitive cortical zone;

982 MZ, marginal zone; PSB, pallial-subpallial boundary; LI, cortical layer I (LI in the IZ is an axonal

983 marker); GM, gray matter; WM, white matter. Scale bars, 200  $\mu$ m (A-G), 50  $\mu$ m (H-J).

984

985 **Figure S8**, related to Figure 9

986 Cohort of cells labeled at E17.0.

987 **A-I:** Coronal section of E17.5 (A), 18.0 (B), 18.5 (C), 19.0 (D), P1.0 (E), P2.0 (F), P3.0 (G) and P5.0 (H)

988 brains labeled at E17.0. Higher magnification pictures from these brains are shown in Figure 9C. At

989 E17.5, most of the labeled cells were located in the VZ (A). Some of the labeled cells scattered in the

990 brain parenchyma (arrowheads in A). At E18.0, most of the labeled cells were located in the VZ and

991 MAZ (B). Again, small number of labeled cells distributed throughout the cortex (arrowheads in B). At



992 E18.5, many labeled cells were in the MAZ (C). Some labeled cells sparsely distributed throughout the  
993 cortex. At E19.0, many cells entered the L1-positive IZ dorsally (D). At P1.0, many labeled cells were  
994 migrating in the IZ (E). Migrating cells were migrating in a zone sandwiched by L1-positive axon  
995 bundles (Figure 9A). This zone was deeper than the SP, as visualized by Nurr1 and Cplx3, SP neuron  
996 markers. At P2.0, many neurons were migrating in the CP/cortical gray matter with a bipolar morphology  
997 (F). At P3.0, many labeled cells reached the dorsal PCZ (G). At P5.0, most of the labeled cells were  
998 located in the most superficial part of the cortical gray matter (H), and were positive for NeuN (I). **J:** At  
999 P1.0, labeled cells were migrating dorsally, as well as ventrally (to the hippocampus) and, to lesser extent,  
1000 medially. Some labeled cells were also found in the VZ/SVZ. Most of these were positive for a neuronal  
1001 marker Hu (J2-J6).

1002 DAPI, 4',6-diamidino-2-phenylindole; FT, FlashTag; IZ, intermediate zone; SP, subplate; CP, cortical  
1003 plate. Scale bars, 200  $\mu\text{m}$  (A-H, J1), 50  $\mu\text{m}$  (J2-3), 20  $\mu\text{m}$  (J4-6), 10  $\mu\text{m}$  (I).

1004

1005 **Figure S9**, related to Figure 10

1006 Generation of *Gbx2* knockout mice using Crispr/Cas9

1007 **A:** A schematic diagram of our strategy to make a deletion of a region which contains a homeobox  
1008 domain. Key concepts of this strategy were based on mice generated in a previous study (Wassarman et  
1009 al., 1997). Animals with an allele in which a region between Target 1 and Target 2 was deleted were  
1010 screened by a band shift in electrophoresis of the PCR products, and further confirmed by sequencing.

1011 **B-C:** Direct sequencing of the PCR products amplified from the G0 mice (B, Target 1; C, Target 2).

1012

1013 **Supplemental movie 1**, related to Figure 2E

1014 Whole-brain imaging of migrating neurons. FT labeling was performed at E14.5, fixed about two days  
1015 later and stained the nuclei with Hoechst. The movie shows series of coronal sections i) in the  
1016 posterioranterior (PA) direction from the occipital pole of the cortex to the frontal pole (FT only), ii) back  
1017 in the AP direction slightly past the level of interventricular foramen (FT + Hoechst), iii) in the PA  
1018 direction to the presumptive frontal cortex (FT only), and iv) in the AP direction slightly past the  
1019 interventricular foramen (FT + Hoechst).

1020

1021 **Materials and Methods**

1022 **KEY RESOURCES TABLE**

| REAGENT or RESOURCE | SOURCE | IDENTIFIER |
|---------------------|--------|------------|
|---------------------|--------|------------|

| Antibodies                              |                  |                                      |
|-----------------------------------------|------------------|--------------------------------------|
| mouse monoclonal anti-BrdU              | BD Biosciences   | Cat# 347580;<br>RRID:AB_2313824      |
| goat polyclonal anti-Brn2               | Santa Cruz       | Cat# sc-6029;<br>RRID:AB_2167385     |
| mouse monoclonal anti-COUP2 (H7147)     | R&D              | Cat# PP-H7147-00;<br>RRID:AB_2155627 |
| rabbit polyclonal anti-Cplx3            | Synaptic Systems | Cat# 122 302;<br>RRID:AB_2281240     |
| mouse monoclonal anti-CSPG (IgM; CS-56) | Abcam            | Cat# ab11570;<br>RRID:AB_298176      |
| rat monoclonal anti-CTIP2 (25B6)        | Abcam            | Cat# ab18465;<br>RRID:AB_2064130     |
| goat polyclonal anti-fluorescein        | Abcam            | Cat# ab6655;<br>RRID:AB_305628       |
| chick polyclonal anti-GFAP              | Abcam            | Cat# ab4674;<br>RRID:AB_304558       |
| mouse monoclonal anti-Hu (16A11)        | Molecular Probes | Cat# A-21271;<br>RRID:AB_221448      |
| rabbit polyclonal anti-KI67             | Lab Vision       | Cat# RB-1510-P1;<br>RRID:AB_60160    |
| rat monoclonal anti-L1 (clone 324)      | Chemicon         | Cat# MAB5272;<br>RRID:AB_2133200     |
| mouse monoclonal anti-Map2 (AP20)       | Santa Cruz       | Cat# sc-32791;<br>RRID:AB_627948     |
| Goat polyclonal anti-Netrin G1          | R&D              | Cat# AF1166;<br>RRID:AB_2154822      |
| rabbit polyclonal anti-NeuN             | Millipore        | Cat# ABN78;<br>RRID:AB_10807945      |
| goat polyclonal anti-Nurr1              | R&D              | Cat# AF2156;<br>RRID:AB_2153894      |

|                                                                                     |                                   |                                           |
|-------------------------------------------------------------------------------------|-----------------------------------|-------------------------------------------|
| goat polyclonal anti-OLIG2 (biotin-conjugated)                                      | R&D                               | Cat# BAF2418;<br>RRID:AB_2251803          |
| rabbit polyclonal anti-Pax6                                                         | Covance                           | Cat# PRB-278P;<br>RRID:AB_291612          |
| rabbit polyclonal anti-phosphohistone H3 (Ser10)                                    | Upstate                           | Cat# 06-570; cf.<br>RRID:AB_310177        |
| mouse monoclonal anti-Reelin (G10)                                                  | Abcam                             | Cat# ab78540;<br>RRID:AB_1603148          |
| goat polyclonal anti-SOX10                                                          | R&D                               | Cat# AF2864,<br>RRID:AB_442208            |
| goat polyclonal anti-SOX2                                                           | Santa Cruz                        | Cat# sc-17320,<br>RRID:AB_2286684         |
| rabbit polyclonal anti-Tbr1                                                         | Abcam                             | Abcam Cat#<br>ab31940,<br>RRID:AB_2200219 |
| Chemicals and Proteins                                                              |                                   |                                           |
| 5- or 6-(N-Succinimidyl)oxycarbonyl fluorescein<br>3',6'-diacetate (Cellstain CFSE) | Dojindo Molecular<br>Technologies | Cat# C309                                 |
| CytoTell Blue                                                                       | AAT Bioquest                      | Cat# 22251                                |
| Dimethyl sulfoxide                                                                  | Sigma-Aldrich                     | Cat# D2650                                |
| Hepes-buffered saline                                                               | Sigma-Aldrich                     | Cat# 51558                                |
| Ritodrine hydrochloride                                                             | WAKO                              | Cat# R3477                                |
| 5-ethynyl-2'-deoxyuridine (EdU)                                                     | Invitrogen                        | Cat# A10044                               |
| 5-bromo-2'-deoxyuridine (BrdU)                                                      | Sigma-Aldrich                     | Cat# B5002                                |
| Alt-R® S.p. Cas9 Nuclease V3, 100 µg                                                | Integrated DNA<br>Technologies    | Cat# 1081058                              |
| Critical Commercial Assays                                                          |                                   |                                           |
| Click-iT™ Plus EdU Cell Proliferation Kit for Imaging,<br>Alexa Fluor™ 555 dye      | Invitrogen                        | Cat# C10638                               |
| Experimental Models: Organisms/Strains                                              |                                   |                                           |
| wildtype ICR mice                                                                   | Japan SLC                         | RRID:MGI:5462094                          |
| Wildtype C57BL/6Njcl mice                                                           | CLEA Japan                        | RRID:MGI:5659218                          |

|                                                                                         |                             |                                                                                                |
|-----------------------------------------------------------------------------------------|-----------------------------|------------------------------------------------------------------------------------------------|
| <i>GAD67-GFP</i> (□ <i>Neo</i> ) mice (Tamamaki et al., 2003)                           | A gift from Dr. Yanagawa    | RRID:IMSR_RBR C03674                                                                           |
| <i>B6CFe a/a-Relnrl/J</i> mice                                                          | Jackson Laboratory          | RRID:IMSR_JAX:00 0235                                                                          |
| <i>Gbx2</i> knockout mice                                                               | This manuscript             |                                                                                                |
| Oligonucleotides                                                                        |                             |                                                                                                |
| A probe set for mouse <i>Htr3a</i> (NM_013561.2, probe number = 30)                     | Molecular Instruments       | N/A, <a href="https://www.molecularinstruments.com/">https://www.molecularinstruments.com/</a> |
| fluorescence-labeled hairpins (B5-AlexaFluor647)                                        | Molecular Instruments       | N/A, <a href="https://www.molecularinstruments.com/">https://www.molecularinstruments.com/</a> |
| crRNA for <i>Gbx2</i> mutant, protospacer sequence for Target 1:<br>UUUCAGUCGGGCUGUCCGA | Integrated DNA Technologies | N/A, <a href="https://sg.idtdna.com/pages">https://sg.idtdna.com/pages</a>                     |
| crRNA for <i>Gbx2</i> mutant, protospacer sequence for Target 2:<br>UCAUUAGACGGGCUAAAGG | Integrated DNA Technologies | N/A, <a href="https://sg.idtdna.com/pages">https://sg.idtdna.com/pages</a>                     |
| Alt-R® CRISPR-Cas9 tracrRNA, 100 nmol                                                   | Integrated DNA Technologies | Cat# 1072534                                                                                   |
| <i>Gbx2</i> primer, forward:<br>CAGGAAATCGCAATGTGTTAATGTGG                              | Integrated DNA Technologies | N/A, <a href="https://sg.idtdna.com/pages">https://sg.idtdna.com/pages</a>                     |
| <i>Gbx2</i> primer, reverse:<br>TCAAACACTGCAGCTGAGATCC                                  | Integrated DNA Technologies | N/A, <a href="https://sg.idtdna.com/pages">https://sg.idtdna.com/pages</a>                     |
| Software and Algorithms                                                                 |                             |                                                                                                |
| CHOPCHOP                                                                                | (Labun et al., 2019)        | RRID:SCR_015723, <a href="http://chopchop.cbu.uib.no/">http://chopchop.cbu.uib.no/</a>         |
| Fiji                                                                                    | (Schindelin et al., 2012)   | RRID:SCR_002285, <a href="https://imagej.net/Fiji">https://imagej.net/Fiji</a>                 |

|                         |                            |                                                                                                         |
|-------------------------|----------------------------|---------------------------------------------------------------------------------------------------------|
| LAS-X software          | Leica                      | RRID:SCR_013673                                                                                         |
| Microsoft Excel for Mac | Microsoft                  | RRID:SCR_016137                                                                                         |
| Python 3.6              | Python Software Foundation | RRID:SCR_008394,<br><a href="https://www.python.org/">https://www.python.org/</a>                       |
| Imaris 8.4.1            | Oxford Instruments         | RRID:SCR_007370,<br><a href="https://imaris.oxinst.com/packages">https://imaris.oxinst.com/packages</a> |

1023

1024 **Lead Contact**

1025 Further information and requests for resources and reagents should be directed to and will be fulfilled by  
1026 the Lead Contact, Kazunori Nakajima (kazunori@keio.jp).

1027 **RESOURCE AVAILABILITY**

1028 ***Materials Availability***

1029 This study did not generate new unique reagents. We did not deposit the *Gbx2* knockout mice generated  
1030 in the present study, because they were designed based on a mouse line *Gbx2*<sup>tm1Mrt</sup> (MGI:3665450) used  
1031 in a previous study (Wassarman et al., 1997). Requests for the mice should be directed to the Lead  
1032 Contact.

1033 ***Data and Code Availability***

1034 This study did not generate/analyze datasets or code.

1035 **EXPERIMENTAL MODEL AND SUBJECT DETAILS**

1036 ***Animals.***

1037 Pregnant wildtype ICR (RRID:MGI:5462094) and C57BL/6Njcl mice (RRID:MGI:5659218) were  
1038 purchased from Japan SLC (Shizuoka, Japan) and CLEA Japan (Tokyo, Japan). *GAD67-GFP* ( $\Delta$ Neo)  
1039 mice (Tamamaki et al., 2003) were provided by Dr. Yanagawa (Gunma University, Gunma, Japan), and  
1040 heterozygous progenies were backcrossed to wild type ICR mice. Heterozygous males were mated with  
1041 wild type ICR mice and used in the experiments. *Reeler* mice (B6CFe *a/a-ReI<sup>n</sup>/J*;  
1042 RRID:IMSR\_JAX:000235) were obtained from the The Jackson Laboratory and maintained by mating  
1043 heterozygous females with homozygous males. The day on which a vaginal plug was detected was  
1044 considered embryonic day (E) 0. Dams, pups, and weaned animals were kept under a 12/12-hour  
1045 light/dark cycle in a temperature-controlled room. The animals had free access to food and water.  
1046 Embryos and pups of both sexes were indiscriminately analyzed, because sexes cannot be

1047 macroscopically determined. All animal experiments were performed according to the Institutional  
1048 Guidelines on Animal Experimentation at Keio University.

#### 1049 **METHOD DETAILS**

##### 1050 *FT Surgical procedures*

1051 Pregnant mice were deeply anesthetized, and their intrauterine embryos were manipulated as described  
1052 previously (Nakajima et al., 1997). FT was performed as described as previously (Telley et al., 2016)  
1053 with some modification. 10 mM 5- or 6-(N-Succinimidyl)oxycarbonyl fluorescein 3',6'-diacetate  
1054 (Cellstain CFSE, C309, Dojindo Molecular Technologies, Inc., Kumamoto, Japan) working stock was  
1055 prepared by dissolving CFSE in Dimethyl sulfoxide (DMSO) (Hybri-Max™, Sigma-Aldrich, St. Luis,  
1056 MO). The working solution was further diluted with 1X HEPES-buffered saline (HBS) to make 1 mM  
1057 solution just before surgery. The solution was colored with Fast Green (final concentration 0.01-0.05%)  
1058 to monitor successful injection. In experiments using GAD67-GFP mice, CytoTell Blue (22251, AAT  
1059 Bioquest, Sunnyvale, CA) was used instead of CFSE. About 0.5 µl of the prepared FT solution was  
1060 injected into the lateral ventricle. Trans-illumination method (Shimogori and Ogawa, 2008) was utilized  
1061 to visualize small embryos of E10.5 and 11.5. At these early stages, 200 µl of 0.1 mg/ml Ritodrine  
1062 hydrochloride (WAKO, now FUJIFILM Wako Pure Chemical Corporation, Osaka, Japan) was injected  
1063 intraperitoneally to relax myometrium (Nishiyama et al., 2012; Takeo, 2016; Takeo et al., 2015). After  
1064 applying plenty of phosphate-buffered saline (PBS) into the abdominal cavity and onto the surface of  
1065 manipulated uterine horns, injected embryos were placed back into the abdominal cavity.

##### 1066 *Administration of thymidine analogues*

1067 EdU and BrdU (Sigma) was dissolved in PBS at 5 mg/mL and 10 mg/mL, respectively. Bolus  
1068 intraperitoneal injection of EdU or BrdU solution was performed at 25 µg/g body weight (BW) and 50  
1069 µg/gBW, respectively.

##### 1070 *Histological terminology*

1071 The VZ and SVZ was determined according to the definition provided by Boulder's Committee  
1072 (Boulder-Committee, 1970). Because the VZ is a pseudostratified columnar epithelium, their nuclei, by  
1073 definition, are mostly oriented radially. The basal border of the VZ nuclei was also able to be determined  
1074 by a radial glial marker Pax6 staining (Englund et al., 2005) or acute administration of a thymidine  
1075 analogue (Tabata et al., 2012) because the nuclei of radial glia in the S-phase occupies a basal zone of the  
1076 VZ (interkinetic nuclear migration). Just above the VZ is a zone that we previously named the MAZ  
1077 (Tabata et al., 2009), where multipolar cells that have just exited the VZ transiently accumulate. The cell  
1078 density of this zone is high, and nuclei are randomly oriented (Bayer and Altman, 1991; Yoshinaga et al.,  
1079 2012). Although many cells in the MAZ are postmitotic (Tabata et al., 2009), there are some cycling cells

1080 in the MAZ. The MAZ and the lower part of the SVZ, which is originally characterized by abventricular  
1081 cells with proliferative activity by Boulder's Committee, overlaps. Just above the MAZ is a zone rich in  
1082 L1-positive axonal fibers (Yoshinaga et al., 2012) and somata of the immature migrating neurons. We  
1083 called this zone the IZ according to the Boulder's Committee's suggestion. The SP layer, which was  
1084 described after Boulder's Committee defined histological terminology, was excluded from the IZ in the  
1085 current study, because the main component is relatively mature subplate neurons. The original description  
1086 by the Boulder Committee defined the IZ and SVZ as distinct regions, but because we observe many  
1087 proliferative cells in the axon-rich area (Tabata et al., 2009; Vaid et al., 2018) (Figures 1A-D), the IZ in  
1088 our definition and the SVZ inevitably overlaps. Collectively, the SVZ starts from the MAZ extending into  
1089 the IZ in our definition. We therefore preferred the use of the MAZ and IZ to describe neuronal migration  
1090 more precisely, except for contexts stressing abventricular mitosis. We defined the SP according to the  
1091 cytoarchitectonic criteria and presence of abundant CSPG (Bicknese et al., 1994). The CP was  
1092 determined by cytoarchitectonic criteria (high cellularity, radial orientation of the nuclei (Olson, 2014))  
1093 and/or weak immunoreactivity of CSPG (Bicknese et al., 1994). The primitive cortical zone, or PCZ  
1094 (Sekine et al., 2011; Shin et al., 2019), was determined by weak or lack of NeuN staining in the CP. The  
1095 marginal zone was determined by cytoarchitectonic criteria—most superficial, hypocellular zones just  
1096 above the CP. Before the formation of the CP, the zone between proliferative zone (i.e. the VZ at this  
1097 stage) and the meningeal surface was named as the PP (Bystron et al., 2008), although this area might  
1098 include intermediate progenitors (Vasistha et al., 2015) as well. Cytoarchitecture changes as development  
1099 proceeds, which is summarized in Figure S1B.

1100 The definition of dorsomedial, dorsal and dorsolateral cortex in the coronal sections was provided in  
1101 Figure S1A. We obtained images at the rostrocaudal axis of foramina of Monro unless otherwise  
1102 specified. We obtained dorsolateral high magnification images from regions the lateral borders of which  
1103 cross the pallial-subpallial angles. We obtained dorsomedial high magnification images from regions  
1104 adjacent to the medial protrusion of the lateral ventricles. In most of cases the images were corrected so  
1105 that the apicobasal axes are parallel to a line that passes medial protrusion of the lateral ventricles and  
1106 ipsilateral pallial-subpallial angles. In the late stages of cortical development, the dorsomedial high  
1107 magnification images were shown with dorsal-up because lines that pass medial protrusion of the lateral  
1108 ventricles and ipsilateral pallial-subpallial angles are no longer parallel to the apicobasal axes nor  
1109 perpendicular to the meningeal surfaces.

#### 1110 ***Histological sample preparation.***

1111 The harvested embryonic brains were fixed by immersing in 4% paraformaldehyde (PFA) at 4°C with  
1112 gentle agitation for 1 hour to overnight. The postnatal embryos were perfused with ice-cold 4% PFA, and

1113 their brains were further fixed by immersing in 4% paraformaldehyde (PFA) at 4°C with gentle agitation  
1114 for several hours to overnight. The brains were cryoprotected by immersing in 20% and 30% sucrose in  
1115 PBS at 4°C for several hours to overnight sequentially, embedded in 75% O.C.T. compound (Sakura,  
1116 Tokyo, Japan) (O.C.T: 30% sucrose = 3:1) and frozen with liquid nitrogen. Brains were cryosectioned  
1117 coronally by 20 µm thick on MAS-coated slide glass (MAS-02; Matsunami Glass Ind.,Ltd., Osaka,  
1118 Japan)

1119 For immunohistochemistry, sections were immersed with PBS with 0.01% Triton X-100  
1120 (Sigma-Aldrich, St. Louis, MO) (PBS-Tx) for more than 30 minutes at room temperature (RT). Antigen  
1121 retrieval was performed in most of the experiments by incubating in 1x HistoVT ONE (NACALAI  
1122 TESQUE, INC., Kyoto, Japan) at 70°C for 20 minutes. To detect BrdU, sections were treated with a  
1123 sodium citrate buffer (pH 6) at 105°C for 5 minutes and with 2 M hydrogen chloride at 37°C for 30  
1124 minutes. The sections were blocked with 10% normal goat serum in PBS-Tx at RT, and incubated with  
1125 the primary antibody overnight at 4°C. After washing with PBS-Tx for three times, the sections were  
1126 incubated with secondary antibodies for 1 hour at RT. The details of the primary antibodies are shown in  
1127 Key Resource Table and the antibody characterization section.

1128 Histological detection of EdU was performed using Click-iT™ EdU Cell Proliferation Kit for  
1129 Imaging, Alexa Fluor™ 555 dye (C10338, Thermo Fisher Scientific) according to the manufacturer's  
1130 protocol.

1131 When nuclear staining was performed without immunohistochemistry, sections were immersed  
1132 with PBS for more than 30 minutes at RT and incubated with 2.5 ng/µl of 4',6-diamidino-2-phenylindole  
1133 (DAPI; D3571; Thermo Fisher Scientific, Waltham, MA) or 0.5 µM of TO-PRO3 Iodide (T3605, Thermo  
1134 Fisher Scientific) at RT for 1 hour. When nuclear staining was performed with immunohistochemistry,  
1135 DAPI was added to the secondary antibody solution. Sections were mounted using PermaFluor  
1136 (TA-030-FM; Thermo Fisher Scientific).

### 1137 ***Antibody Characterization***

1138 The antibodies used in this study were listed in Key Resource Table. The mouse anti-BrdU antibody  
1139 (clone B44) (Tabata et al., 2009) was used to detect nuclei of cells that were in the S phase when BrdU  
1140 was administered. This antibody is derived from hybridization of mouse Sp2/0-Ag14 myeloma cells with  
1141 spleen cells from BALB/c mice immunized with iodouridine-conjugated ovalbumin (manufacturer's  
1142 datasheet and a previous report (Gratzner, 1982)). This antibody detects BrdU (but not thymidine) in  
1143 single-stranded DNA, free BrdU, or BrdU coupled to a protein carrier. The antibody also reacts with  
1144 iodouridine, which was not used in this study.



1145 An anti-Brn2 antibody was used as a layer II/III/V marker (Oishi et al., 2016a). This antibody was  
1146 raised against a peptide mapping at the C-terminus of *BRN2* of human origin (manufacturer's datasheet).  
1147 Although previous study suggested that this antibody detects both Brn1 and Brn2 in western blotting  
1148 (Yamanaka et al., 2010), we believe that this antibody predominantly detects Brn2 in  
1149 immunohistochemistry of perinatal cortical slices, because electroporation of a shRNA against *Brn2*  
1150 significantly diminished immunoreactivity of this antibody but not of anti-Brn1 antibody while  
1151 electroporation of a shRNA against *Brn1* did not significantly diminish immunoreactivity of this antibody  
1152 in immunohistochemistry (Oishi et al., 2016a). Even if this antibody detects Brn1 as well, its expression  
1153 pattern is similar to that of Brn2 in the developing cerebral cortex and the use of this antibody as a layer  
1154 marker would be justified.

1155 An anti-COUP-TF II antibody was used to label CGE- and PoA-derived interneurons (Kanatani et al.,  
1156 2015; Kanatani et al., 2008). This mouse monoclonal antibody was raised against recombinant human  
1157 COUP-TF II (amino acids 43-64) (manufacturer's datasheet). The specificity of this antibody was  
1158 previously confirmed by absence of immunohistochemical staining in a *Couptf2* conditional knockout  
1159 tissue (Suh et al., 2006).

1160 An anti-Cplx3 antibody was used to label the SP in the postnatal stage (Hoerder-Suabedissen et al.,  
1161 2009). This antibody was raised against recombinant mouse Complexin3 (amino acids 1-158)  
1162 (manufacturer's datasheet). The specificity of this antibody was previously confirmed by absence of  
1163 signals in a *Cplx3* knockout tissue in immunohistochemistry and western blotting (Reim et al., 2009).

1164 An anti-CSPG antibody was used to label the PP, MZ and SP (Bicknese et al., 1994). This antibody  
1165 was well characterized elsewhere (Yi et al., 2012).

1166 *Ctip2/Bcl11b* was used as a deep layer marker (Arlotta et al., 2005). Anti-CTIP2 rat monoclonal  
1167 antibody was raised against a fusion protein corresponding to human CTIP2 (amino acids 1-150). This  
1168 antibody detects 2 bands representing *Ctip2* at about 120kD (manufacturer's datasheet). This antibody  
1169 detected nuclear staining in wildtype mice while no signals in *Ctip2*-null mice on immunohistochemistry  
1170 (Zhang et al., 2012).

1171 A goat anti-fluorescein antibody was used to boost FT signals when brains were analyzed days after  
1172 FT injection and fluorescent labeling was weak. This antibody was raised against fluorescein conjugated  
1173 to goat IgG. Western blotting detected BSA conjugated fluorescein (manufacturer's datasheet). This  
1174 antibody enhanced fluorescence from FT-labeled cells, but no signal was detected in untreated (CFSE  
1175 was not injected) brains (data not shown).

1176 A mouse anti-Hu monoclonal antibody was used as a neuronal marker (Marusich et al., 1994; Tabata  
1177 and Nakajima, 2003). This antibody was raised against a human HuD peptide

1178 (QAQRFRLDNLN-C)-Keyhole Limpet Hemocyanin conjugate, and recognizes HuC, HuD and HuDpro  
1179 in western blotting (Marusich et al., 1994). This antibody showed immunoreactivity similar to human  
1180 anti-Hu autoantibody in western blotting of human neuron extract, which was blocked by synthetic HuD  
1181 peptide (Marusich et al., 1994).

1182 A rabbit anti-Ki-67 polyclonal antibody was used to label proliferating cells. This antibody was raised  
1183 against a synthetic peptide from the human Ki-67 protein. Immunohistochemistry of human lymph nodes  
1184 resulted in nuclear staining of germinal center (manufacturer's datasheet). Proliferating reactive  
1185 astrocytes (Chen et al., 2017) and colorectal carcinoma foci (Zhao et al., 2017) were reported to be  
1186 specifically labeled. Immunohistochemistry of developing mouse cortex resulted in nuclear staining of  
1187 the proliferative zones including VZ and SVZ, as previously published (Watanabe et al., 2018).

1188 L1 immunohistochemistry was performed to label the IZ rich in axons including thalamocortical and  
1189 corticofugal axons (Fukuda et al., 1997; Kudo et al., 2005; Yoshinaga et al., 2012). The antibody used  
1190 was raised against glycoprotein fraction from cerebellum of 8-10 day old C57BL/6J mice. The same  
1191 clone from the previous vendor did not stain fiber bundles in the *L1*-null mice (Fransen et al., 1998).

1192 An anti-Map2 monoclonal antibody [AP20] was used as a subplate marker (Ohtaka-Maruyama et al.,  
1193 2013; Ohtaka-Maruyama et al., 2018). This antibody was raised against cow MAP-2 (amino acids  
1194 997-1332), and detects bands corresponding to MAP2A/B on western blotting (manufacturer's datasheet).  
1195 Immunohistochemistry of developing mouse cortex resulted in an identical staining pattern previously  
1196 reported with other antibody against MAP2 (AB5622; Merck Millipore) (Ohtaka-Maruyama et al., 2013;  
1197 Ohtaka-Maruyama et al., 2018).

1198 Netrin G1 immunohistochemistry was used to mark thalamocortical axons (Nakashiba et al., 2002).  
1199 The anti-Netrin G1a antibody was raised against purified insect cell line *Sf*21-derived recombinant  
1200 mouse Netrin-G1a (rmNetrin-G1a) (manufacturer's datasheet). Mouse Netrin-G1a specific IgG was  
1201 purified by mouse Netrin-G1a affinity chromatography. Manufacturer's datasheet states that this antibody  
1202 shows less than 2% cross-reactivity with rmNetrin-1, rchNetrin-2 and rhNetrin-4. Cortical  
1203 immunoreactivity was lost in *Gbx2* conditional knockout mice, in which thalamocortical axons failed to  
1204 innervate (Vue et al., 2013).

1205 NeuN immunohistochemistry was used to label neuronal cells. The anti-NeuN antibody used was an  
1206 affinity purified rabbit polyclonal antibody raised against GST-tagged recombinant mouse NeuN  
1207 N-terminal fragment (ABN78, Millipore) (manufacturer's datasheet). This antibody is a rabbit polyclonal  
1208 version of anti NeuN antibody (mouse monoclonal, MAB377, Millipore, clone A60), and has been  
1209 widely used as a neuronal marker by authors of many different literatures [e.g. (Ataka et al., 2013; Huang  
1210 et al., 2015; Lundgaard et al., 2015).] Immunohistochemistry of *Rbfox3/NeuN*-null tissue using this

1211 antibody and the mouse monoclonal antibody (clone A60) , which also has been widely used as a  
1212 neuronal marker and was extensively characterized by western blotting and 2D electrophoresis (Lind et  
1213 al., 2005), detected no signals (Lin et al., 2018). Double immunohistochemistry using ABN78 and A60  
1214 resulted in an identical staining pattern.

1215 A goat anti-Nurr1 antibody was used to label the SP neurons. This antibody was raised against *E.*  
1216 *coli*-derived recombinant mouse Nurr1 (Val332-Lys558) (manufacturer's datasheet), and reported to  
1217 detect the nuclei of the SP neurons (Hoerder-Suabedissen et al., 2009; Ozair et al., 2018; Pedraza et al.,  
1218 2014). No signal was detected in *Nurr1*-deficient mice (data not shown).

1219 A rabbit polyclonal anti-phospho-histone H3 antibody (Ser10) (06-570, Upstate, Spartanburg, SC)  
1220 was used to label mitotic cells (Hendzel et al., 1997; Kim et al., 2017). This antibody was raised against a  
1221 short peptide from the amino-terminus of H3 from amino acids 7-20 (A7RKSTGGKAPRKQL20C)  
1222 synthesized containing a single phosphorylated serine at position 10 (Hendzel et al., 1997). This antibody  
1223 detected a single band in whole cell protein and acid-soluble nuclear protein from Colcemid-treated  
1224 mitotic Hela cells but did not detect in whole cell protein and acid-soluble nuclear protein from interphase  
1225 enriched preparation (Hendzel et al., 1997).

1226 A rabbit anti-Pax6 antibody was used to label radial glial cells. This antibody was raised against a  
1227 peptide (QVPGSEPDMSQYWPRQLQ) derived from the C-terminus of the mouse Pax-6. Western blotting  
1228 of mouse Raw264.7 cells detects a single band (manufacturer's datasheet). In the cerebellum of chimera  
1229 mice made from wildtype and Pax6-null cells, nuclear immunoreactivity was detected in wildtype  
1230 granular cells while no signal was detected in Pax6 null cells (Swanson and Goldowitz, 2011). In our  
1231 study, nuclear immunoreactivity was detected in the majority of the VZ cells (Englund et al., 2005) and  
1232 small number of extra-VZ cells, as expected (Shitamukai et al., 2011; Vaid et al., 2018).

1233 Reelin was used as a marker for Cajal-Retzius cells (Ogawa et al., 1995). Anti-Reelin monoclonal  
1234 antibody[G10] was raised against a recombinant fusion protein, corresponding to amino acids 164-496 of  
1235 Mouse Reelin. This antibody detects an expected 388kDa band on western blotting (manufacturer's  
1236 technical information). On immunohistochemistry, this antibody detected Cajal-Retzius cells in the  
1237 marginal zone in the developing wildtype cortex but no signal was detected in the *reeler* cortex except for  
1238 blood vessels (Ishii et al., 2019), confirming its specificity.

1239 A goat anti-Sox2 polyclonal antibody was used to label nuclei of radial glia. This antibody is an  
1240 affinity purified antibody raised against a peptide mapping near the C-terminus of human SOX2. Western  
1241 blotting of human and mouse embryonic stem cells detected a single band at 34 kDa (manufacturer's  
1242 datasheet). Immunohistochemistry of developing mouse (Vaid et al., 2018; Watanabe et al., 2018) and  
1243 human cortex (Nowakowski et al., 2016) resulted in labeling of radial glial cells in the VZ and SVZ.

1244 Tbr1 has been widely used as a marker for postmitotic neurons of the PP, SP and deep layer (Hevner  
1245 et al., 2001). The detailed information about the antibody used in the current study was described  
1246 elsewhere (Betancourt et al., 2014).

1247 A chicken anti-GFAP antibody was used to label astrocytes. This chicken polyclonal IgY antibody  
1248 was raised against a recombinant full-length protein corresponding to Human GFAP, isotype 1. Western  
1249 blotting of mouse and rat cortical lysates detected a single band (manufacturer's datasheet). A number of  
1250 studies have used this antibody to label astrocytes (Saliu et al., 2014). In GFAP-Cre driven GFP  
1251 transgenic mice, immunoreactivity from this antibody showed excellent colocalization with GFP signals  
1252 (Suarez-Mier and Buckwalter, 2015), confirming its specificity.

1253 A goat anti-SOX10 antibody and goat anti-OLIG2 antibody was used to label oligodendrocyte (Stolt  
1254 et al., 2002; Zhou et al., 2000) progenitors and oligodendrocyte + astrocyte progenitors (Tatsumi et al.,  
1255 2018), respectively. The anti-SOX10 antibody was raised against *E. coli*-derived recombinant human  
1256 SOX10 (Met1-Ala118) (manufacturer's datasheet) and has been widely used to label cells of the  
1257 oligodendrocyte lineage in many literatures including mouse spinal cord (Kelenis et al., 2018) and dorsal  
1258 cortex (Winkler et al., 2018) in immunohistochemistry. The anti-OLIG2 antibody used in this study was  
1259 raised against *E. coli*-derived recombinant human SOX10 (Met1-Ala118). In Western blots, less than 5%  
1260 cross-reactivity with recombinant human (rh) OLIG1 and rhOLIG3 is observed, according to the  
1261 manufacturer's technical information. This antibody has been used to label cells of the glial progenitors  
1262 on immunohistochemistry (Tabata et al., 2009).

### 1263 *in situ* HCR

1264 Fluorescent *in situ* hybridization was performed using *in situ* HCR v3.0 (Choi et al., 2018). E18.0 brains  
1265 in which FT was performed at E17.0 were perfused with ice-cold 4% PFA and post-fixed overnight at  
1266 4°C. Brains were embedded in 3% low-melting agarose gel and vibratomed by 100 µm thick. Brain slices  
1267 were preserved at -20°C in a cryoprotectant solution (30% w/v sucrose, 1% w/v polyvinyl-pyrrolidone  
1268 (PVP)-40, 30% v/v Ethylene glycol in PBS) until use. Brain slices were washed in PBS for 5 minutes at  
1269 RT, and incubated in a hybridization solution (Molecular Instruments, Los Angeles, CA) at 37°C in a  
1270 96-well plate with agitation (a round shaker, 200rpm). The probe set for mouse *Htr3a* (NM\_013561.2,  
1271 probe number = 30) was designed by and purchased from Molecular Instruments. Brain slices were  
1272 incubated with 4 nM probes overnight at 37°C with agitation. After washing with a prewarmed wash  
1273 solution (Molecular Instruments) for 15 minutes three times at 37°C with agitation and with 5x SSC with  
1274 0.1% Tween20 (5x SSCT) for 5 minutes three times at RT with agitation, sections were incubated with  
1275 fluorescence-labeled hairpins (B5-AlexaFluor647) reconstituted with an amplification solution  
1276 (Molecular Instruments) overnight at RT with agitation. After washing with 5x SSCT for more than 5

1277 minutes three times at RT with agitation and counterstaining with DAPI, brain slices were mounted using  
1278 PermaFluor on MAS-coated slide glasses. This resulted in essentially the same staining pattern as  
1279 previously described (Murthy et al., 2014).

#### 1280 ***Image Acquisition of glass slide samples***

1281 The fluorescence images were acquired through confocal laser scanning microscopes (FV1000; Olympus,  
1282 Tokyo, Japan & TCS SP8; Leica, Wetzlar, Germany). Stitching was performed with LAS-X software  
1283 (Leica) (RRID:SCR\_013673) equipped with the Leica confocal microscope, when necessary. Images  
1284 were analyzed with Fiji (RRID:SCR\_002285) (Schindelin et al., 2012). Linear changes in tone and  
1285 background subtraction were made. Maximum projection images of optical slices were made to show the  
1286 entire morphology of the whole cortical wall. Single optical slices were shown to evaluate colocalization  
1287 of signals of different channels.

#### 1288 ***Whole-brain imaging and generation of 3D image movies***

1289 Three-dimensional imaging of a whole brain was performed using block-face serial microscopy  
1290 tomography (FAST) (Seiriki et al., 2017; Seiriki et al., 2019) with some modification. Briefly, brains  
1291 were perfused with ice-cold PBS and ice-cold 4% PFA. The harvested brains were post-fixed for one  
1292 week at 4°C. The fixed brains were stained with Hoechst33258 (Seiriki et al., 2019) and embedded in the  
1293 previously reported 4% oxidized agarose (Ragan et al., 2012). Subsequently, whole-brain images were  
1294 obtained at a spatial resolution of  $1.0 \times 1.0 \times 5.0 \mu\text{m}^3$ . The resulting section images were stitched by  
1295 FASTitcher, written in Python 3.6 (Seiriki et al., 2019). We generated 3D-rendered movies from 2D  
1296 stacks of serial stitched images using Imaris 8.4.1 (Bitplane, Belfast, UK).

#### 1297 ***Time-Lapse Analyses***

1298 Time-lapse observations of slice culture were performed using a previously described (Tabata and  
1299 Nakajima, 2003). Briefly, coronal brain slices (200  $\mu\text{m}$  thick) were cultured in Neurobasal medium (NB)  
1300 containing 2% B27 (Invitrogen) on MilliCell-CM culture plate inserts (PICM03050; Merck KGaA,  
1301 Darmstadt, Germany). The dishes were then mounted in a CO<sub>2</sub> incubator chamber (40% O<sub>2</sub>, 65% N<sub>2</sub>, 5%  
1302 CO<sub>2</sub> at 37°C) fitted onto a confocal microscope TCS SP8. Approximately 10-20 optical Z sections were  
1303 obtained automatically every 30 minutes. Photobleaching was linearly corrected afterward to maintain  
1304 signal strength of the labeled cells using Fiji to enable visual evaluation of migration profiles.

#### 1305 ***i-GONAD***

1306 CRISPR guide RNAs were designed using CHOPCHOP (Labun et al., 2019). The synthetic crRNAs,  
1307 tracrRNA, and Cas9 protein were commercially obtained as Alt-R™ CRISPR guide RNAs from  
1308 Integrated DNA Technologies (Coralville, IA) and Alt-R™S.p. Cas9 Nuclease V3. Adult ICR mice were  
1309 purchased from Japan SLC. Females in estrus were mated with stud males. Females used were not

1310 superovulated. Surgical procedures for i-GONAD were performed as described previously with minor  
1311 modifications (Gurumurthy et al., 2019; Ohtsuka et al., 2018) at around E0.7 under deep anesthesia.  
1312 Mixture of 15  $\mu$ M gRNA for Target 1, 15  $\mu$ M gRNA for Target 2, and 1  $\mu$ g/ $\mu$ l Cas9 protein was prepared  
1313 in Opti-MEM. 0.02% Fast Green was used to monitor successful injection. Approximately 1.5  $\mu$ l of  
1314 electroporation solution was injected into the oviduct from upstream of the ampulla using a glass  
1315 micropipette. The electroporation was performed using NEPA21 (NEPA GENE, Tokyo, Japan) (poring  
1316 pulse: 50 V, 5 ms pulse, 50 ms pulse interval, 4 pulses, 10% decay, single pulse orientation and transfer  
1317 pulse: 10 V, 50 ms pulse, 50 ms pulse interval, 3 pulses, 40% decay,  $\pm$  pulse orientation). Animals  
1318 carrying the expected deletion were mated with wildtype ICR mice.

### 1319 **QUANTIFICATION AND STATISTICAL ANALYSIS**

1320 Histological samples were evaluated by visual inspection. Careful anatomical, qualitative analyses  
1321 were performed in most of the experiments. All quantitative data presented are expressed as arithmetic  
1322 mean  $\pm$  SEM, and the exact values of n (number of brains) are provided in the Results section and Figure  
1323 Legends. Descriptive statistics values, including mean, SEM and percentage, were calculated using  
1324 Microsoft Excel for Mac (RRID:SCR\_016137). No hypothesis tests were conducted.

1325

### 1326 *References*

1327 Anderson, S.A., Eisenstat, D.D., Shi, L., and Rubenstein, J.L. (1997). Interneuron migration from basal  
1328 forebrain to neocortex: dependence on Dlx genes. *Science* 278, 474-476.  
1329 Angevine, J.B., Jr., and Sidman, R.L. (1961). Autoradiographic study of cell migration during  
1330 histogenesis of cerebral cortex in the mouse. *Nature* 192, 766-768.  
1331 Arlotta, P., Molyneaux, B.J., Chen, J., Inoue, J., Kominami, R., and Macklis, J.D. (2005). Neuronal  
1332 subtype-specific genes that control corticospinal motor neuron development in vivo. *Neuron* 45, 207-221.  
1333 Ataka, K., Asakawa, A., Nagaishi, K., Kaimoto, K., Sawada, A., Hayakawa, Y., Tatezawa, R., Inui, A.,  
1334 and Fujimiya, M. (2013). Bone marrow-derived microglia infiltrate into the paraventricular nucleus of  
1335 chronic psychological stress-loaded mice. *PLoS One* 8, e81744.  
1336 Bayer, S.A., and Altman, J. (1991). *Neocortical development* (Raven Press New York).  
1337 Betancourt, J., Katzman, S., and Chen, B. (2014). Nuclear factor one B regulates neural stem cell  
1338 differentiation and axonal projection of corticofugal neurons. *J Comp Neurol* 522, 6-35.  
1339 Bicknese, A.R., Sheppard, A.M., Leary, D.D., and Pearlman, A.L. (1994). Thalamocortical axons extend  
1340 along a chondroitin sulfate proteoglycan- enriched pathway coincident with the neocortical subplate and  
1341 distinct from the efferent path. *The Journal of Neuroscience* 14, 3500.

- 1342 Boulder-Committee (1970). Embryonic vertebrate central nervous system: revised terminology. The  
1343 Boulder Committee. *Anat Rec* 166, 257-261.
- 1344 Brodmann, K. (1909). Vergleichende Lokalisationslehre der Großhirnrinde : in ihren Prinzipien  
1345 dargestellt auf Grund des Zellenbaues (J.A. Barth).
- 1346 Bystron, I., Blakemore, C., and Rakic, P. (2008). Development of the human cerebral cortex: Boulder  
1347 Committee revisited. *Nat Rev Neurosci* 9, 110-122.
- 1348 Bystron, I., Rakic, P., Molnar, Z., and Blakemore, C. (2006). The first neurons of the human cerebral  
1349 cortex. *Nat Neurosci* 9, 880-886.
- 1350 Caviness, V.S., Jr., Takahashi, T., and Nowakowski, R.S. (1995). Numbers, time and neocortical  
1351 neuronogenesis: a general developmental and evolutionary model. *Trends Neurosci* 18, 379-383.
- 1352 Chen, J., He, W., Hu, X., Shen, Y., Cao, J., Wei, Z., Luan, Y., He, L., Jiang, F., and Tao, Y. (2017). A  
1353 role for ErbB signaling in the induction of reactive astrogliosis. *Cell Discov* 3, 17044.
- 1354 Choi, H.M.T., Schwarzkopf, M., Fornace, M.E., Acharya, A., Artavanis, G., Stegmaier, J., Cunha, A.,  
1355 and Pierce, N.A. (2018). Third-generation in situ hybridization chain reaction: multiplexed, quantitative,  
1356 sensitive, versatile, robust. *Development* 145.
- 1357 Denaxa, M., Chan, C.-H., Schachner, M., Parnavelas, J.G., and Karagogeos, D. (2001). The adhesion  
1358 molecule TAG-1 mediates the migration of cortical interneurons from the ganglionic eminence along the  
1359 corticofugal fiber system. *Development* 128, 4635.
- 1360 Englund, C., Fink, A., Lau, C., Pham, D., Daza, R.A., Bulfone, A., Kowalczyk, T., and Hevner, R.F.  
1361 (2005). Pax6, Tbr2, and Tbr1 are expressed sequentially by radial glia, intermediate progenitor cells, and  
1362 postmitotic neurons in developing neocortex. *J Neurosci* 25, 247-251.
- 1363 Fietz, S.A., Kelava, I., Vogt, J., Wilsch-Brauninger, M., Stenzel, D., Fish, J.L., Corbeil, D., Riehn, A.,  
1364 Distler, W., Nitsch, R., and Huttner, W.B. (2010). OSVZ progenitors of human and ferret neocortex are  
1365 epithelial-like and expand by integrin signaling. *Nat Neurosci* 13, 690-699.
- 1366 Fransen, E., D'Hooge, R., Van Camp, G., Verhoye, M., Sijbers, J., Reyniers, E., Soriano, P., Kamiguchi,  
1367 H., Willemsen, R., Koekkoek, S.K., *et al.* (1998). L1 knockout mice show dilated ventricles, vermis  
1368 hypoplasia and impaired exploration patterns. *Hum Mol Genet* 7, 999-1009.
- 1369 Fujita, S. (1963). The matrix cell and cytogenesis in the developing central nervous system. *J Comp*  
1370 *Neurol* 120, 37-42.
- 1371 Fukuda, T., Kawano, H., Ohyama, K., Li, H.-P., Takeda, Y., Oohira, A., and Kawamura, K. (1997).  
1372 Immunohistochemical localization of neurocan and L1 in the formation of thalamocortical pathway of  
1373 developing rats. *J Comp Neurol* 382, 141-152.

- 1374 Goffinet, A.M., and Lyon, G. (1979). Early histogenesis in the mouse cerebral cortex: A Golgi study.  
1375 *Neurosci Lett* 14, 61-66.
- 1376 Govindan, S., Oberst, P., and Jabaudon, D. (2018). In vivo pulse labeling of isochronic cohorts of cells in  
1377 the central nervous system using FlashTag. *Nat Protoc* 13, 2297-2311.
- 1378 Gratzner, H.G. (1982). Monoclonal antibody to 5-bromo- and 5-iododeoxyuridine: A new reagent for  
1379 detection of DNA replication. *Science* 218, 474.
- 1380 Gurumurthy, C.B., Sato, M., Nakamura, A., Inui, M., Kawano, N., Islam, M.A., Ogiwara, S.,  
1381 Takabayashi, S., Matsuyama, M., Nakagawa, S., *et al.* (2019). Creation of CRISPR-based  
1382 germline-genome-engineered mice without ex vivo handling of zygotes by i-GONAD. *Nat Protoc* 14,  
1383 2452-2482.
- 1384 Hansen, D.V., Lui, J.H., Parker, P.R., and Kriegstein, A.R. (2010). Neurogenic radial glia in the outer  
1385 subventricular zone of human neocortex. *Nature* 464, 554-561.
- 1386 Hatanaka, Y., Hisanaga, S., Heizmann, C.W., and Murakami, F. (2004). Distinct migratory behavior of  
1387 early- and late-born neurons derived from the cortical ventricular zone. *J Comp Neurol* 479, 1-14.
- 1388 Haubensak, W., Attardo, A., Denk, W., and Huttner, W.B. (2004). Neurons arise in the basal  
1389 neuroepithelium of the early mammalian telencephalon: a major site of neurogenesis. *Proc Natl Acad Sci*  
1390 *U S A* 101, 3196-3201.
- 1391 Hendzel, M.J., Wei, Y., Mancini, M.A., Van Hooser, A., Ranalli, T., Brinkley, B.R., Bazett-Jones, D.P.,  
1392 and Allis, C.D. (1997). Mitosis-specific phosphorylation of histone H3 initiates primarily within  
1393 pericentromeric heterochromatin during G2 and spreads in an ordered fashion coincident with mitotic  
1394 chromosome condensation. *Chromosoma : Zeitschrift für Zellkern-und Chromosomenforschung* 106,  
1395 348-360.
- 1396 Hevner, R.F., Miyashita-Lin, E., and Rubenstein, J.L. (2002). Cortical and thalamic axon pathfinding  
1397 defects in *Tbr1*, *Gbx2*, and *Pax6* mutant mice: evidence that cortical and thalamic axons interact and  
1398 guide each other. *J Comp Neurol* 447, 8-17.
- 1399 Hevner, R.F., Shi, L., Justice, N., Hsueh, Y., Sheng, M., Smiga, S., Bulfone, A., Goffinet, A.M.,  
1400 Campagnoni, A.T., and Rubenstein, J.L. (2001). *Tbr1* regulates differentiation of the preplate and layer 6.  
1401 *Neuron* 29, 353-366.
- 1402 Hicks, S.P., and D'Amato, C.J. (1968). Cell migrations to the isocortex in the rat. *Anat Rec* 160, 619-634.
- 1403 His, W. (1889). *Die Neuroblasten und deren Entstehung im embryonalen Mark*, Vol 15 (S. Hirzel).
- 1404 Hoerder-Suabedissen, A., and Molnár, Z. (2015). Development, evolution and pathology of neocortical  
1405 subplate neurons. *Nature Reviews Neuroscience* 16, 133.



- 1406 Hoerder-Suabedissen, A., Wang, W.Z., Lee, S., Davies, K.E., Goffinet, A.M., Rakic, S., Parnavelas, J.,  
1407 Reim, K., Nolic, M., Paulsen, O., and Molnar, Z. (2009). Novel markers reveal subpopulations of  
1408 subplate neurons in the murine cerebral cortex. *Cereb Cortex* 19, 1738-1750.
- 1409 Huang, B., Wei, W., Wang, G., Gaertig, M.A., Feng, Y., Wang, W., Li, X.J., and Li, S. (2015). Mutant  
1410 huntingtin downregulates myelin regulatory factor-mediated myelin gene expression and affects mature  
1411 oligodendrocytes. *Neuron* 85, 1212-1226.
- 1412 Iacopetti, P., Michelini, M., Stuckmann, I., Oback, B., Aaku-Saraste, E., and Huttner, W.B. (1999).  
1413 Expression of the antiproliferative gene TIS21 at the onset of neurogenesis identifies single  
1414 neuroepithelial cells that switch from proliferative to neuron-generating division. *Proc Natl Acad Sci U S*  
1415 *A* 96, 4639-4644.
- 1416 Ishii, K., Kohno, T., and Hattori, M. (2019). Differential binding of anti-Reelin monoclonal antibodies  
1417 reveals the characteristics of Reelin protein under various conditions. *Biochem Biophys Res Commun*  
1418 514, 815-820.
- 1419 Kanatani, S., Honda, T., Aramaki, M., Hayashi, K., Kubo, K., Ishida, M., Tanaka, D.H., Kawauchi, T.,  
1420 Sekine, K., Kusuzawa, S., *et al.* (2015). The COUP-TFII/Neuropilin-2 is a molecular switch steering  
1421 diencephalon-derived GABAergic neurons in the developing mouse brain. *Proc Natl Acad Sci U S A* 112,  
1422 E4985-4994.
- 1423 Kanatani, S., Yozu, M., Tabata, H., and Nakajima, K. (2008). COUP-TFII Is Preferentially Expressed in  
1424 the Caudal Ganglionic Eminence and Is Involved in the Caudal Migratory Stream. *The Journal of*  
1425 *Neuroscience* 28, 13582.
- 1426 Katayama, K., Imai, F., Campbell, K., Lang, R.A., Zheng, Y., and Yoshida, Y. (2013). RhoA and Cdc42  
1427 are required in pre-migratory progenitors of the medial ganglionic eminence ventricular zone for proper  
1428 cortical interneuron migration. *Development* 140, 3139-3145.
- 1429 Kelenis, D.P., Hart, E., Edwards-Fligner, M., Johnson, J.E., and Vue, T.Y. (2018). ASCL1 regulates  
1430 proliferation of NG2-glia in the embryonic and adult spinal cord. *Glia* 66, 1862-1880.
- 1431 Kim, J.-Y., Jeong, H.S., Chung, T., Kim, M., Lee, J.H., Jung, W.H., and Koo, J.S. (2017). The value of  
1432 phosphohistone H3 as a proliferation marker for evaluating invasive breast cancers: A comparative study  
1433 with Ki67. *Oncotarget* 8, 65064-65076.
- 1434 Kostovic, I., and Rakic, P. (1990). Developmental history of the transient subplate zone in the visual and  
1435 somatosensory cortex of the macaque monkey and human brain. *J Comp Neurol* 297, 441-470.
- 1436 Kowalczyk, T., Pontious, A., Englund, C., Daza, R.A., Bedogni, F., Hodge, R., Attardo, A., Bell, C.,  
1437 Huttner, W.B., and Hevner, R.F. (2009). Intermediate neuronal progenitors (basal progenitors) produce  
1438 pyramidal-projection neurons for all layers of cerebral cortex. *Cereb Cortex* 19, 2439-2450.

- 1439 Kudo, C., Ajioka, I., Hirata, Y., and Nakajima, K. (2005). Expression profiles of EphA3 at both the RNA  
1440 and protein level in the developing mammalian forebrain. *J Comp Neurol* 487, 255-269.
- 1441 Labun, K., Montague, T.G., Krause, M., Torres Cleuren, Y.N., Tjeldnes, H., and Valen, E. (2019).  
1442 CHOPCHOP v3: expanding the CRISPR web toolbox beyond genome editing. *Nucleic Acids Res* 47,  
1443 W171-W174.
- 1444 Lidov, H.G.W., and Molliver, M.E. (1982). An immunohistochemical study of serotonin neuron  
1445 development in the rat: Ascending pathways and terminal fields. *Brain Res Bull* 8, 389-430.
- 1446 Lin, Y.S., Kuo, K.T., Chen, S.K., and Huang, H.S. (2018). RBFOX3/NeuN is dispensable for visual  
1447 function. *PLoS One* 13, e0192355.
- 1448 Lind, D., Franken, S., Kappler, J., Jankowski, J., and Schilling, K. (2005). Characterization of the  
1449 neuronal marker NeuN as a multiply phosphorylated antigen with discrete subcellular localization. *J*  
1450 *Neurosci Res* 79, 295-302.
- 1451 Lopez-Bendito, G., and Molnar, Z. (2003). Thalamocortical development: how are we going to get there?  
1452 *Nat Rev Neurosci* 4, 276-289.
- 1453 Lundgaard, I., Li, B., Xie, L., Kang, H., Sanggaard, S., Haswell, J.D., Sun, W., Goldman, S., Blekot, S.,  
1454 Nielsen, M., *et al.* (2015). Direct neuronal glucose uptake heralds activity-dependent increases in cerebral  
1455 metabolism. *Nat Commun* 6, 6807.
- 1456 Luskin, M.B., and Shatz, C.J. (1985). Studies of the earliest generated cells of the cat's visual cortex:  
1457 cogeneration of subplate and marginal zones. *J Neurosci* 5, 1062-1075.
- 1458 Marin, O., and Rubenstein, J.L. (2001). A long, remarkable journey: tangential migration in the  
1459 telencephalon. *Nat Rev Neurosci* 2, 780-790.
- 1460 Marin-Padilla, M. (1971). Early prenatal ontogenesis of the cerebral cortex (neocortex) of the cat (*Felis*  
1461 *domestica*). A Golgi study. *Z Anat Entwicklungsgesch* 134, 117-145.
- 1462 Marusich, M.F., Furneaux, H.M., Henion, P.D., and Weston, J.A. (1994). Hu neuronal proteins are  
1463 expressed in proliferating neurogenic cells. *J Neurobiol* 25, 143-155.
- 1464 Mayer, C., Hafemeister, C., Bandler, R.C., Machold, R., Batista Brito, R., Jaglin, X., Allaway, K., Butler,  
1465 A., Fishell, G., and Satija, R. (2018). Developmental diversification of cortical inhibitory interneurons.  
1466 *Nature* 555, 457-462.
- 1467 Mission, J.-P., Austin, C.P., Takahashi, T., Cepko, C.L., and Caviness, V.S., Jr. (1991). The Alignment of  
1468 Migrating Neural Cells in Relation to the Murine Neopallial Radial Glial Fiber System. *Cereb Cortex* 1,  
1469 221-229.
- 1470 Miyashita-Lin, E.M., Hevner, R., Wassarman, K.M., Martinez, S., and Rubenstein, J.L. (1999). Early  
1471 neocortical regionalization in the absence of thalamic innervation. *Science* 285, 906-909.

- 1472 Miyata, T., Kawaguchi, A., Saito, K., Kawano, M., Muto, T., and Ogawa, M. (2004). Asymmetric  
1473 production of surface-dividing and non-surface-dividing cortical progenitor cells. *Development* 131,  
1474 3133-3145.
- 1475 Molnár, Z., Adams, R., Goffinet, A., and Blakemore, C. (1998). The Role of the First Postmitotic Cortical  
1476 Cells in the Development of Thalamocortical Innervation in the Reeler Mouse. *J Neurosci* 18.
- 1477 Moreno-Juan, V., Filipchuk, A., Antón-Bolaños, N., Mezzera, C., Gezelius, H., Andrés, B.,  
1478 Rodríguez-Malmierca, L., Susín, R., Schaad, O., Iwasato, T., *et al.* (2017). Prenatal thalamic waves  
1479 regulate cortical area size prior to sensory processing. *Nature Communications* 8, 14172.
- 1480 Murthy, S., Niquille, M., Hurni, N., Limoni, G., Frazer, S., Chameau, P., van Hooft, J.A., Vitalis, T., and  
1481 Dayer, A. (2014). Serotonin receptor 3A controls interneuron migration into the neocortex. *Nat Commun*  
1482 5, 5524.
- 1483 Nadarajah, B., Alifragis, P., Wong, R.O., and Parnavelas, J.G. (2002). Ventricle-directed migration in the  
1484 developing cerebral cortex. *Nat Neurosci* 5, 218-224.
- 1485 Nadarajah, B., Brunstrom, J.E., Grutzendler, J., Wong, R.O., and Pearlman, A.L. (2001). Two modes of  
1486 radial migration in early development of the cerebral cortex. *Nat Neurosci* 4, 143-150.
- 1487 Nakajima, K., Mikoshiba, K., Miyata, T., Kudo, C., and Ogawa, M. (1997). Disruption of hippocampal  
1488 development & in vivo by CR-50 mAb against Reelin. *Proceedings of the National*  
1489 *Academy of Sciences* 94, 8196.
- 1490 Nakashiba, T., Nishimura, S., Ikeda, T., and Itoharu, S. (2002). Complementary expression and neurite  
1491 outgrowth activity of netrin-G subfamily members. *Mech Dev* 111, 47-60.
- 1492 Nichols, A.J., and Olson, E.C. (2010). Reelin Promotes Neuronal Orientation and Dendritogenesis during  
1493 Preplate Splitting. *Cerebral Cortex (New York, NY)* 20, 2213-2223.
- 1494 Nishiyama, J., Hayashi, Y., Nomura, T., Miura, E., Kakegawa, W., and Yuzaki, M. (2012). Selective and  
1495 regulated gene expression in murine Purkinje cells by in utero electroporation. *Eur J Neurosci* 36,  
1496 2867-2876.
- 1497 Noctor, S.C., Martinez-Cerdeno, V., Ivic, L., and Kriegstein, A.R. (2004). Cortical neurons arise in  
1498 symmetric and asymmetric division zones and migrate through specific phases. *Nat Neurosci* 7, 136-144.
- 1499 Nowakowski, T.J., Pollen, A.A., Sandoval-Espinosa, C., and Kriegstein, A.R. (2016). Transformation of  
1500 the Radial Glia Scaffold Demarcates Two Stages of Human Cerebral Cortex Development. *Neuron* 91,  
1501 1219-1227.
- 1502 Oberst, P., Fievre, S., Baumann, N., Concetti, C., Bartolini, G., and Jabaudon, D. (2019). Temporal  
1503 plasticity of apical progenitors in the developing mouse neocortex. *Nature* 573, 370-374.

1504 Ogawa, M., Miyata, T., Nakajima, K., Yagyu, K., Seike, M., Ikenaka, K., Yamamoto, H., and  
1505 Mikoshiba, K. (1995). The reeler gene-associated antigen on cajal-retzius neurons is a crucial molecule  
1506 for laminar organization of cortical neurons. *Neuron* 14, 899-912.

1507 Ohtaka-Maruyama, C., Hirai, S., Miwa, A., Heng, J.I., Shitara, H., Ishii, R., Taya, C., Kawano, H., Kasai,  
1508 M., Nakajima, K., and Okado, H. (2013). RP58 regulates the multipolar-bipolar transition of newborn  
1509 neurons in the developing cerebral cortex. *Cell Rep* 3, 458-471.

1510 Ohtaka-Maruyama, C., Okamoto, M., Endo, K., Oshima, M., Kaneko, N., Yura, K., Okado, H., Miyata,  
1511 T., and Maeda, N. (2018). Synaptic transmission from subplate neurons controls radial migration of  
1512 neocortical neurons. *Science* 360, 313.

1513 Ohtsuka, M., Sato, M., Miura, H., Takabayashi, S., Matsuyama, M., Koyano, T., Arifin, N., Nakamura, S.,  
1514 Wada, K., and Gurumurthy, C.B. (2018). i-GONAD: a robust method for in situ germline genome  
1515 engineering using CRISPR nucleases. *Genome Biol* 19, 25.

1516 Oishi, K., Aramaki, M., and Nakajima, K. (2016a). Mutually repressive interaction between *Brn1/2* and  
1517 *Rorb* contributes to the establishment of neocortical layer 2/3 and layer 4. *Proc Natl Acad Sci U S A* 113,  
1518 3371-3376.

1519 Oishi, K., Nakagawa, N., Tachikawa, K., Sasaki, S., Aramaki, M., Hirano, S., Yamamoto, N., Yoshimura,  
1520 Y., and Nakajima, K. (2016b). Identity of neocortical layer 4 neurons is specified through correct  
1521 positioning into the cortex. *eLife* 5, e10907.

1522 Olson, E.C. (2014). Analysis of preplate splitting and early cortical development illuminates the biology  
1523 of neurological disease. *Front Pediatr* 2, 121.

1524 Osheroff, H., and Hatten, M.E. (2009). Gene expression profiling of preplate neurons destined for the  
1525 subplate: genes involved in transcription, axon extension, neurotransmitter regulation, steroid hormone  
1526 signaling, and neuronal survival. *Cereb Cortex* 19 Suppl 1, i126-134.

1527 Ozair, M.Z., Kirst, C., van den Berg, B.L., Ruzo, A., Rito, T., and Brivanlou, A.H. (2018). hPSC  
1528 Modeling Reveals that Fate Selection of Cortical Deep Projection Neurons Occurs in the Subplate. *Cell*  
1529 *Stem Cell* 23, 60-73 e66.

1530 Pedraza, M., Hoerder-Suabedissen, A., Albert-Maestro, M.A., Molnar, Z., and De Carlos, J.A. (2014).  
1531 Extracortical origin of some murine subplate cell populations. *Proc Natl Acad Sci U S A* 111, 8613-8618.

1532 Pilaz, L.J., Patti, D., Marcy, G., Ollier, E., Pfister, S., Douglas, R.J., Betizeau, M., Gautier, E., Cortay, V.,  
1533 Doerflinger, N., *et al.* (2009). Forced G1-phase reduction alters mode of division, neuron number, and  
1534 laminar phenotype in the cerebral cortex. *Proc Natl Acad Sci U S A* 106, 21924-21929.

- 1535 Pinheiro, E.M., Xie, Z., Norovich, A.L., Vidaki, M., Tsai, L.H., and Gertler, F.B. (2011). Lpd depletion  
1536 reveals that SRF specifies radial versus tangential migration of pyramidal neurons. *Nat Cell Biol* 13,  
1537 989-995.
- 1538 Polleux, F., Dehay, C., Moraillon, B., and Kennedy, H. (1997). Regulation of Neuroblast Cell-Cycle  
1539 Kinetics Plays a Crucial Role in the Generation of Unique Features of Neocortical Areas. *The Journal of*  
1540 *Neuroscience* 17, 7763.
- 1541 Price, D.J., Aslam, S., Tasker, L., and Gillies, K. (1997). Fates of the earliest generated cells in the  
1542 developing murine neocortex. *J Comp Neurol* 377, 414-422.
- 1543 Ragan, T., Kadiri, L.R., Venkataraju, K.U., Bahlmann, K., Sutin, J., Taranda, J., Arganda-Carreras, I.,  
1544 Kim, Y., Seung, H.S., and Osten, P. (2012). Serial two-photon tomography for automated ex vivo mouse  
1545 brain imaging. *Nature Methods* 9, 255-258.
- 1546 Rakic, P. (1988). Specification of cerebral cortical areas. *Science* 241, 170-176.
- 1547 Rakic, P. (1995). A small step for the cell, a giant leap for mankind: a hypothesis of neocortical expansion  
1548 during evolution. *Trends Neurosci* 18, 383-388.
- 1549 Reim, K., Regus-Leidig, H., Ammermüller, J., El-Kordi, A., Radyushkin, K., Ehrenreich, H., Brandstätter,  
1550 J.H., and Brose, N. (2009). Aberrant function and structure of retinal ribbon synapses in the absence of  
1551 complexin 3 and complexin 4. *J Cell Sci* 122, 1352.
- 1552 Remedios, R., Huilgol, D., Saha, B., Hari, P., Bhatnagar, L., Kowalczyk, T., Hevner, R.F., Suda, Y.,  
1553 Aizawa, S., Ohshima, T., *et al.* (2007). A stream of cells migrating from the caudal telencephalon reveals  
1554 a link between the amygdala and neocortex. *Nat Neurosci* 10, 1141-1150.
- 1555 Saito, K., Okamoto, M., Watanabe, Y., Noguchi, N., Nagasaka, A., Nishina, Y., Shinoda, T., Sakakibara,  
1556 A., and Miyata, T. (2019). Dorsal-to-Ventral Cortical Expansion Is Physically Primed by Ventral  
1557 Streaming of Early Embryonic Preplate Neurons. *Cell Rep* 29, 1555-1567 e1555.
- 1558 Saliu, A., Adise, S., Xian, S., Kudelska, K., and Rodríguez-Contreras, A. (2014). Natural and  
1559 lesion-induced decrease in cell proliferation in the medial nucleus of the trapezoid body during hearing  
1560 development. *J Comp Neurol* 522, 971-985.
- 1561 Sauer, F.C. (1935). Mitosis in the neural tube. *J Comp Neurol* 62, 377-405.
- 1562 Schindelin, J., Arganda-Carreras, I., Frise, E., Kaynig, V., Longair, M., Pietzsch, T., Preibisch, S.,  
1563 Rueden, C., Saalfeld, S., Schmid, B., *et al.* (2012). Fiji: an open-source platform for biological-image  
1564 analysis. *Nat Methods* 9, 676-682.
- 1565 Schneider, S., Gulacsi, A., and Hatten, M.E. (2011). Lrp12/Mig13a Reveals Changing Patterns of  
1566 Preplate Neuronal Polarity during Corticogenesis that Are Absent in Reeler Mutant Mice. *Cerebral*  
1567 *Cortex* (New York, NY) 21, 134-144.

1568 Seiriki, K., Kasai, A., Hashimoto, T., Schulze, W., Niu, M., Yamaguchi, S., Nakazawa, T., Inoue, K.I.,  
1569 Uezono, S., Takada, M., *et al.* (2017). High-Speed and Scalable Whole-Brain Imaging in Rodents and  
1570 Primates. *Neuron* 94, 1085-1100 e1086.

1571 Seiriki, K., Kasai, A., Nakazawa, T., Niu, M., Naka, Y., Tanuma, M., Igarashi, H., Yamaura, K.,  
1572 Hayata-Takano, A., Ago, Y., and Hashimoto, H. (2019). Whole-brain block-face serial microscopy  
1573 tomography at subcellular resolution using FAST. *Nat Protoc* 14, 1509-1529.

1574 Sekine, K., Honda, T., Kawauchi, T., Kubo, K., and Nakajima, K. (2011). The outermost region of the  
1575 developing cortical plate is crucial for both the switch of the radial migration mode and the  
1576 Dab1-dependent "inside-out" lamination in the neocortex. *J Neurosci* 31, 9426-9439.

1577 Sekine, K., Kawauchi, T., Kubo, K., Honda, T., Herz, J., Hattori, M., Kinashi, T., and Nakajima, K.  
1578 (2012). Reelin controls neuronal positioning by promoting cell-matrix adhesion via inside-out activation  
1579 of integrin alpha5beta1. *Neuron* 76, 353-369.

1580 Shimogori, T., and Ogawa, M. (2008). Gene application with in utero electroporation in mouse  
1581 embryonic brain. *Dev Growth Differ* 50, 499-506.

1582 Shin, M., Kitazawa, A., Yoshinaga, S., Hayashi, K., Hirata, Y., Dehay, C., Kubo, K.I., and Nakajima, K.  
1583 (2019). Both excitatory and inhibitory neurons transiently form clusters at the outermost region of the  
1584 developing mammalian cerebral neocortex. *J Comp Neurol* 527, 1577-1597.

1585 Shitamukai, A., Konno, D., and Matsuzaki, F. (2011). Oblique radial glial divisions in the developing  
1586 mouse neocortex induce self-renewing progenitors outside the germinal zone that resemble primate outer  
1587 subventricular zone progenitors. *J Neurosci* 31, 3683-3695.

1588 Smart, I.H. (1976). A pilot study of cell production by the ganglionic eminences of the developing mouse  
1589 brain. *J Anat* 121, 71-84.

1590 Smart, I.H., and McSherry, G.M. (1982). Growth patterns in the lateral wall of the mouse telencephalon.  
1591 II. Histological changes during and subsequent to the period of isocortical neuron production. *J Anat* 134,  
1592 415-442.

1593 Smart, I.H., and Smart, M. (1982). Growth patterns in the lateral wall of the mouse telencephalon: I.  
1594 Autoradiographic studies of the histogenesis of the isocortex and adjacent areas. *J Anat* 134, 273-298.

1595 Stolt, C.C., Rehberg, S., Ader, M., Lommes, P., Riethmacher, D., Schachner, M., Bartsch, U., and  
1596 Wegner, M. (2002). Terminal differentiation of myelin-forming oligodendrocytes depends on the  
1597 transcription factor Sox10. *Genes Dev* 16, 165-170.

1598 Suarez-Mier, G.B., and Buckwalter, M.S. (2015). Glial Fibrillary Acidic Protein-Expressing Glia in the  
1599 Mouse Lung. *ASN Neuro* 7.

- 1600 Subramanian, L., Bershteyn, M., Paredes, M.F., and Kriegstein, A.R. (2017). Dynamic behaviour of  
1601 human neuroepithelial cells in the developing forebrain. *Nat Commun* 8, 14167.
- 1602 Suh, J.M., Yu, C.-T., Tang, K., Tanaka, T., Kodama, T., Tsai, M.-J., and Tsai, S.Y. (2006). The  
1603 Expression Profiles of Nuclear Receptors in the Developing and Adult Kidney. *Mol Endocrinol* 20,  
1604 3412-3420.
- 1605 Swanson, D.J., and Goldowitz, D. (2011). Experimental Sey mouse chimeras reveal the developmental  
1606 deficiencies of Pax6-null granule cells in the postnatal cerebellum. *Dev Biol* 351, 1-12.
- 1607 Tabata, H., Kanatani, S., and Nakajima, K. (2009). Differences of migratory behavior between direct  
1608 progeny of apical progenitors and basal progenitors in the developing cerebral cortex. *Cereb Cortex* 19,  
1609 2092-2105.
- 1610 Tabata, H., and Nakajima, K. (2001). Efficient in utero gene transfer system to the developing mouse  
1611 brain using electroporation: visualization of neuronal migration in the developing cortex. *Neuroscience*  
1612 103, 865-872.
- 1613 Tabata, H., and Nakajima, K. (2003). Multipolar migration: the third mode of radial neuronal migration in  
1614 the developing cerebral cortex. *J Neurosci* 23, 9996-10001.
- 1615 Tabata, H., and Nakajima, K. (2008). Labeling embryonic mouse central nervous system cells by in utero  
1616 electroporation. *Development, Growth & Differentiation* 50, 507-511.
- 1617 Tabata, H., Yoshinaga, S., and Nakajima, K. (2012). Cytoarchitecture of mouse and human subventricular  
1618 zone in developing cerebral neocortex. *Exp Brain Res* 216, 161-168.
- 1619 Takabayashi, S., Aoshima, T., Kabashima, K., Aoto, K., Ohtsuka, M., and Sato, M. (2018). i-GONAD  
1620 (improved genome-editing via oviductal nucleic acids delivery), a convenient in vivo tool to produce  
1621 genome-edited rats. *Sci Rep* 8, 12059.
- 1622 Takahashi, T., Goto, T., Miyama, S., Nowakowski, R.S., and Caviness, V.S. (1999). Sequence of Neuron  
1623 Origin and Neocortical Laminar Fate: Relation to Cell Cycle of Origin in the Developing Murine  
1624 Cerebral Wall. *The Journal of Neuroscience* 19, 10357.
- 1625 Takahashi, T., Misson, J.-P., and Caviness Jr, V.S. (1990). Glial process elongation and branching in the  
1626 developing murine neocortex: A qualitative and quantitative immunohistochemical analysis. *J Comp*  
1627 *Neurol* 302, 15-28.
- 1628 Takahashi, T., Nowakowski, R.S., and Caviness, V.S., Jr. (1996). The leaving or Q fraction of the murine  
1629 cerebral proliferative epithelium: a general model of neocortical neuronogenesis. *J Neurosci* 16,  
1630 6183-6196.
- 1631 Takeo, Y.H. (2016). In utero Electroporation of Mouse Cerebellar Purkinje Cells. *Bio-protocol* 6, e1835.

- 1632 Takeo, Y.H., Kakegawa, W., Miura, E., and Yuzaki, M. (2015). ROR $\alpha$  Regulates Multiple Aspects of  
1633 Dendrite Development in Cerebellar Purkinje Cells &em&gt;In Vivo&em&gt;. The Journal of  
1634 Neuroscience 35, 12518.
- 1635 Tamamaki, N., Fujimori, K.E., and Takauji, R. (1997). Origin and Route of Tangentially Migrating  
1636 Neurons in the Developing Neocortical Intermediate Zone. The Journal of Neuroscience 17, 8313.
- 1637 Tamamaki, N., Yanagawa, Y., Tomioka, R., Miyazaki, J., Obata, K., and Kaneko, T. (2003). Green  
1638 fluorescent protein expression and colocalization with calretinin, parvalbumin, and somatostatin in the  
1639 GAD67-GFP knock-in mouse. J Comp Neurol 467, 60-79.
- 1640 Tan, X., Liu, W.A., Zhang, X.J., Shi, W., Ren, S.Q., Li, Z., Brown, K.N., and Shi, S.H. (2016). Vascular  
1641 Influence on Ventral Telencephalic Progenitors and Neocortical Interneuron Production. Dev Cell 36,  
1642 624-638.
- 1643 Tan, X., and Shi, S.-H. (2013). Neocortical neurogenesis and neuronal migration. Wiley Interdisciplinary  
1644 Reviews: Developmental Biology 2, 443-459.
- 1645 Tatsumi, K., Isonishi, A., Yamasaki, M., Kawabe, Y., Morita-Takemura, S., Nakahara, K., Terada, Y.,  
1646 Shinjo, T., Okuda, H., Tanaka, T., and Wanaka, A. (2018). Olig2-Lineage Astrocytes: A Distinct Subtype  
1647 of Astrocytes That Differs from GFAP Astrocytes. Front Neuroanat 12, 8-8.
- 1648 Telley, L., Agirman, G., Prados, J., Amberg, N., Fievre, S., Oberst, P., Bartolini, G., Vitali, I., Cadilhac,  
1649 C., Hippenmeyer, S., *et al.* (2019). Temporal patterning of apical progenitors and their daughter neurons  
1650 in the developing neocortex. Science 364.
- 1651 Telley, L., Govindan, S., Prados, J., Stevant, I., Nef, S., Dermitzakis, E., Dayer, A., and Jabaudon, D.  
1652 (2016). Sequential transcriptional waves direct the differentiation of newborn neurons in the mouse  
1653 neocortex. Science 351, 1443-1446.
- 1654 Vaid, S., Camp, J.G., Hersemann, L., Eugster Oegema, C., Heninger, A.-K., Winkler, S., Brandl, H.,  
1655 Sarov, M., Treutlein, B., Huttner, W.B., and Namba, T. (2018). A novel population of Hopx-dependent  
1656 basal radial glial cells in the developing mouse neocortex. Development 145, dev169276.
- 1657 Vasistha, N.A., Garcia-Moreno, F., Arora, S., Cheung, A.F., Arnold, S.J., Robertson, E.J., and Molnar, Z.  
1658 (2015). Cortical and Clonal Contribution of Tbr2 Expressing Progenitors in the Developing Mouse Brain.  
1659 Cereb Cortex 25, 3290-3302.
- 1660 Vue, T.Y., Lee, M., Tan, Y.E., Werkhoven, Z., Wang, L., and Nakagawa, Y. (2013). Thalamic control of  
1661 neocortical area formation in mice. The Journal of neuroscience : the official journal of the Society for  
1662 Neuroscience 33, 8442-8453.
- 1663 Wang, X., Tsai, J.W., LaMonica, B., and Kriegstein, A.R. (2011). A new subtype of progenitor cell in the  
1664 mouse embryonic neocortex. Nat Neurosci 14, 555-561.



1665 Wassarman, K., Lewandoski, M., Campbell, K., Joyner, A.L., L. R. Rubenstein, J., Martínez, S., and  
1666 Martin, G.R. (1997). Specification of the anterior hindbrain and establishment of a normal mid/hindbrain  
1667 organizer is dependent on Gbx2 gene function, Vol 124.

1668 Watanabe, Y., Kawaue, T., and Miyata, T. (2018). Differentiating cells mechanically limit the interkinetic  
1669 nuclear migration of progenitor cells to secure apical cytotgenesis. *Development* 145.

1670 Winkler, C.C., Yabut, O.R., Fregoso, S.P., Gomez, H.G., Dwyer, B.E., Pleasure, S.J., and Franco, S.J.  
1671 (2018). The Dorsal Wave of Neocortical Oligodendrogenesis Begins Embryonically and Requires  
1672 Multiple Sources of Sonic Hedgehog. *J Neurosci* 38, 5237-5250.

1673 Yamanaka, T., Tosaki, A., Miyazaki, H., Kurosawa, M., Furukawa, Y., Yamada, M., and Nukina, N.  
1674 (2010). Mutant huntingtin fragment selectively suppresses Brn-2 POU domain transcription factor to  
1675 mediate hypothalamic cell dysfunction. *Hum Mol Genet* 19, 2099-2112.

1676 Yi, J.-H., Katagiri, Y., Susarla, B., Figge, D., Symes, A.J., and Geller, H.M. (2012). Alterations in  
1677 sulfated chondroitin glycosaminoglycans following controlled cortical impact injury in mice. *The Journal*  
1678 *of comparative neurology* 520, 3295-3313.

1679 Yoshinaga, S., Ohkubo, T., Sasaki, S., Nuriya, M., Ogawa, Y., Yasui, M., Tabata, H., and Nakajima, K.  
1680 (2012). A Phosphatidylinositol Lipids System, Lamellipodin, and Ena/VASP Regulate Dynamic  
1681 Morphology of Multipolar Migrating Cells in the Developing Cerebral Cortex. *The Journal of*  
1682 *Neuroscience* 32, 11643.

1683 Zhang, L.J., Bhattacharya, S., Leid, M., Ganguli-Indra, G., and Indra, A.K. (2012). Ctip2 is a dynamic  
1684 regulator of epidermal proliferation and differentiation by integrating EGFR and Notch signaling. *J Cell*  
1685 *Sci* 125, 5733-5744.

1686 Zhao, T., Li, H., and Liu, Z. (2017). Tumor necrosis factor receptor 2 promotes growth of colorectal  
1687 cancer via the PI3K/AKT signaling pathway. *Oncol Lett* 13, 342-346.

1688 Zhou, Q., Wang, S., and Anderson, D.J. (2000). Identification of a Novel Family of Oligodendrocyte  
1689 Lineage-Specific Basic Helix-Loop-Helix Transcription Factors. *Neuron* 25, 331-343.

1690

1691

Figure 1

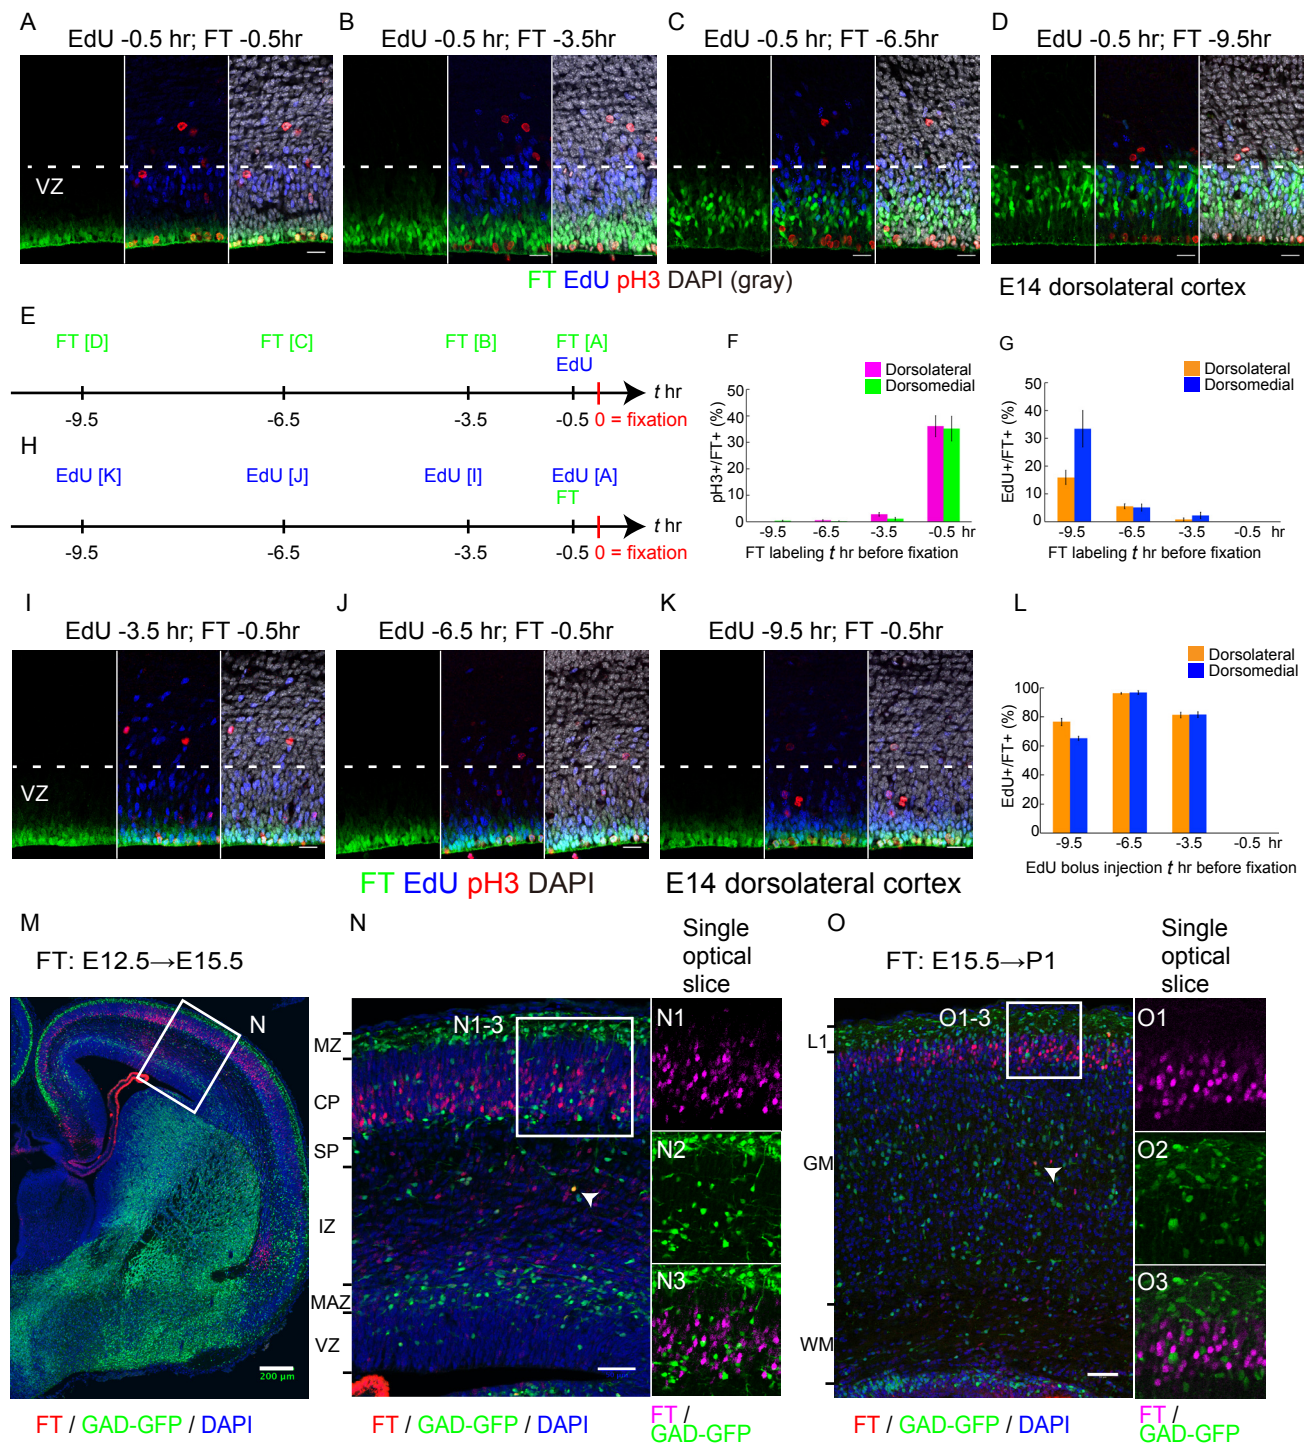

Figure 2

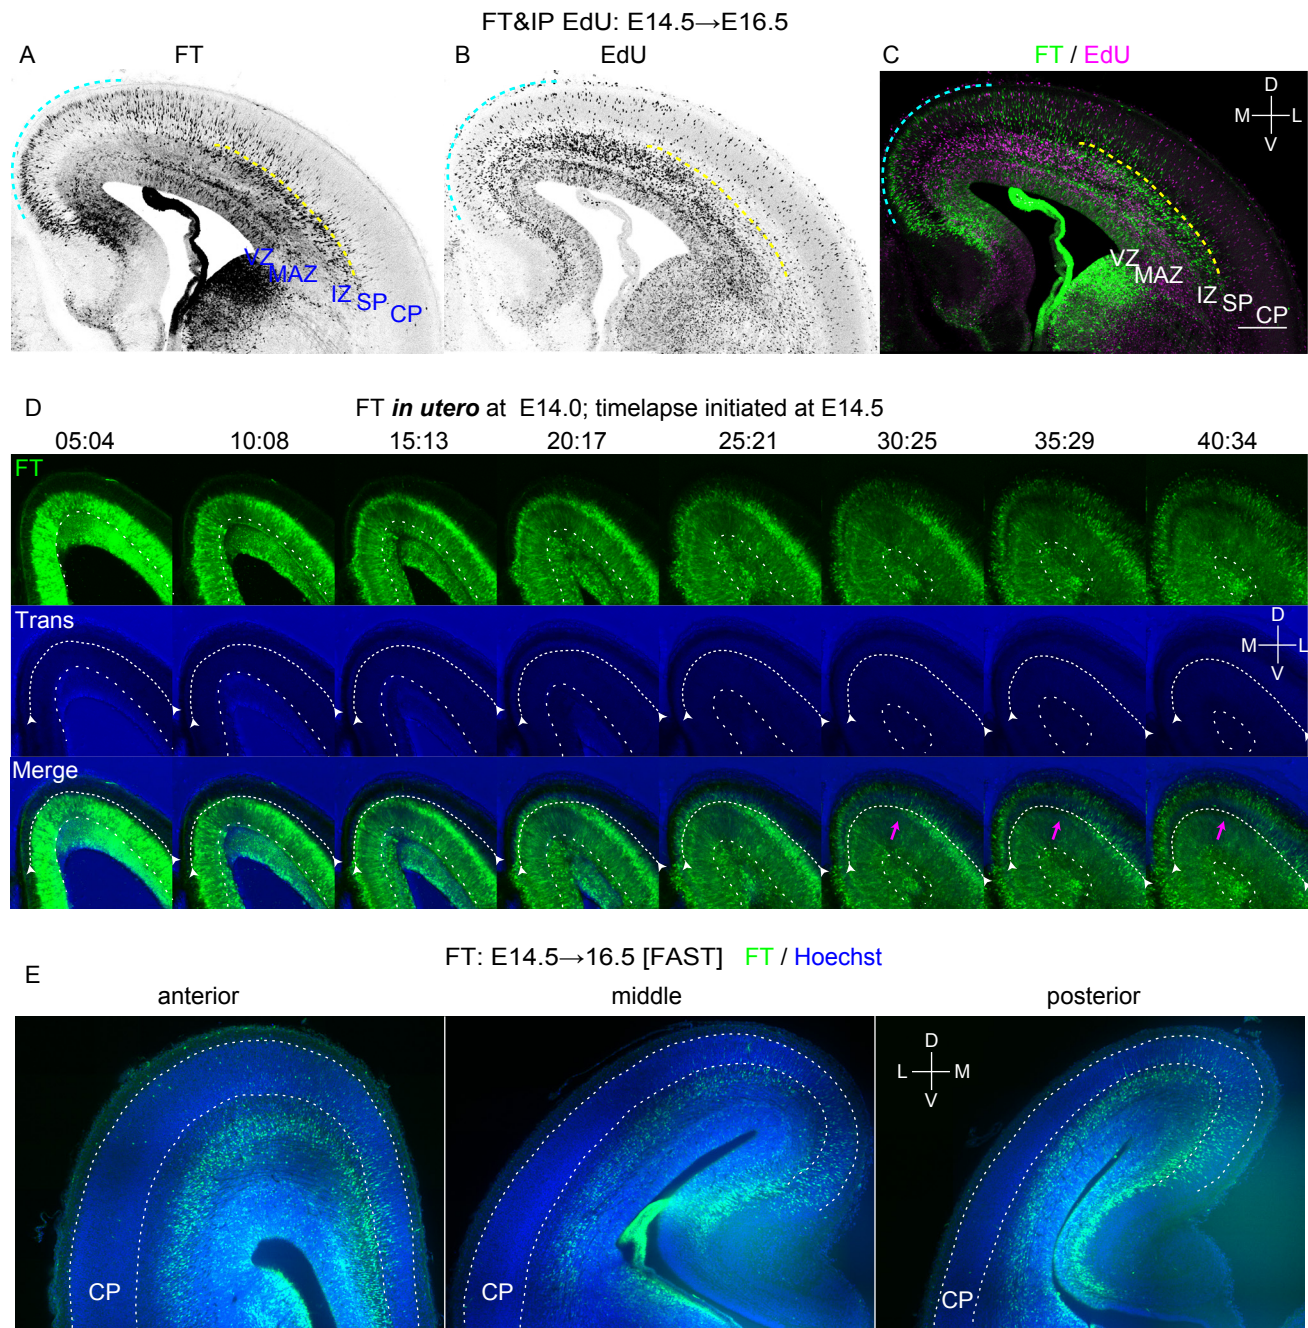

Figure 3

FT: E10.5

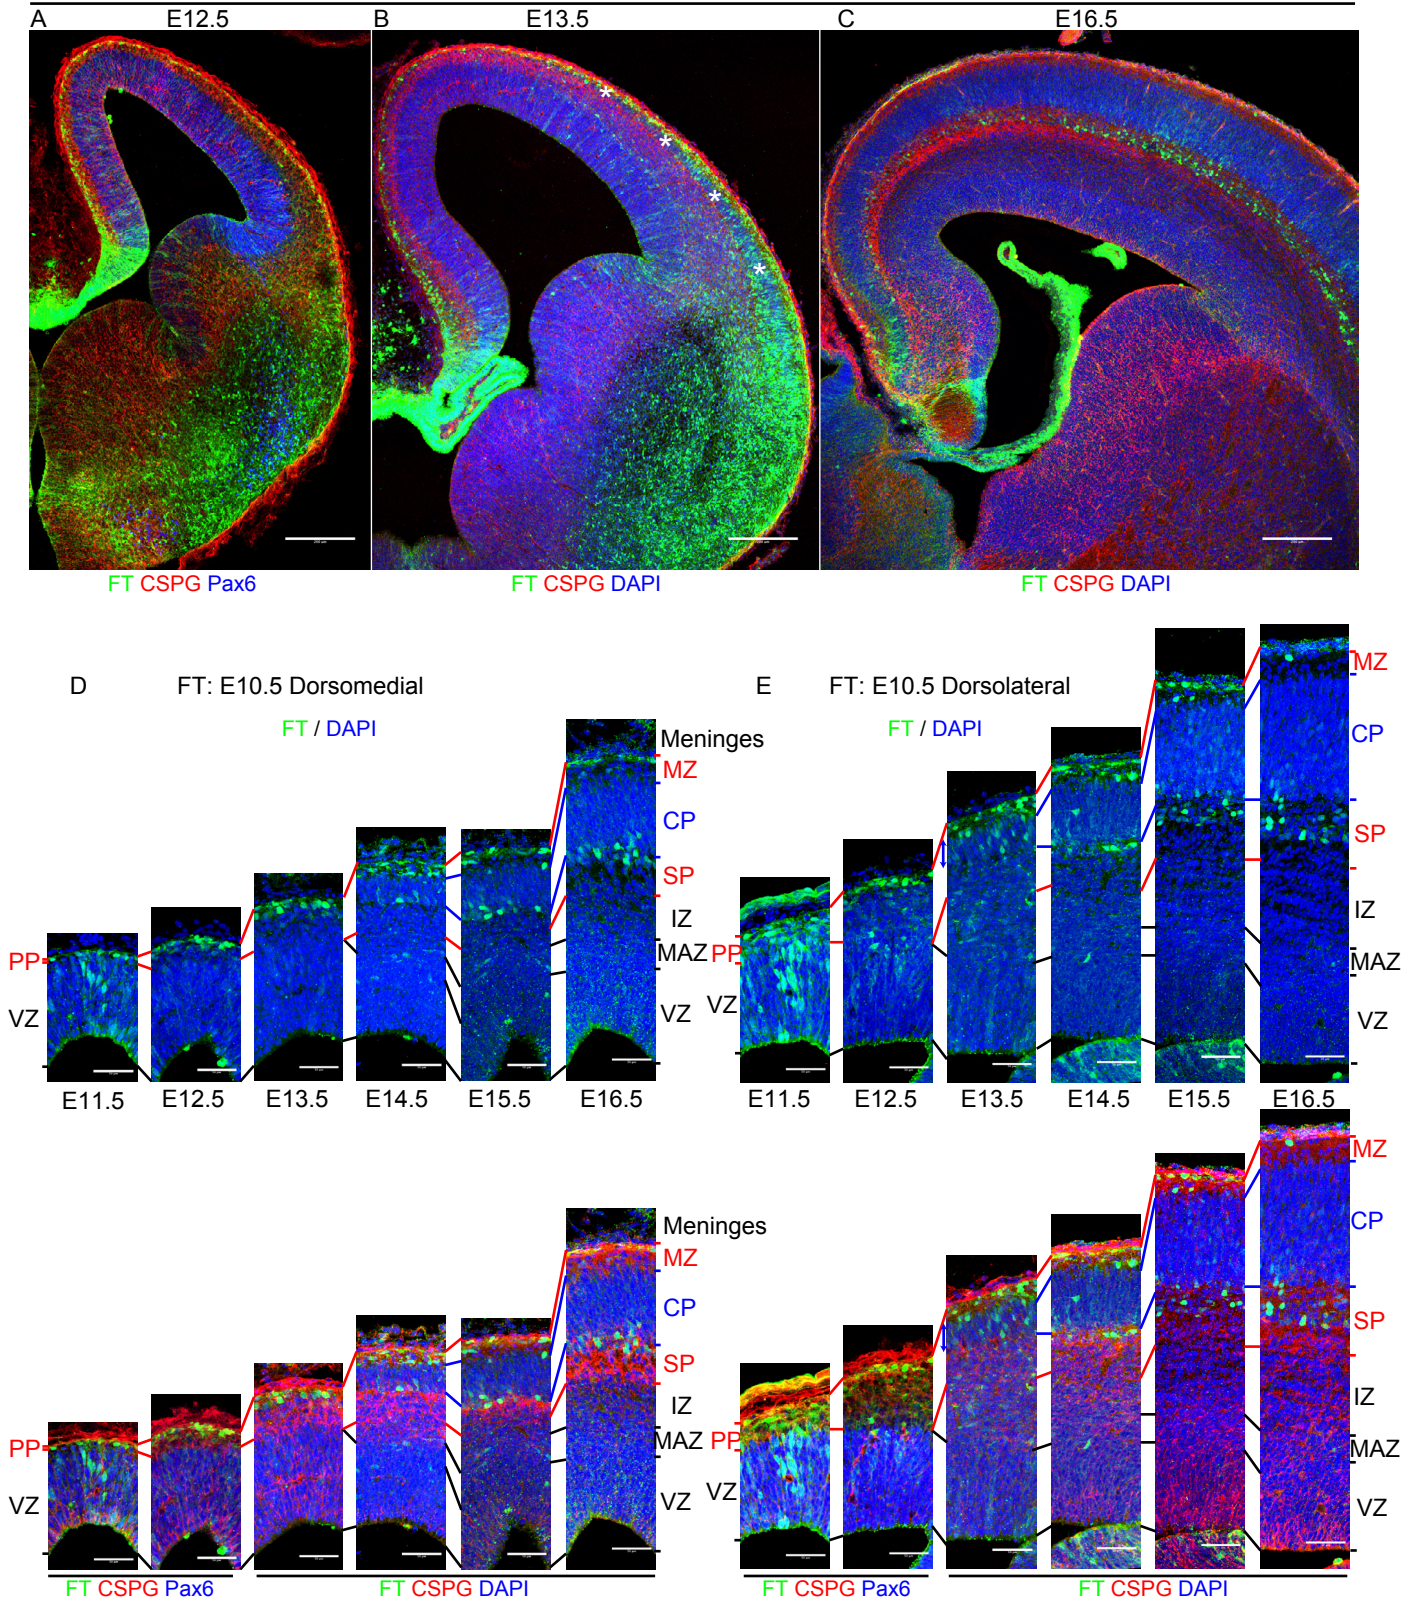

Figure 4

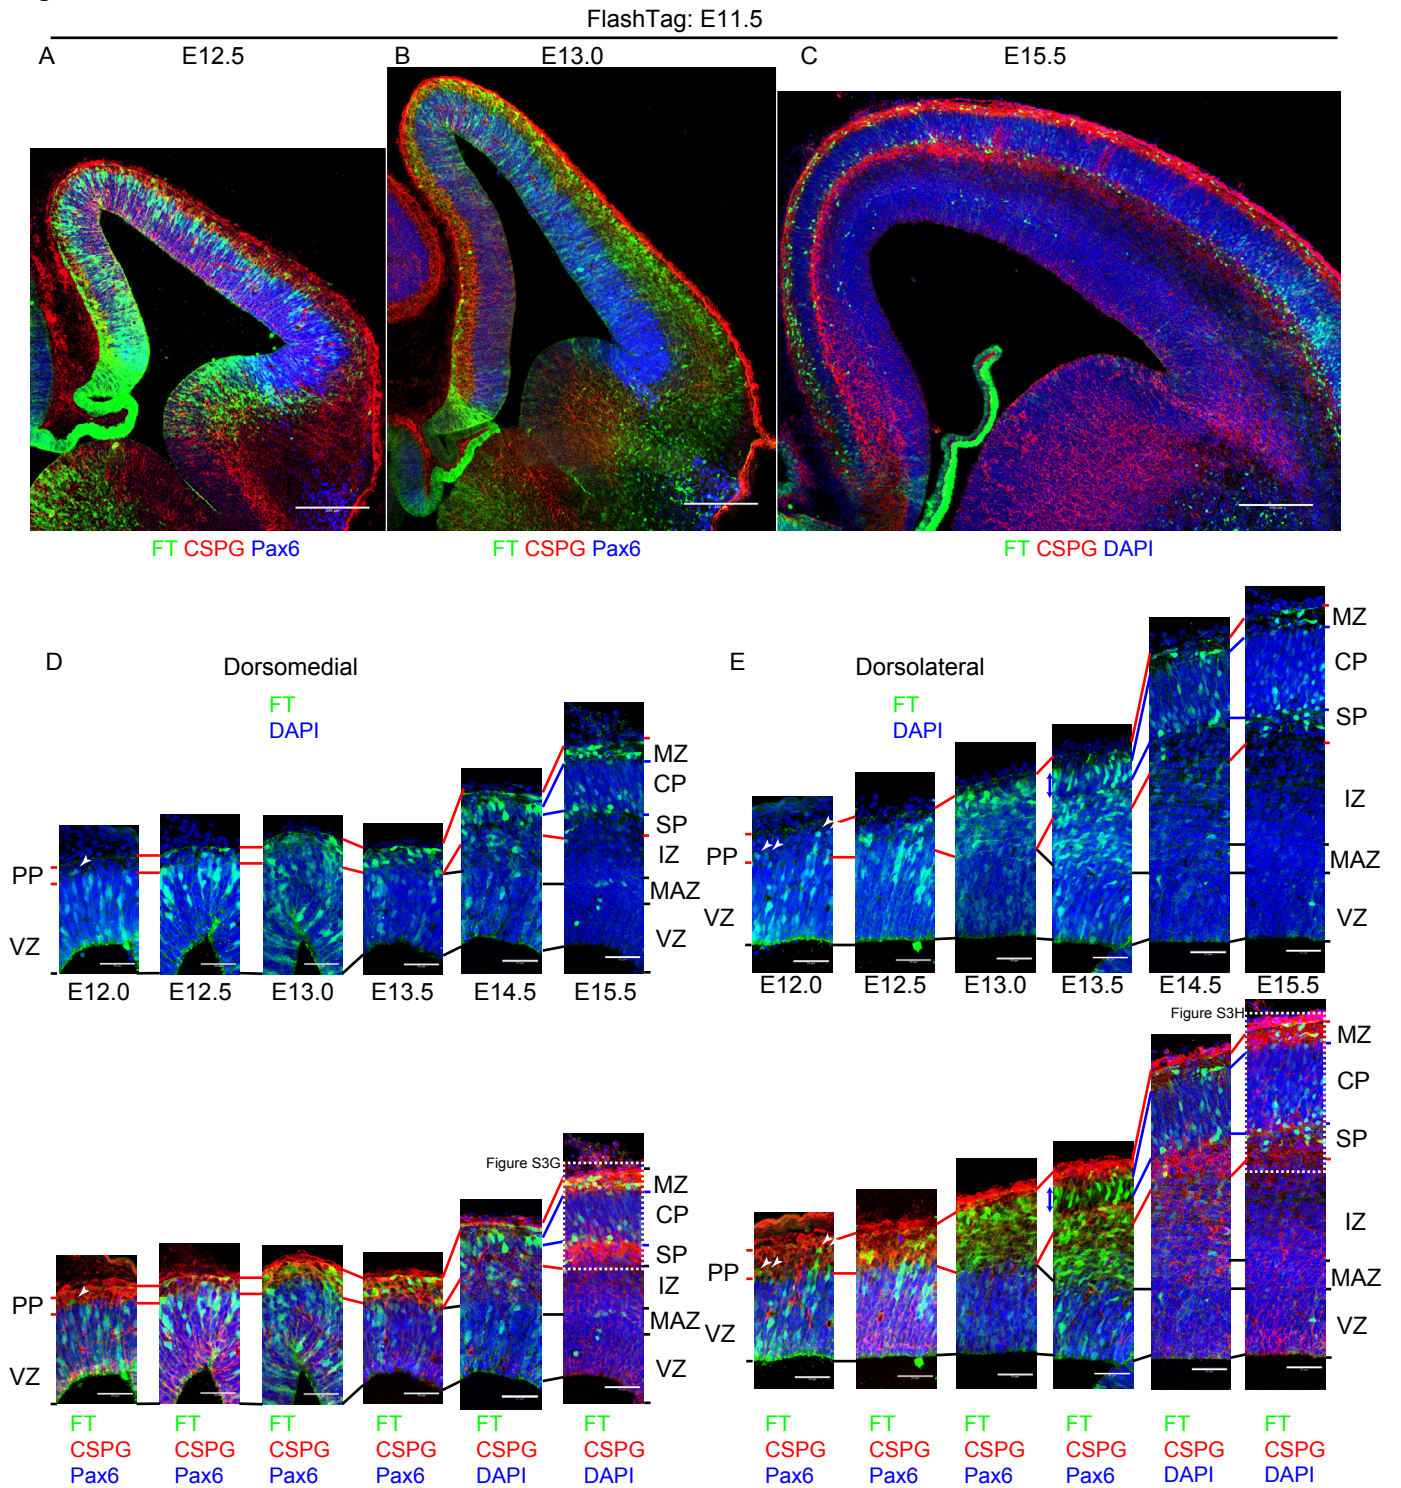

Figure 5

FlashTag: E12.5

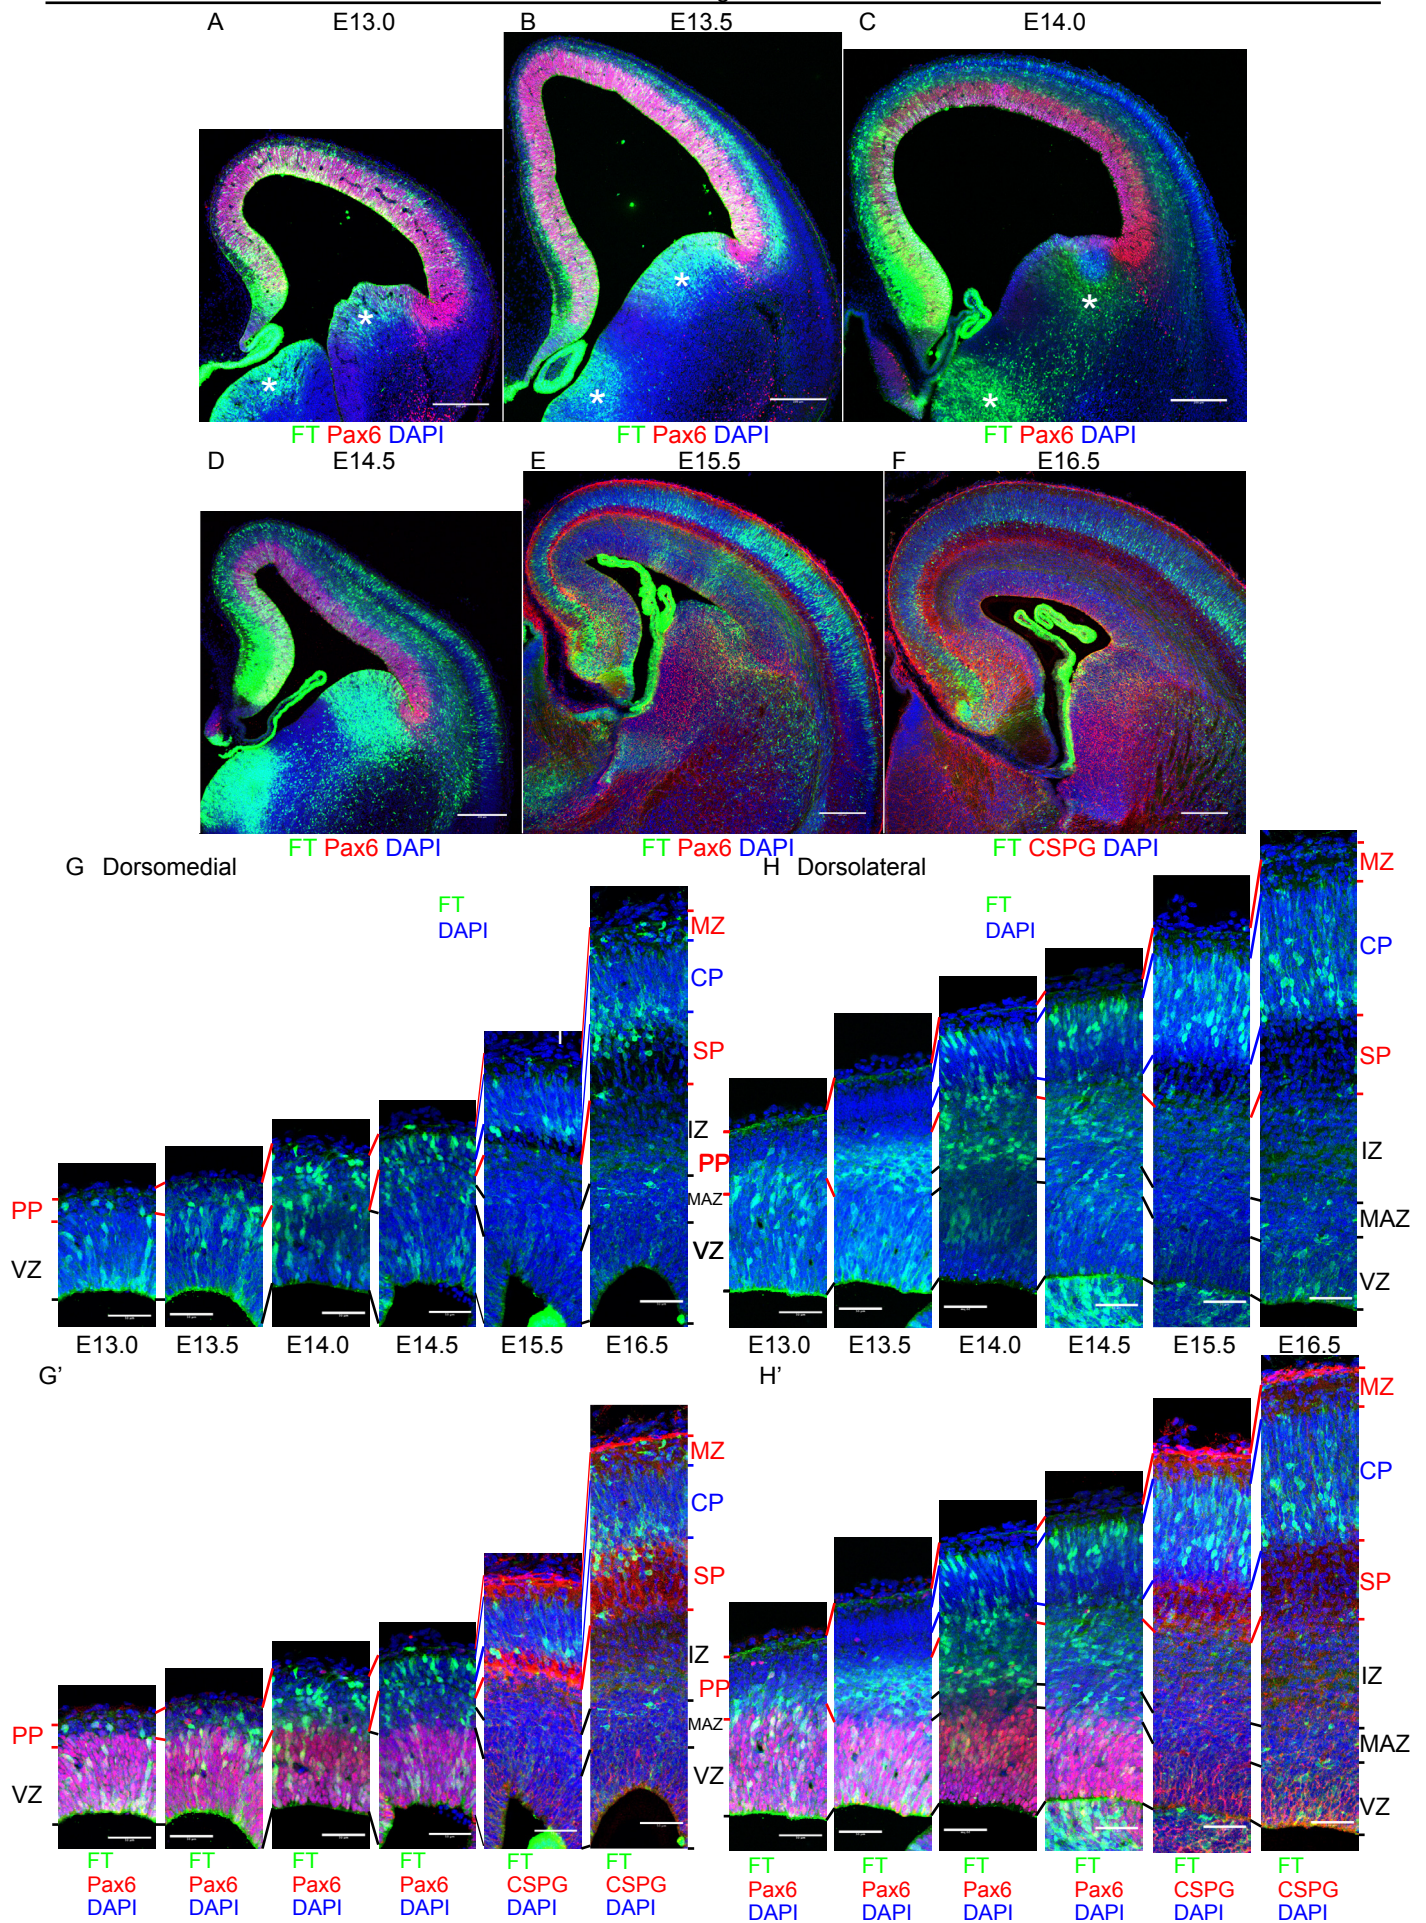

Figure 6

FlashTag: E13.5

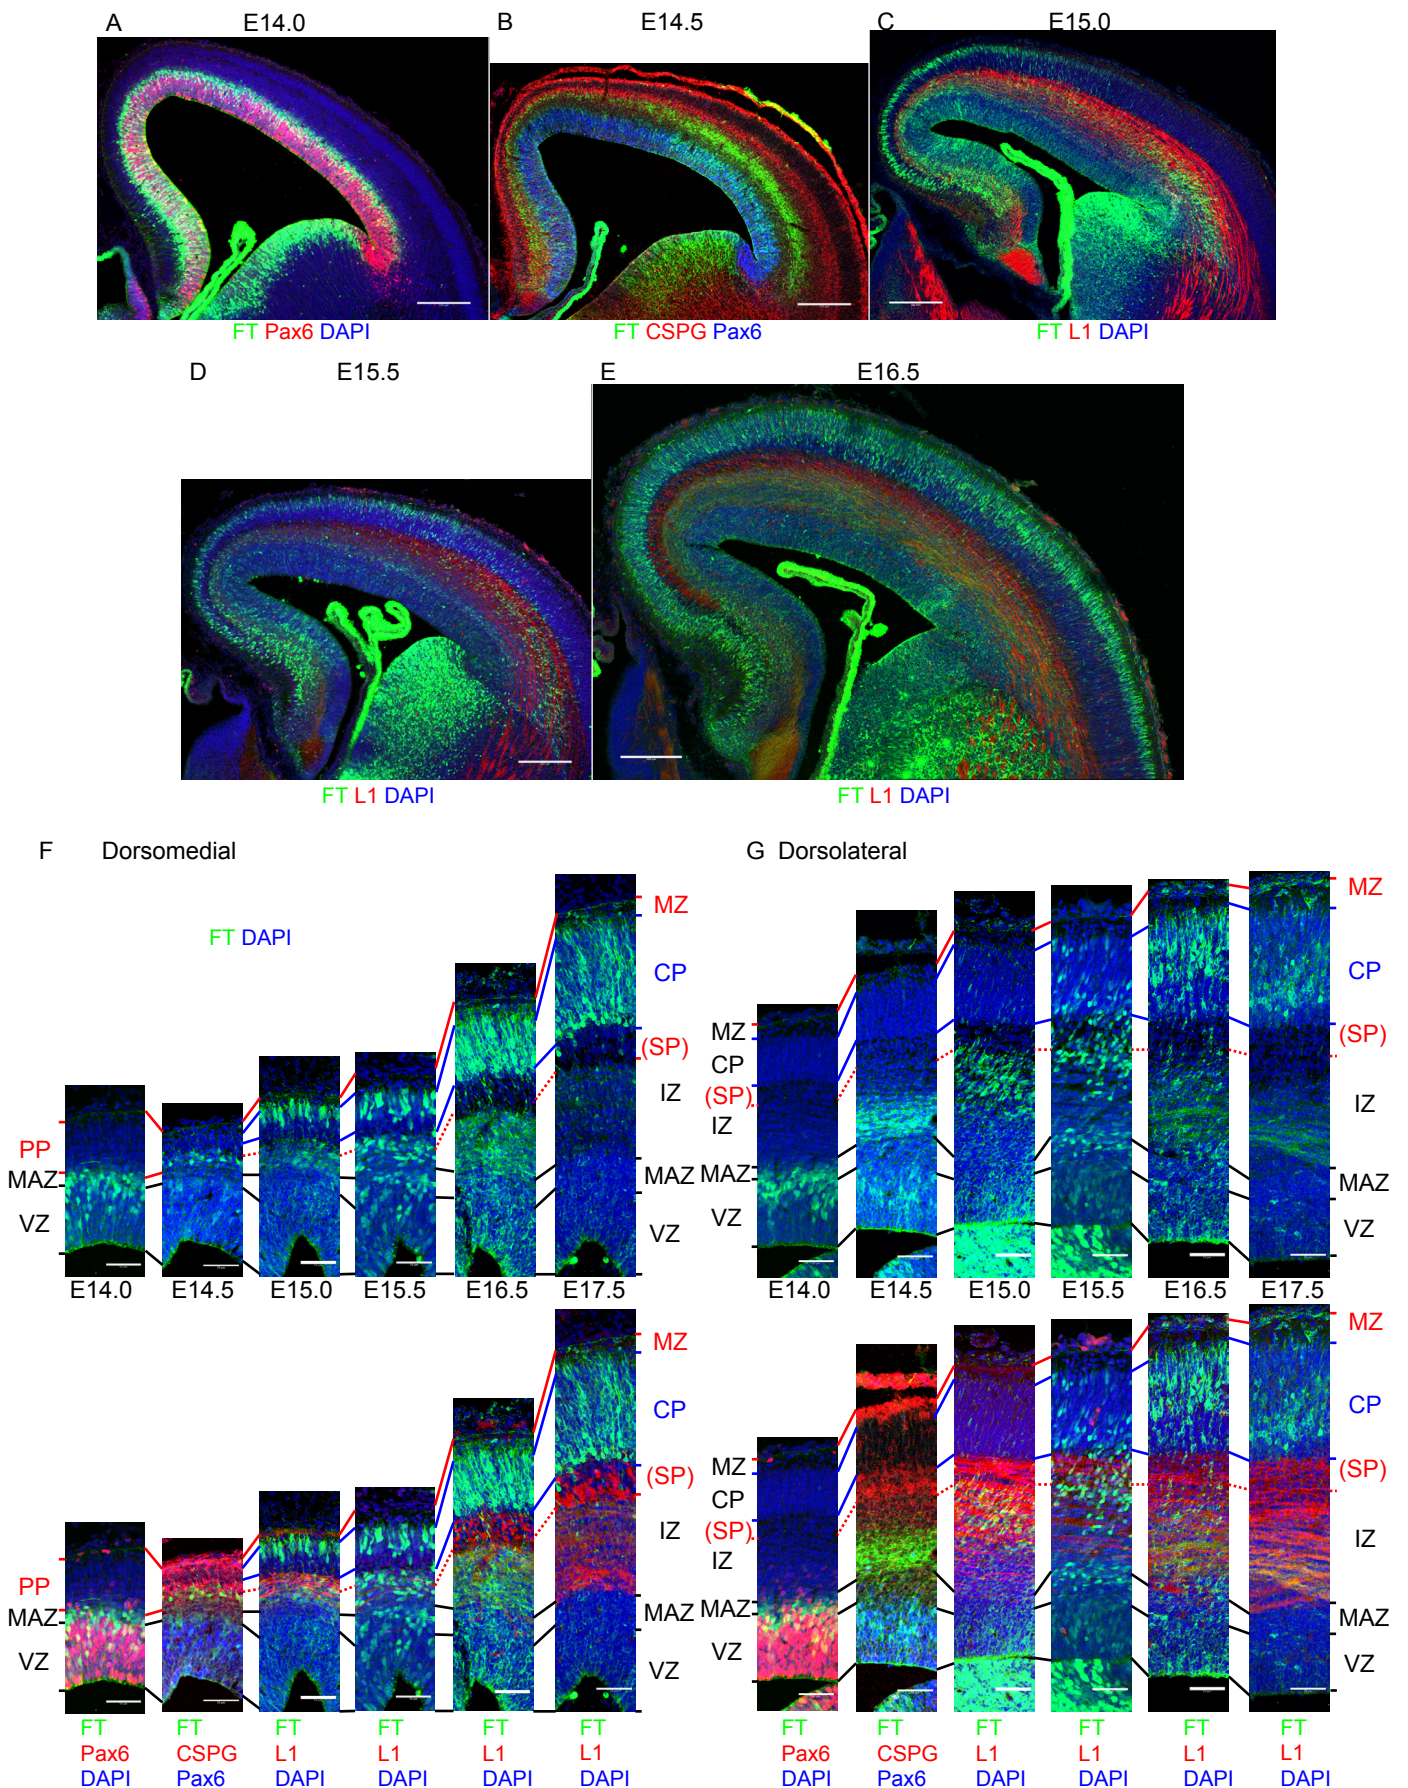

Figure 7

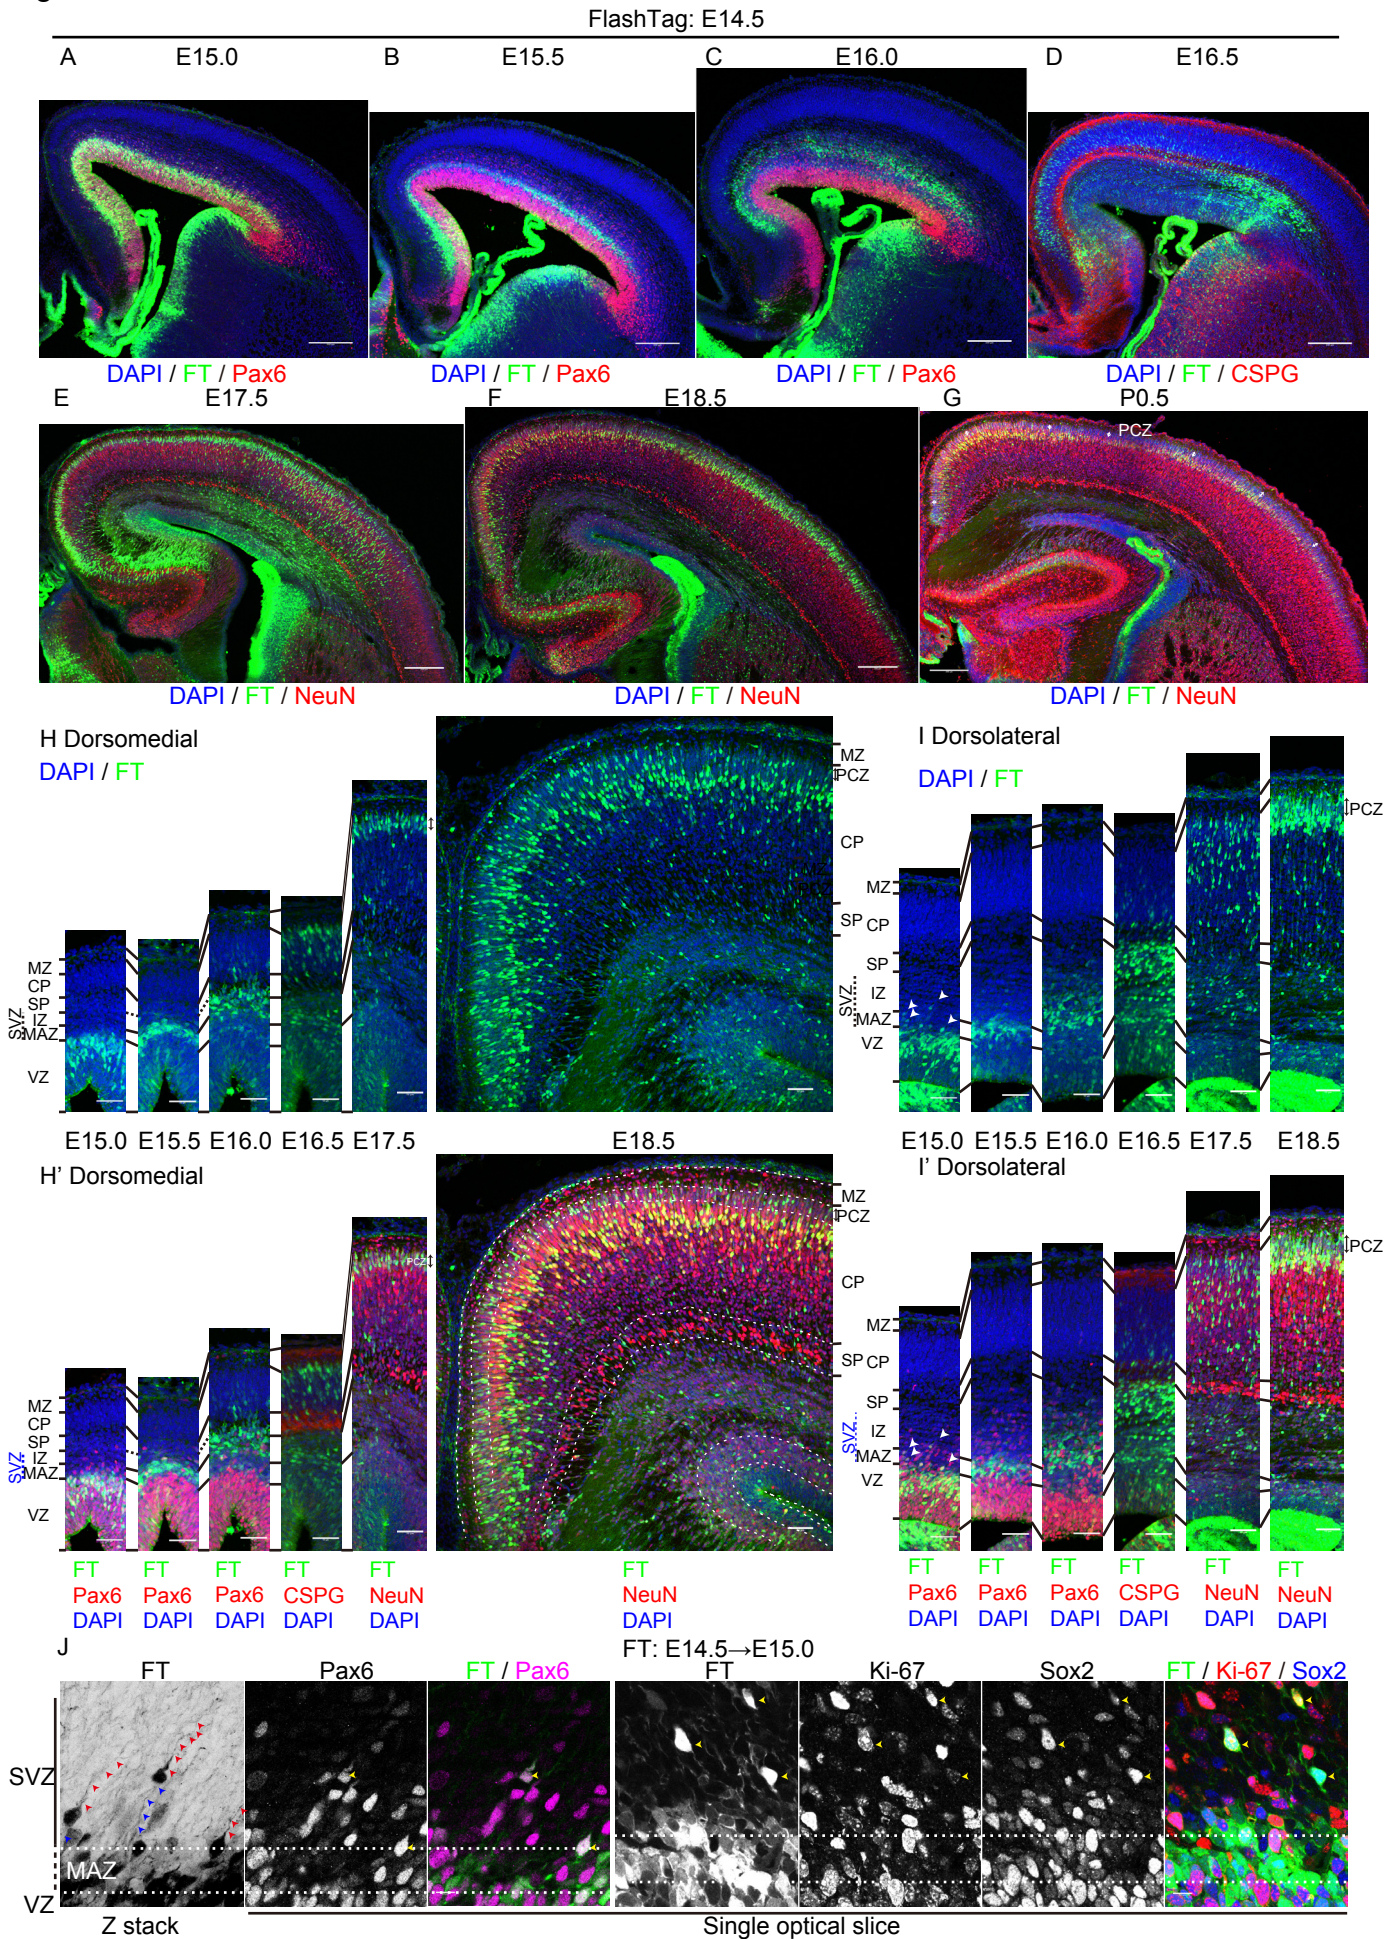



## Figure 8

A Dorsomedial

FlashTag: E15.5

DAPI / FT

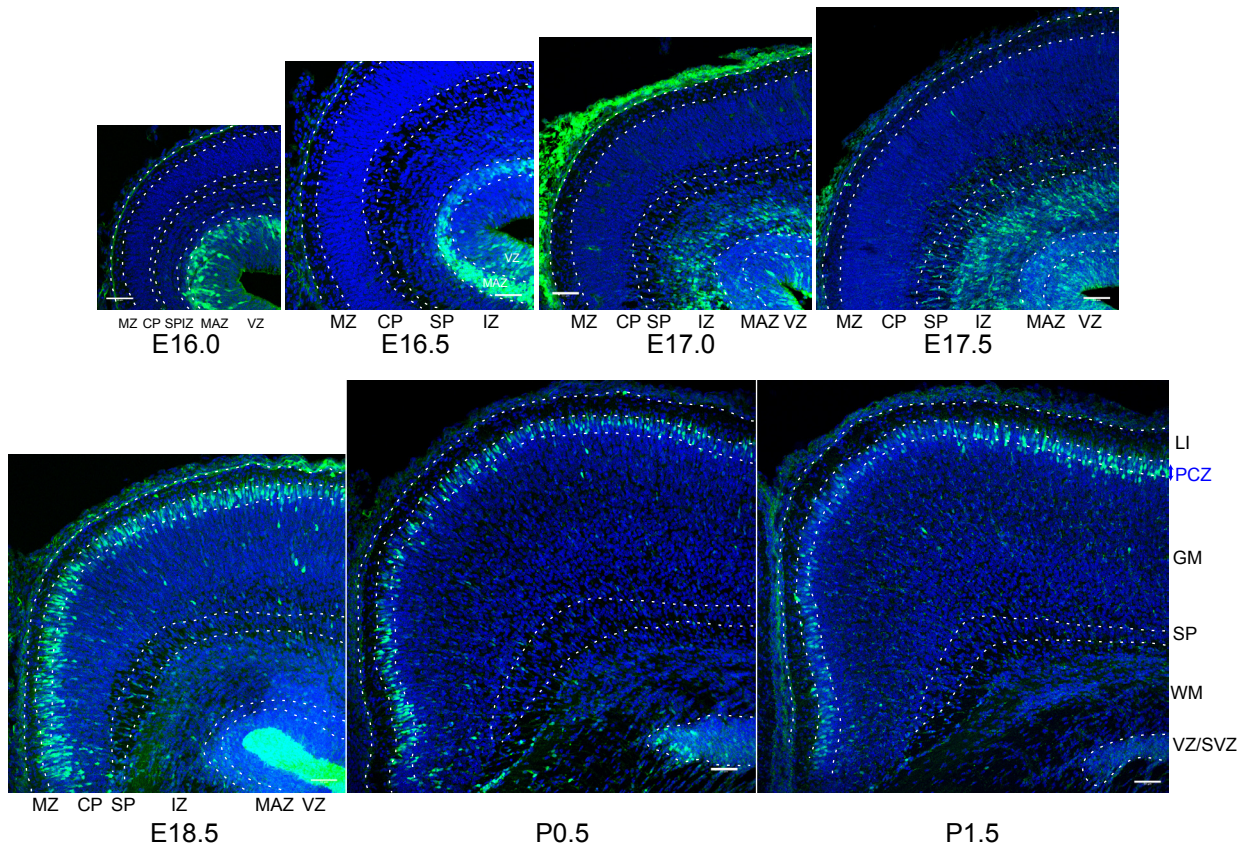

B Dorsolateral

FlashTag: E15.5

DAPI / FT

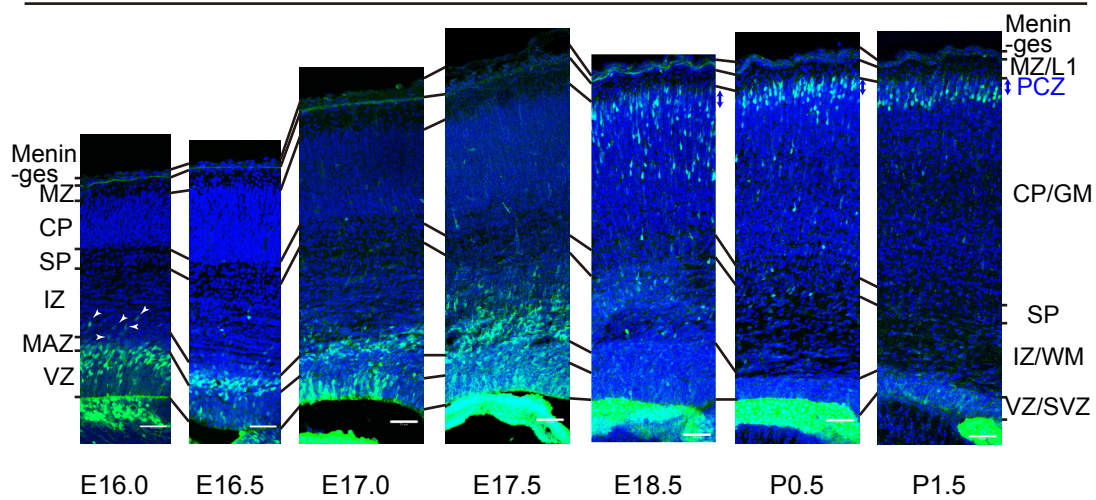

Figure 9

FlashTag: E17.0

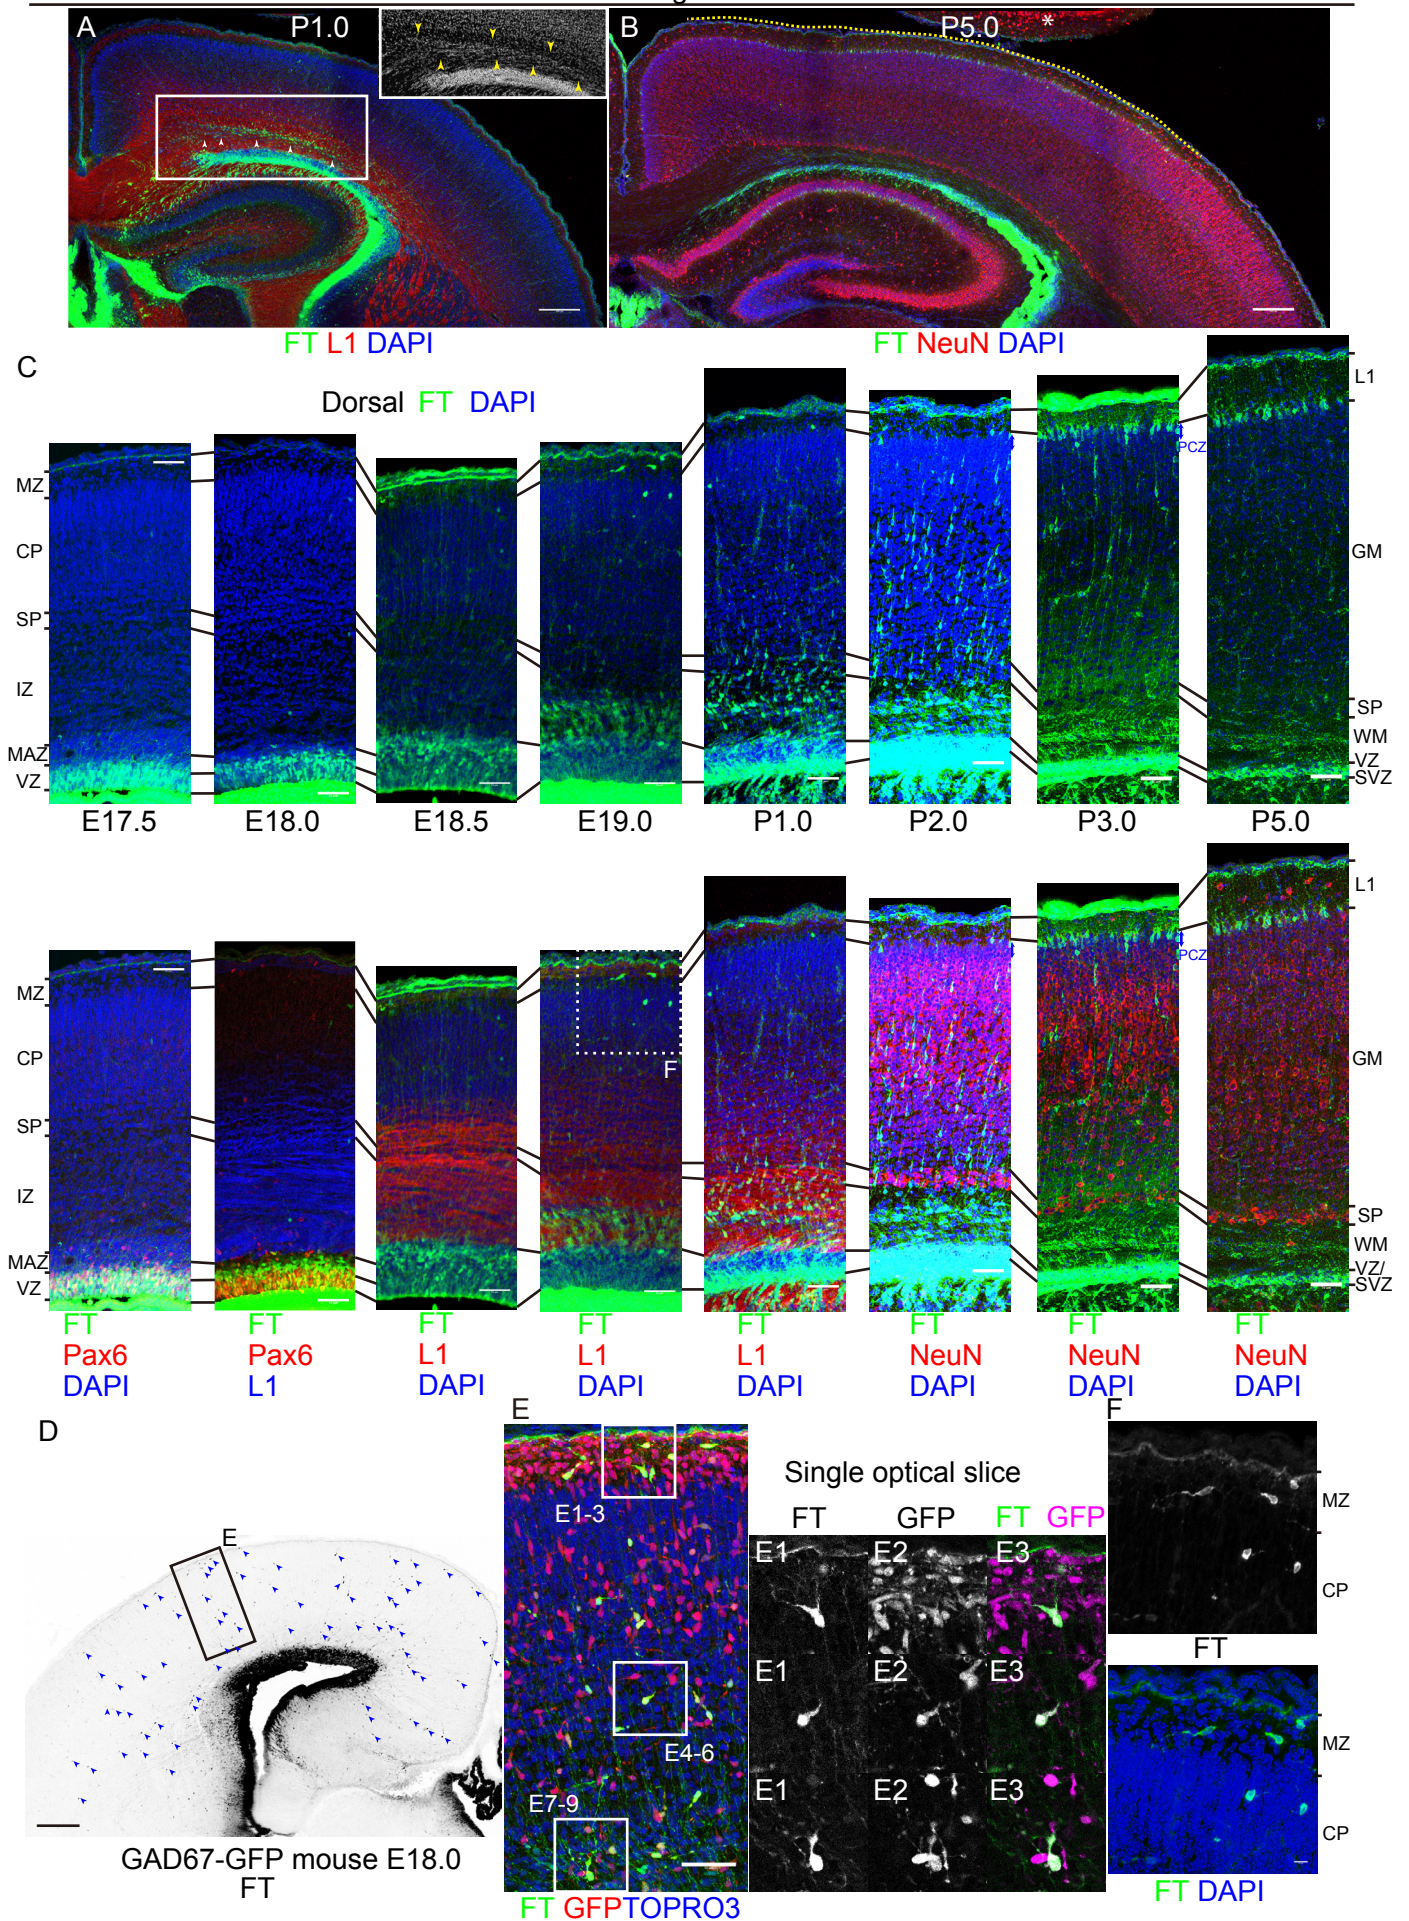

Figure 10

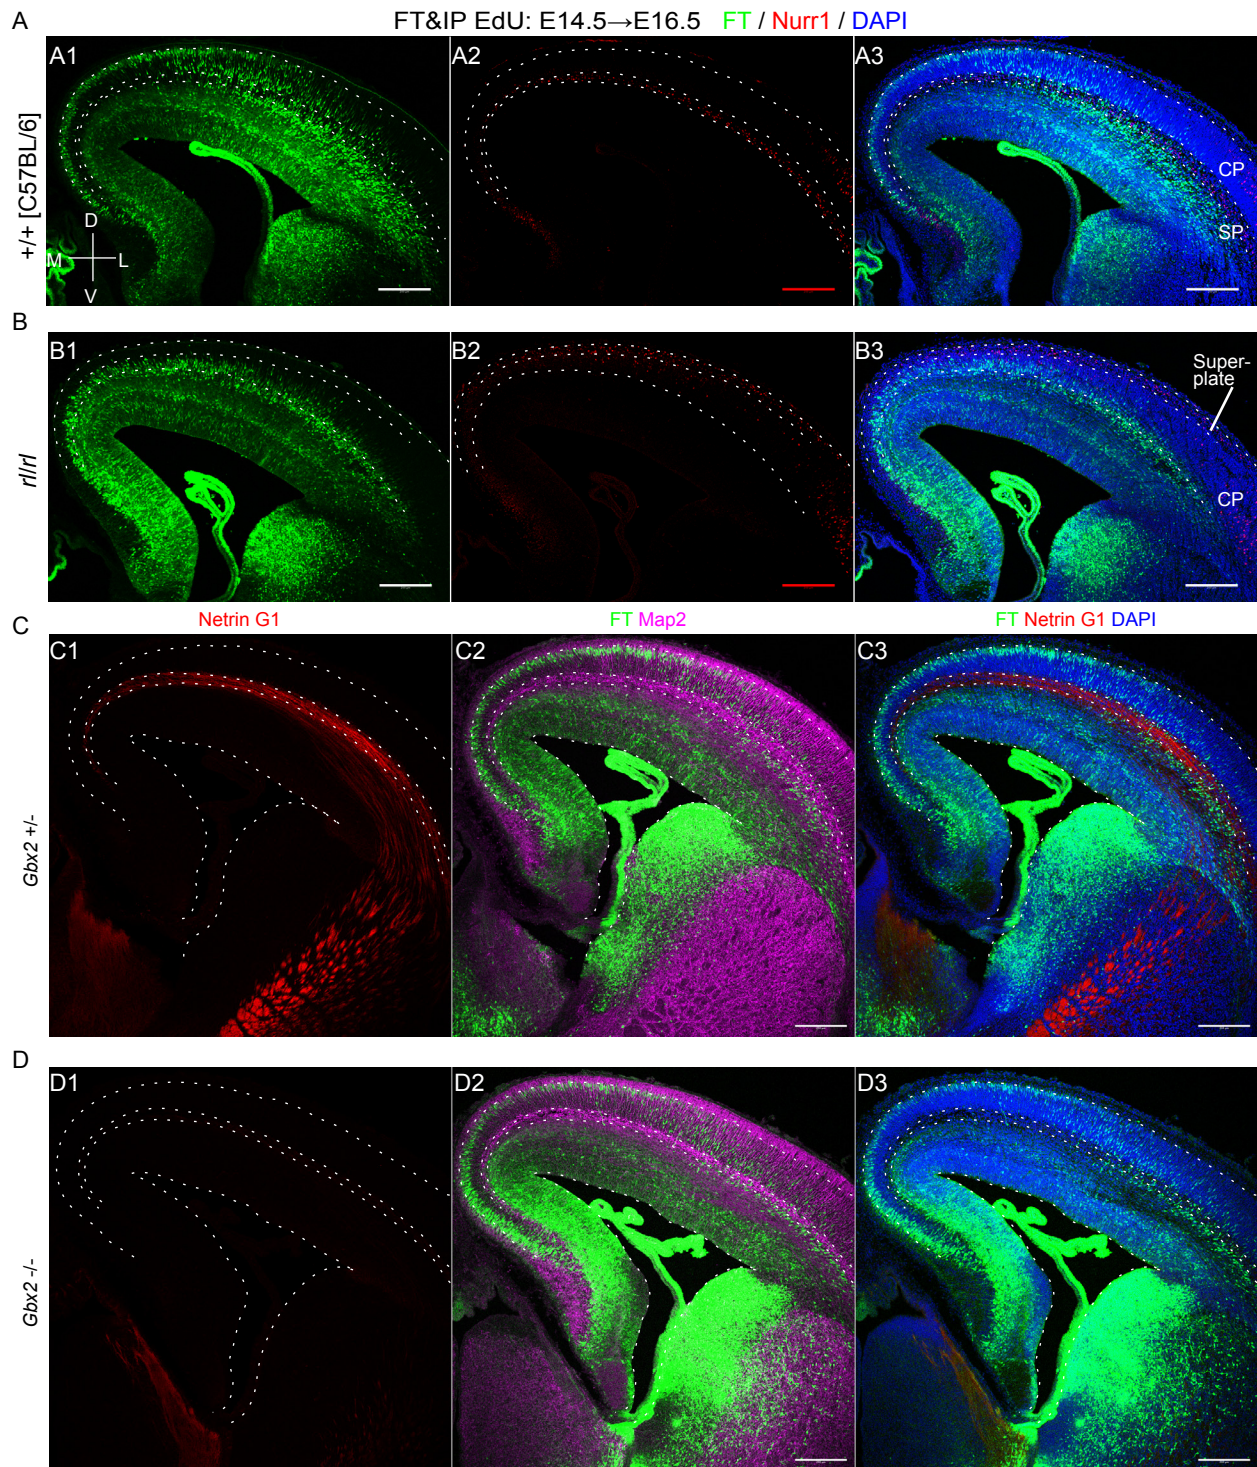

Source: https://www.biorxiv.org/content/10.1101/2020.10.05.317925v1.full.pdf
